# Supplementary material
Source: MDPI journal article supplement (https://www.mdpi.com/2075-163X/9/9/537)
Supplement: s1 [file s1]

## Supplementary Materials

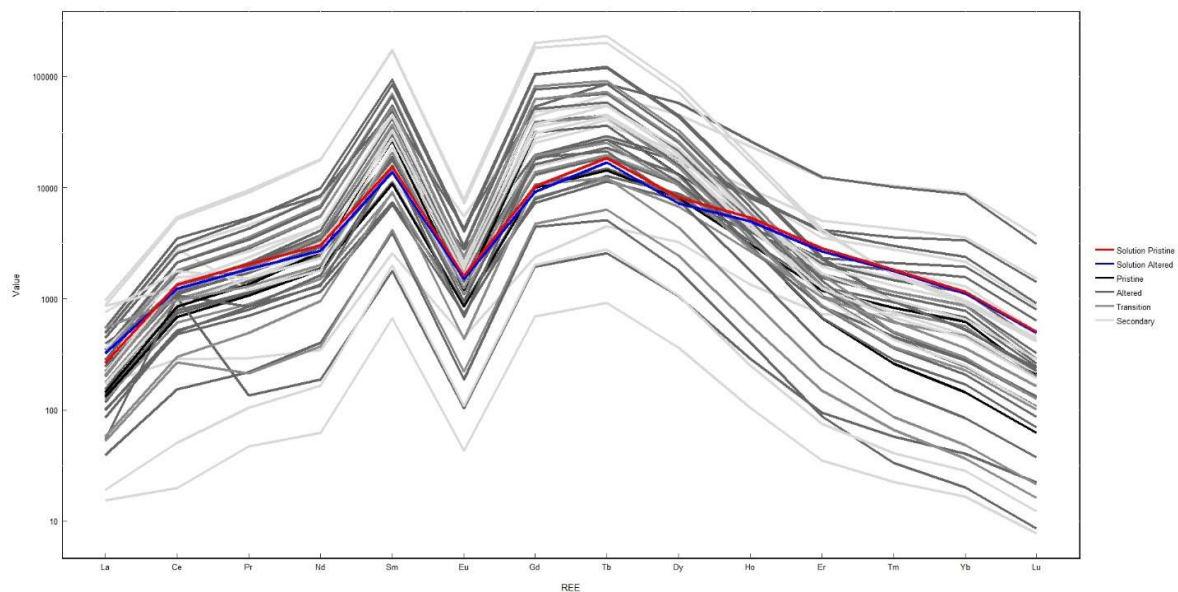

Sample #333, Yancey, Intrusive non-granite related.

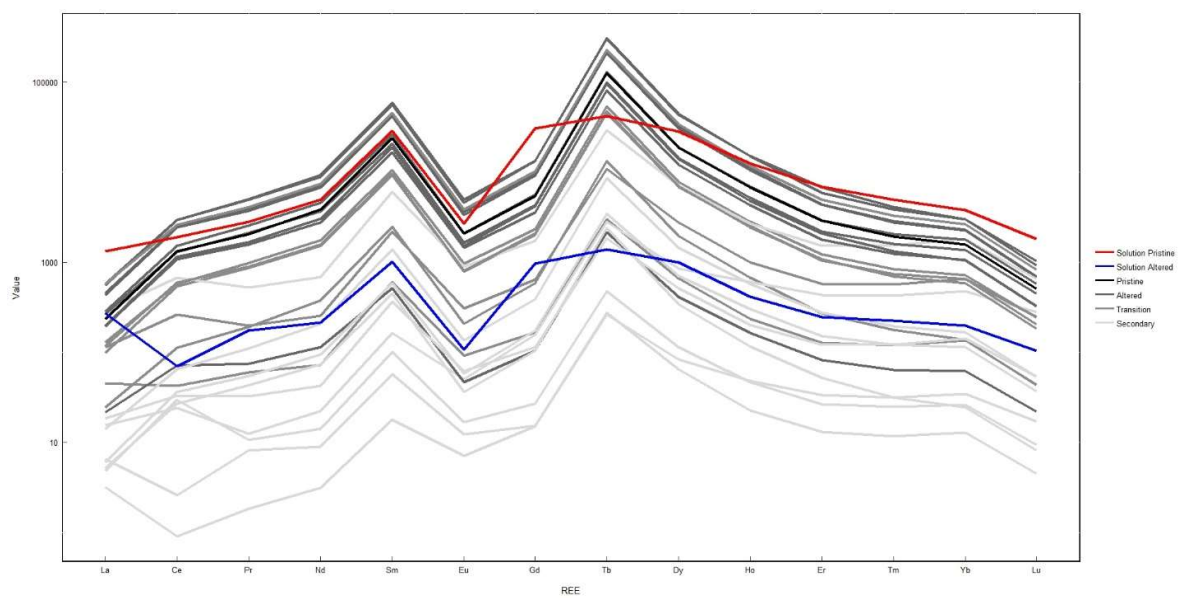

Sample #334, Mitchell 1, Intrusive non-granite related.

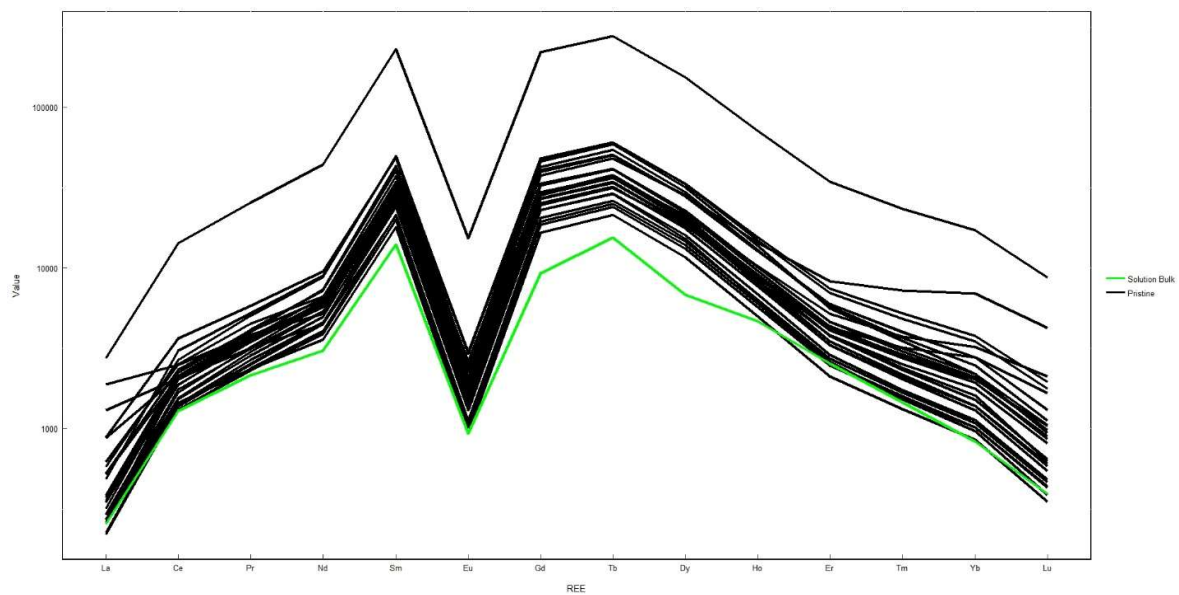

**Sample #338, Mitchell 2, Intrusive non-granite related.**

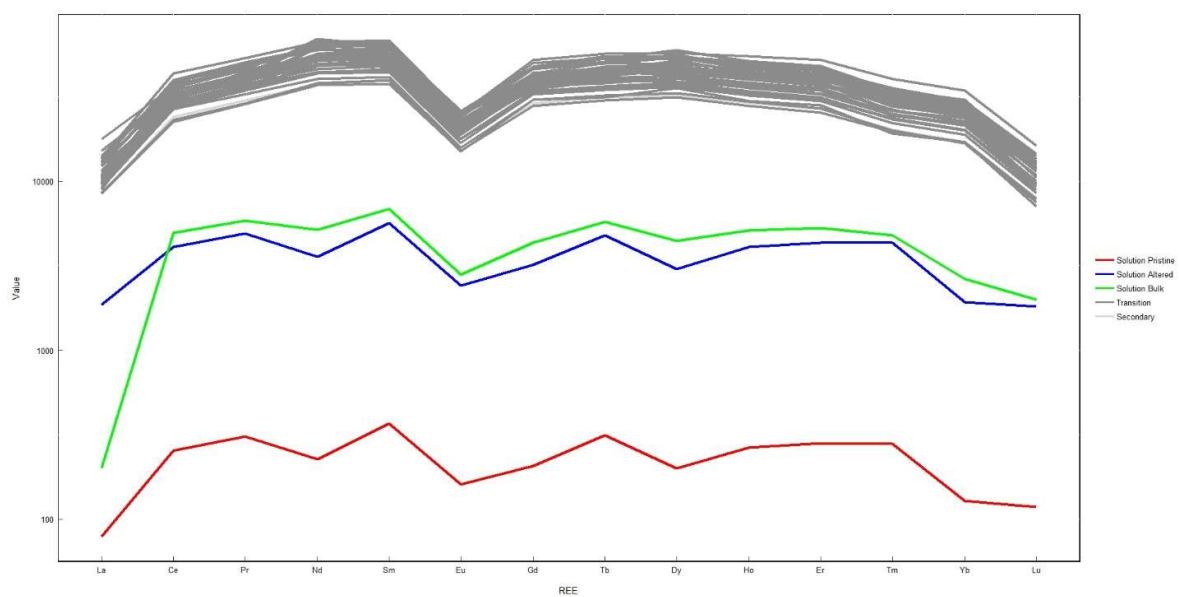

**Sample #340, Bancroft, Intrusive non-granite related.**

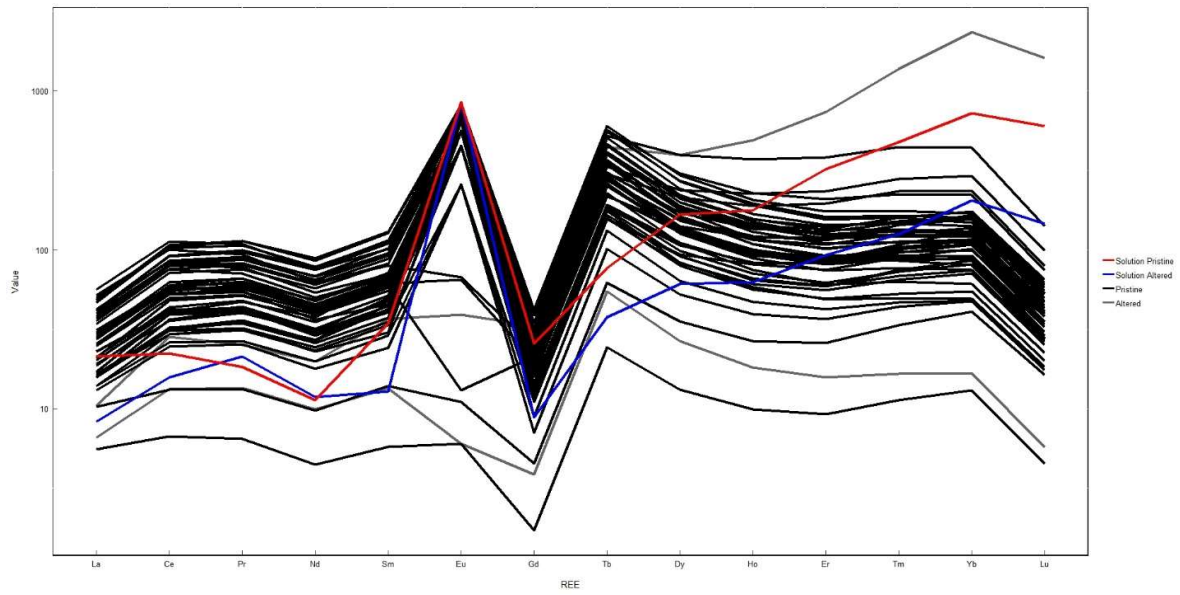

**Sample #344, Ruggles, Intrusive non-granite related.**

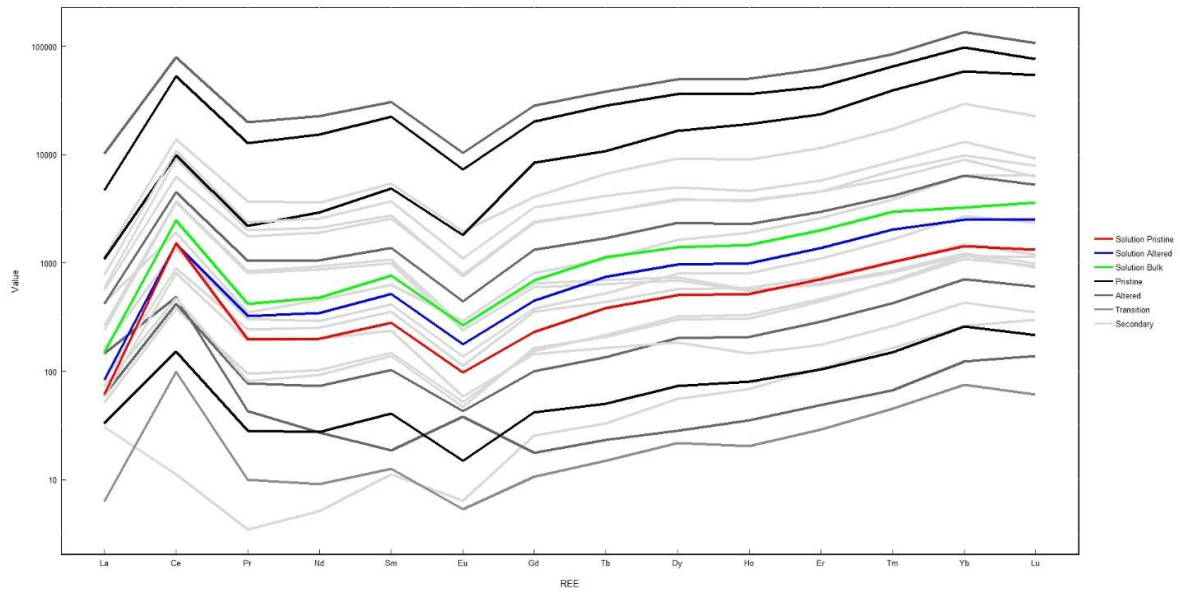

**Sample #348, Foster Lake, Intrusive non-granite related.**

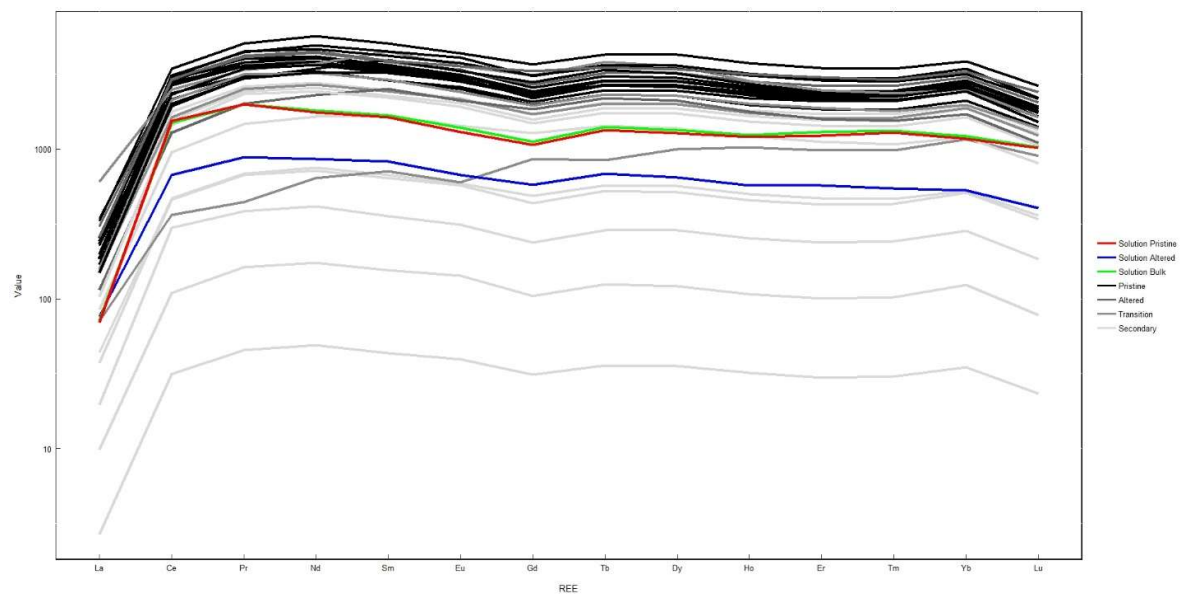

**Sample #353, Happy Jack, Sandstone tabular.**

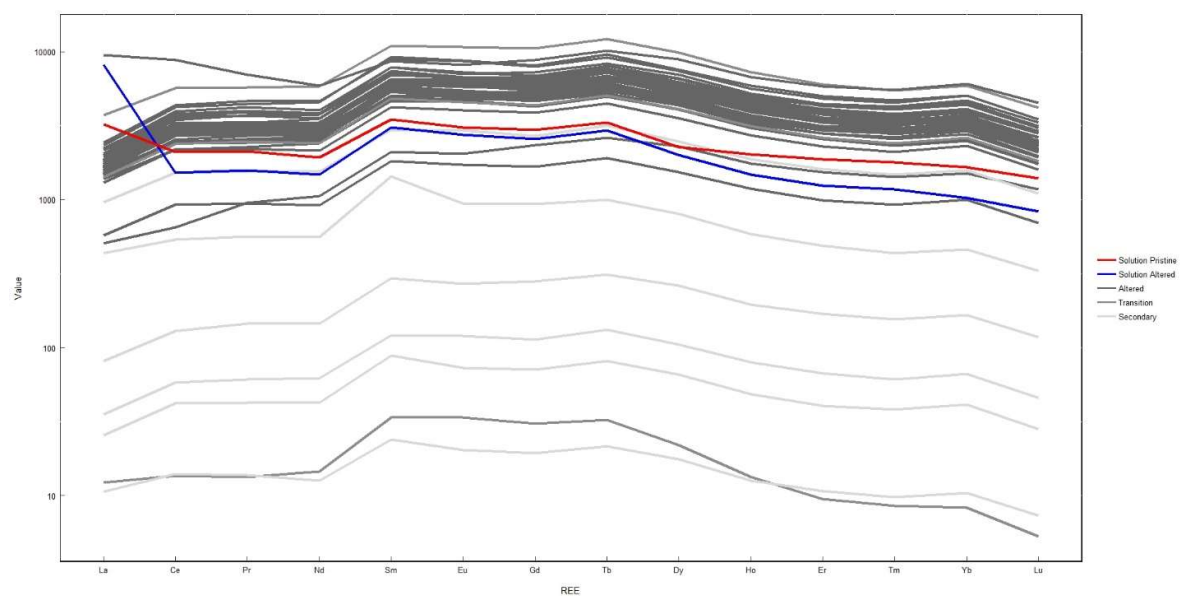

**Sample #423, Great Bear 1, Metamorphite.**

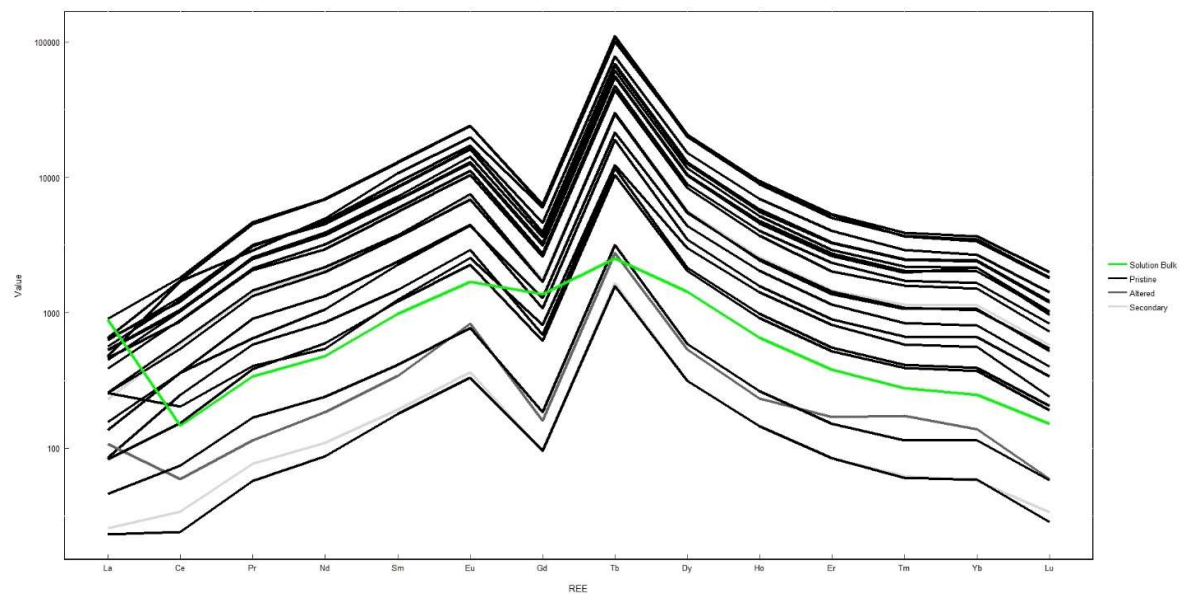

**Sample #437, Shinkolobwe1, Metamorphite.**

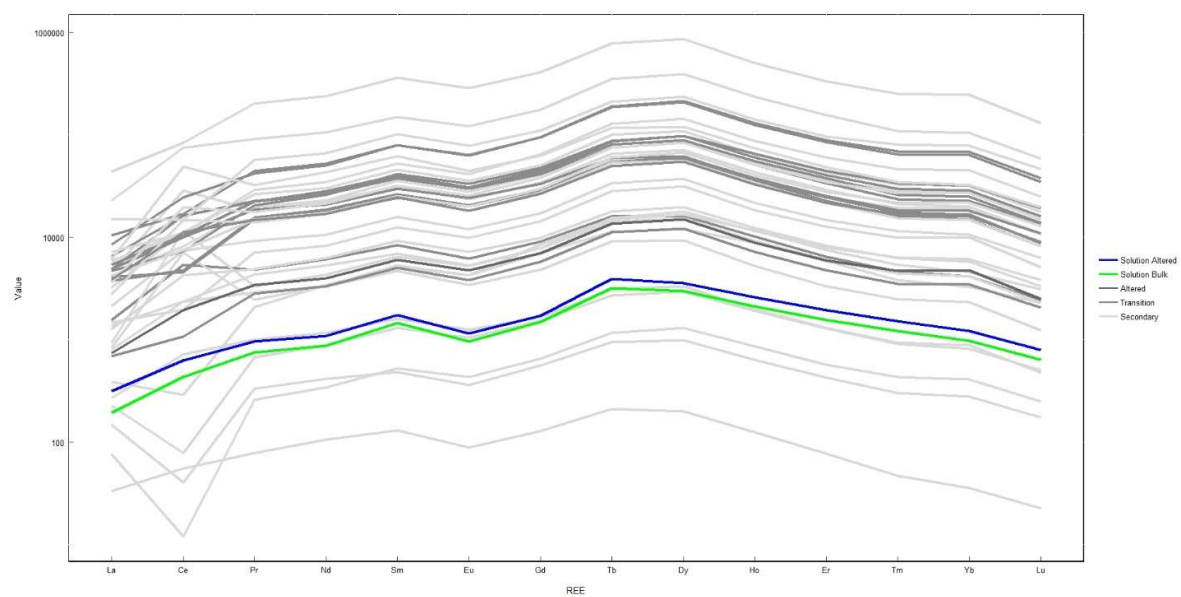

**Sample #511, Rabbit Lake, Proterozoic unconformity.**



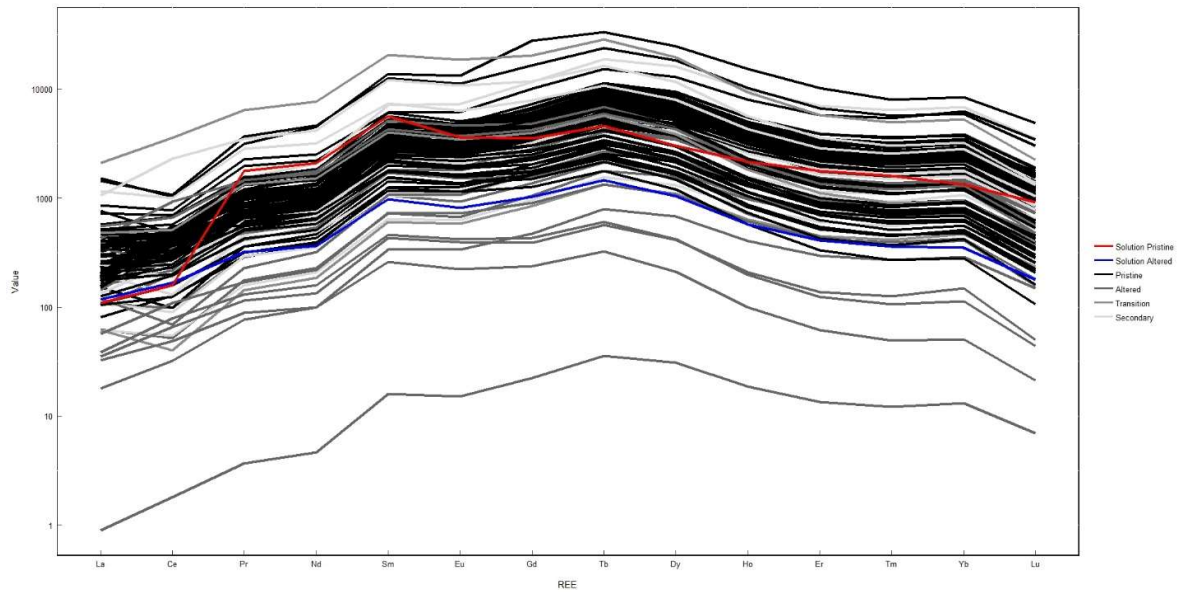

**Sample #516, Australia 1, Metamorphite.**

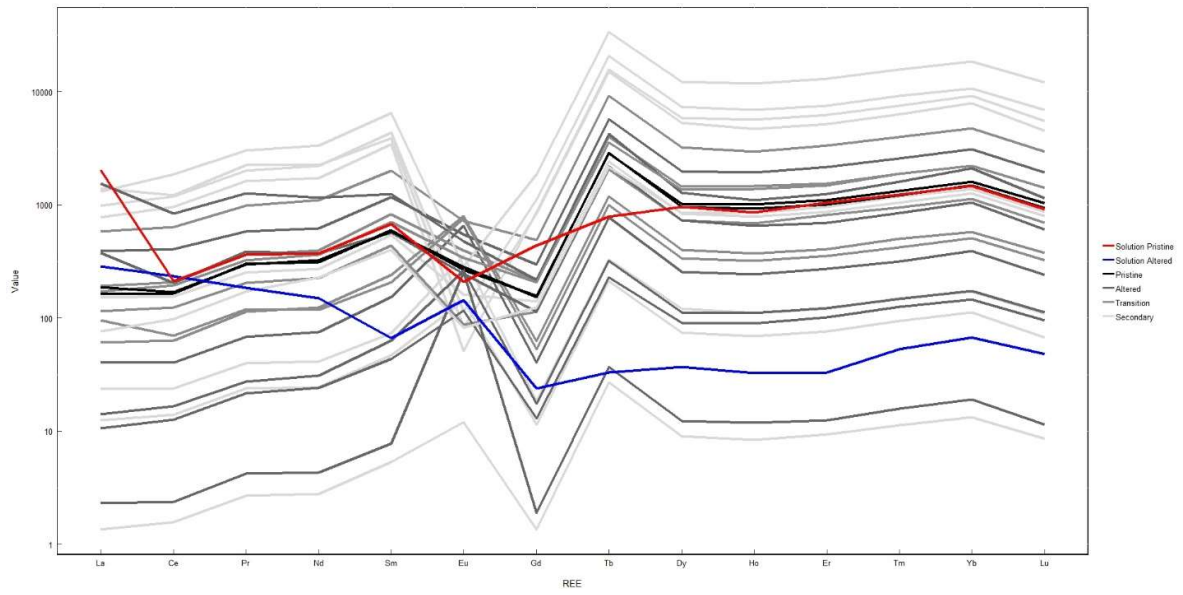

**Sample #522, Billiken, Metamorphite.**

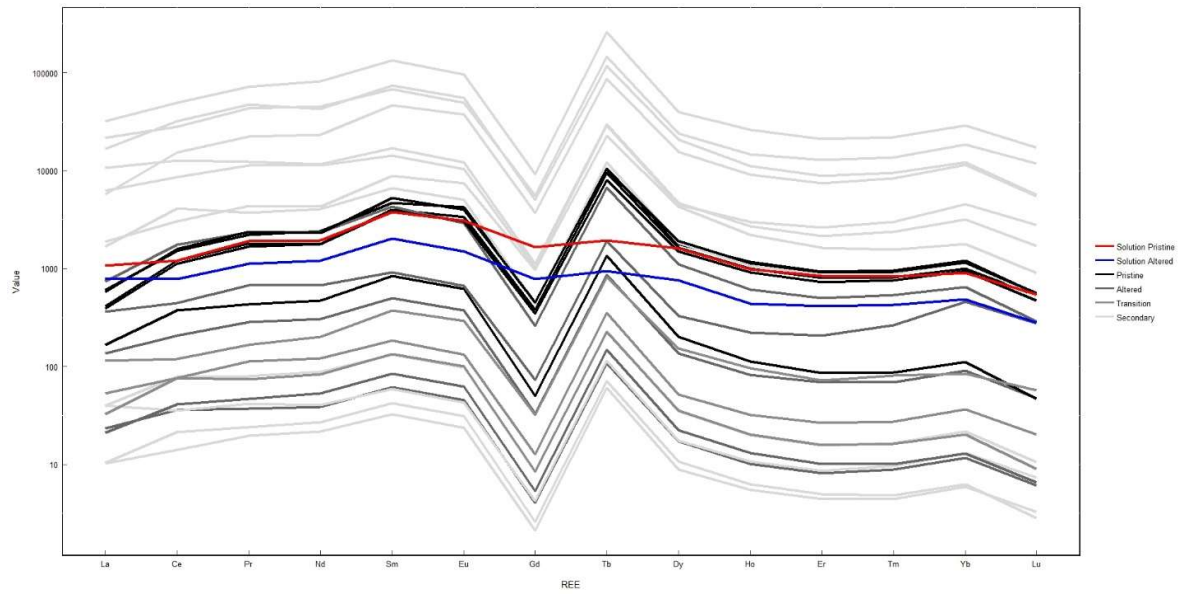

**Sample #531, Marshall 1, Metamorphite hydrothermal vein.**

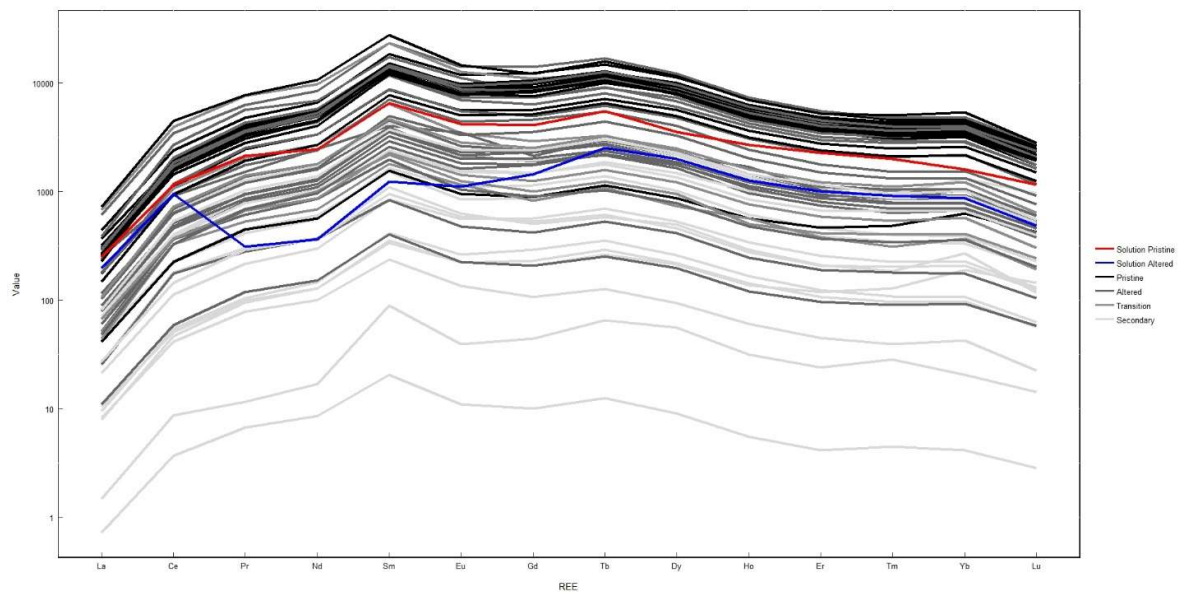

**Sample #564, Jachymov, Intrusive granite related.**

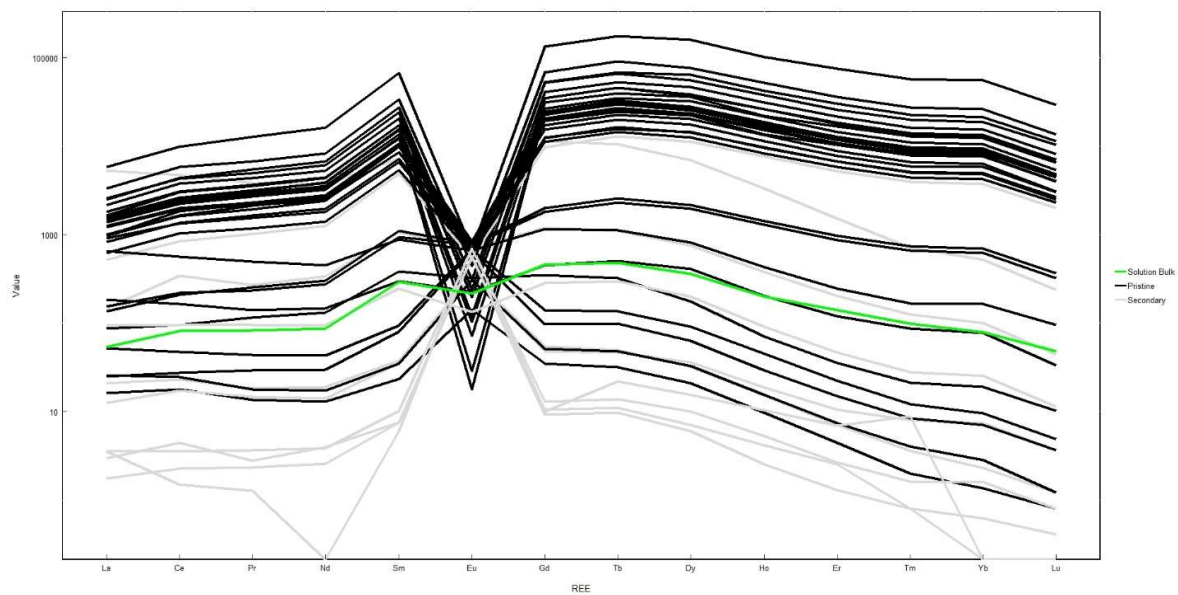

**Sample #604, Australia 2, Proterozoic unconformity.**

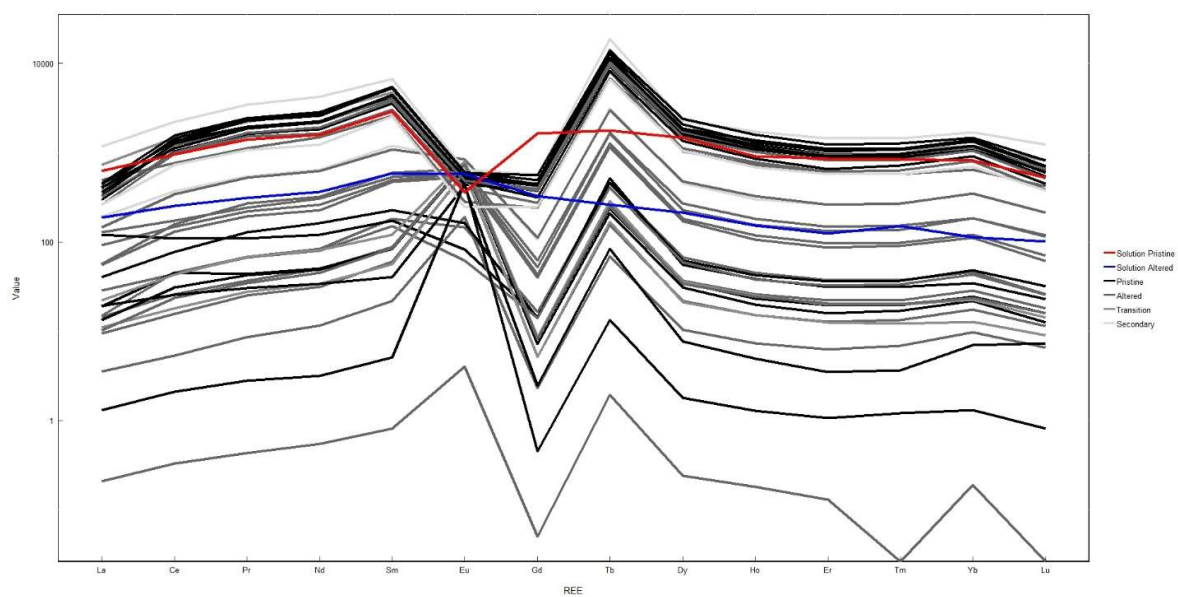

**Sample #623, Marshall 2, Metamorphite hydrothermal vein.**



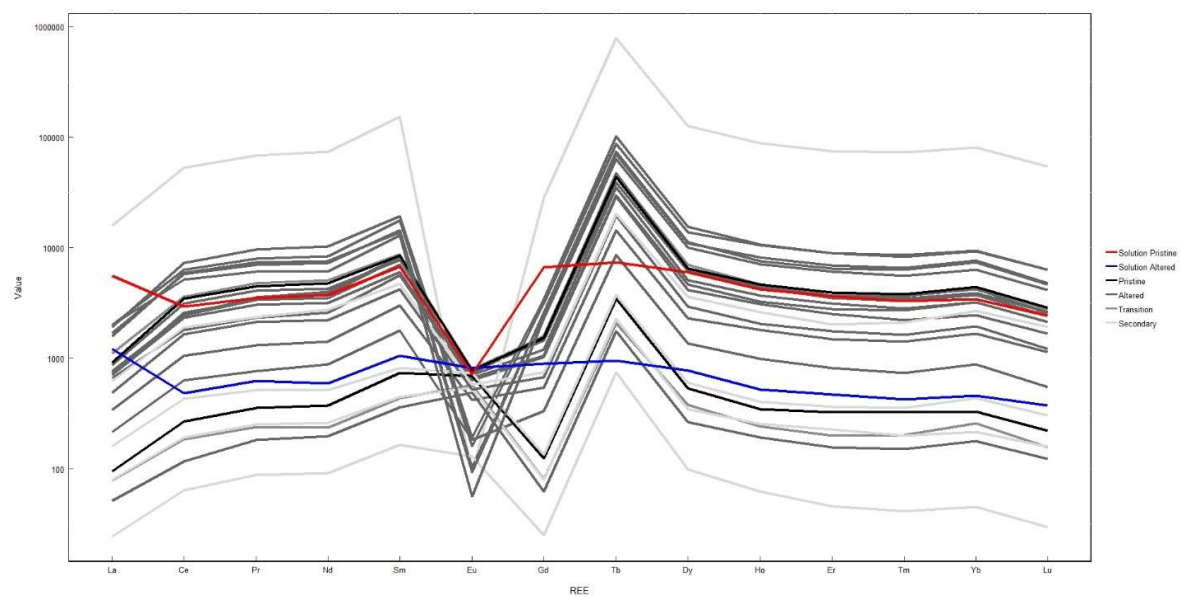

Sample #626, Great Bear 2, Metamorphite.

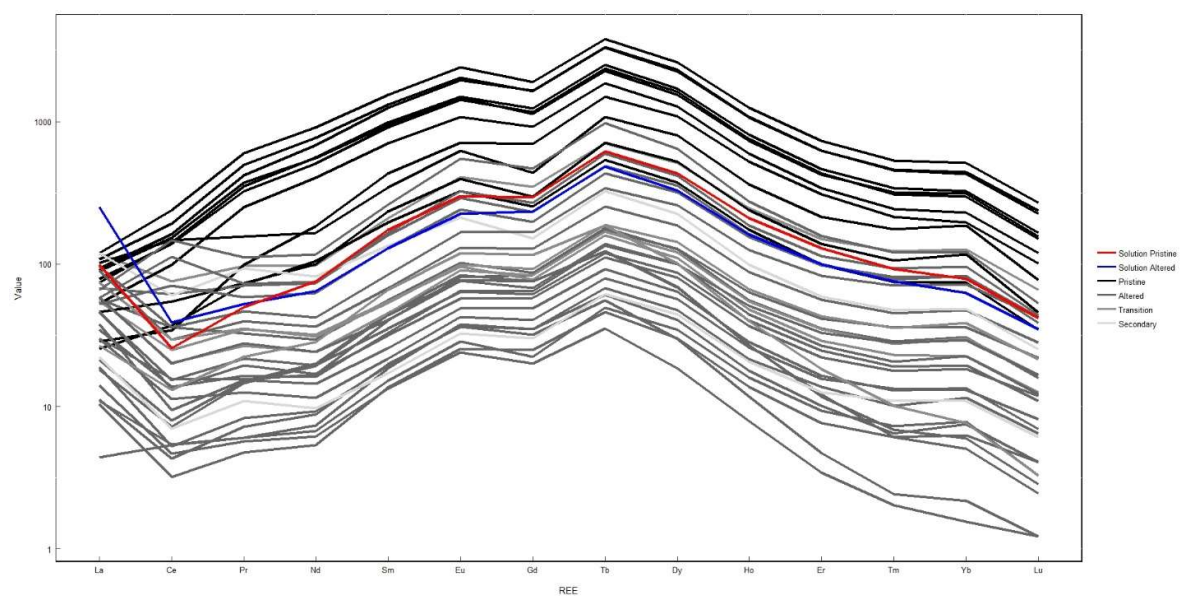

Sample #662, Shinkolobwe 2, Metamorphite.

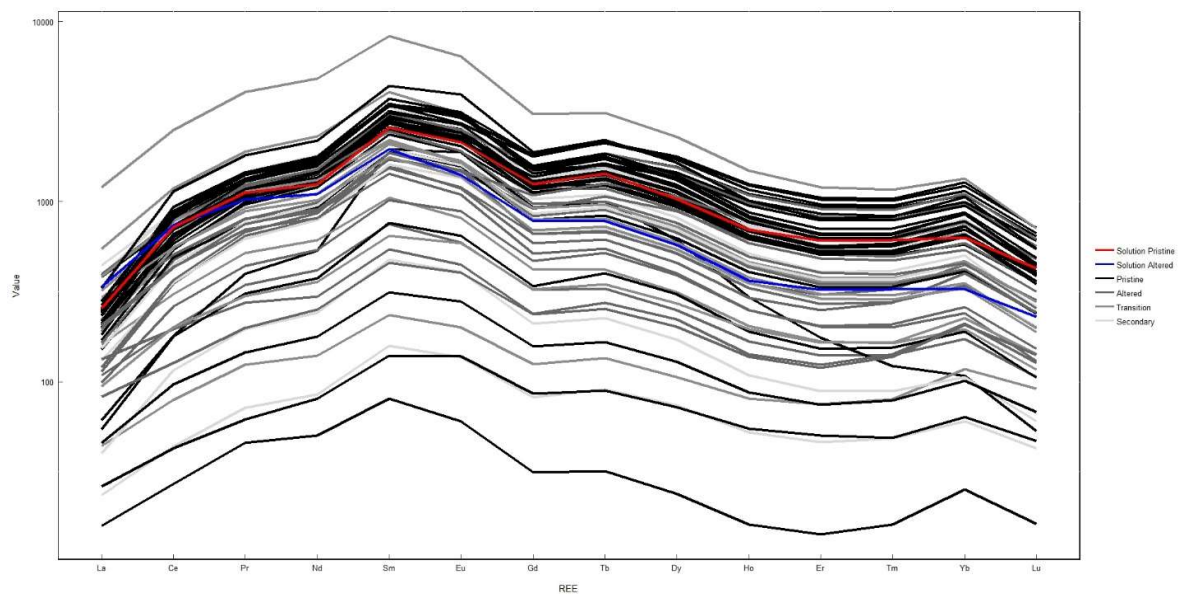

**Sample #809, Marshall 3, Metamorphite hydrothermal vein.**

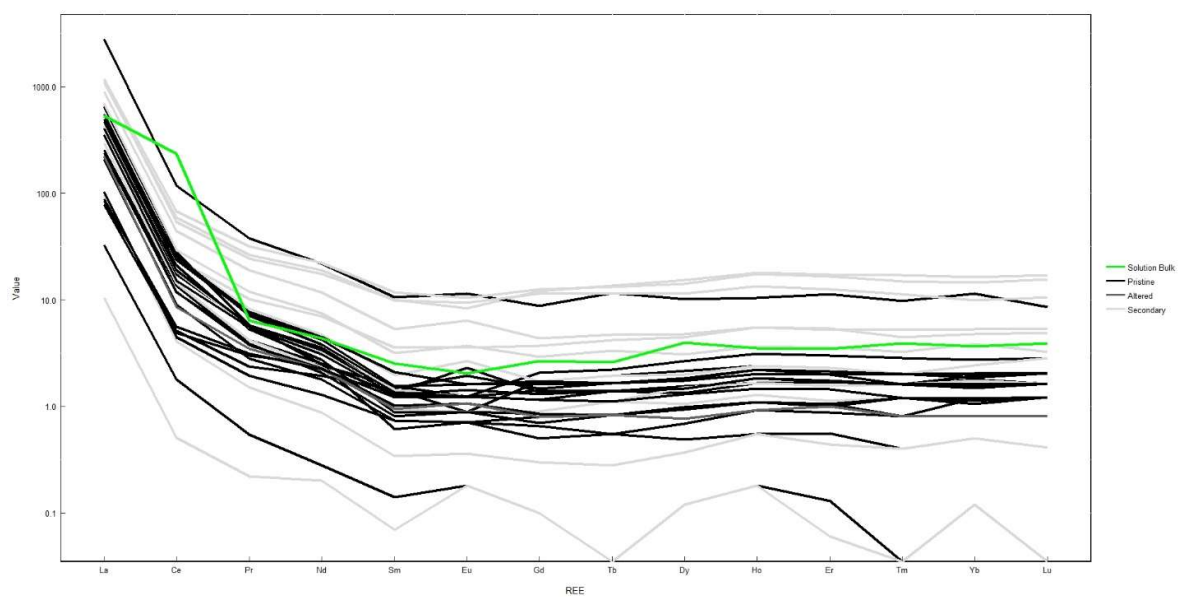

**Sample #1232, Big Indian Wash 1, Sandstone.**

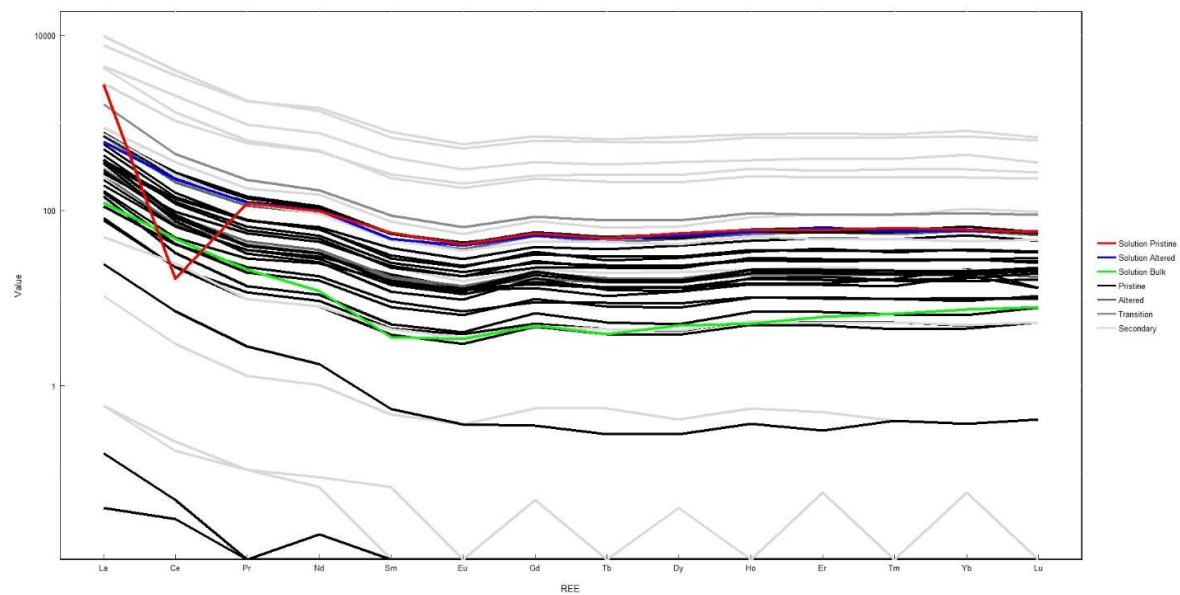

Sample #1237, Adair Mine 1, Sandstone.

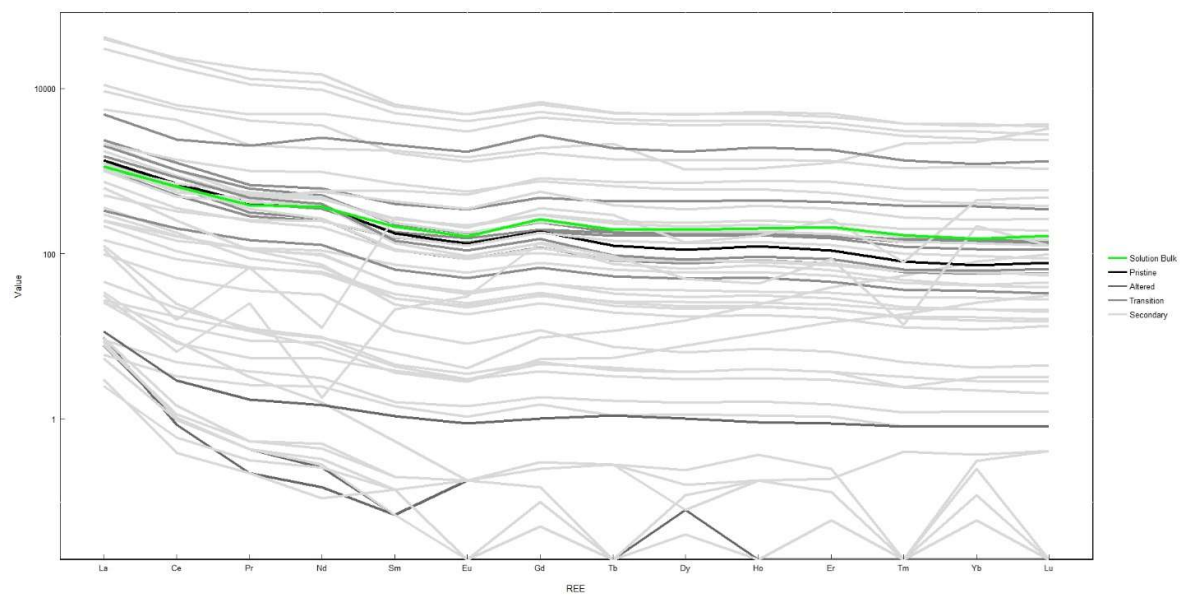

Sample 1262, Adair Mine 2, Sandstone.

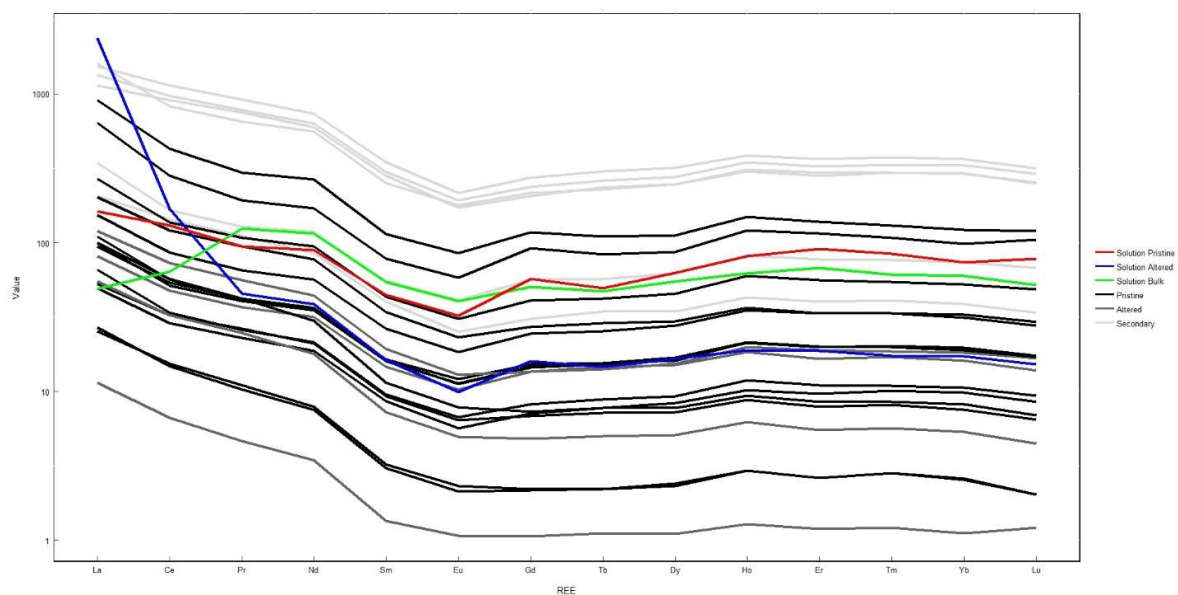

**Sample #1303, Big Indian Wash 2, Sandstone.**

**Figure S1.** Chondrite normalized rare earth element composition of all samples ( $n = 23$ ) examined in this study. The solution analyses are compared to the in-situ analysis with the pristine solution given in red, altered in blue and bulk in green. The in-situ colored based on their measured  $\text{UO}_2$  abundance; Pristine is black with a  $\text{UO}_2 > 80$  wt. %, altered is dark gray with a  $\text{UO}_2$  of 70–80 wt. %, transition gray ( $\text{UO}_2$  65–70 wt. %) and secondary being light gray ( $\text{UO}_2 < 65$  wt. %).



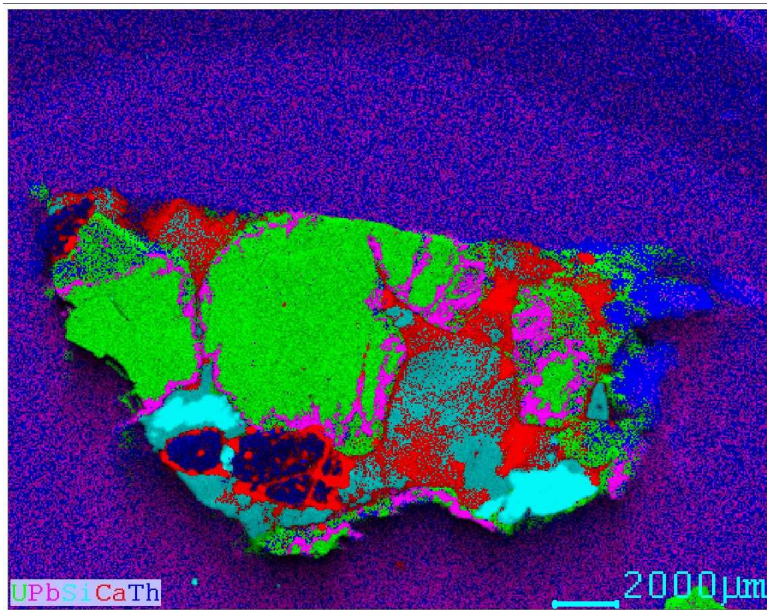

Yancey #333.

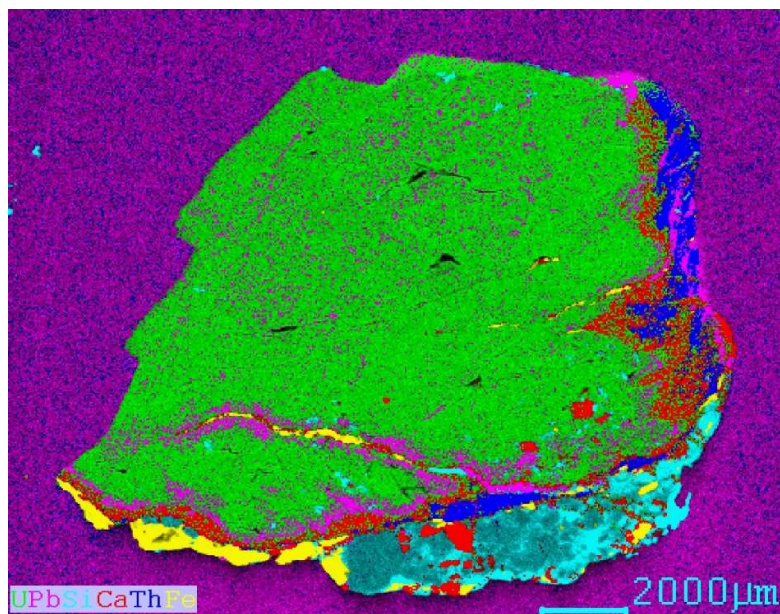

Mitchell 1 #334.



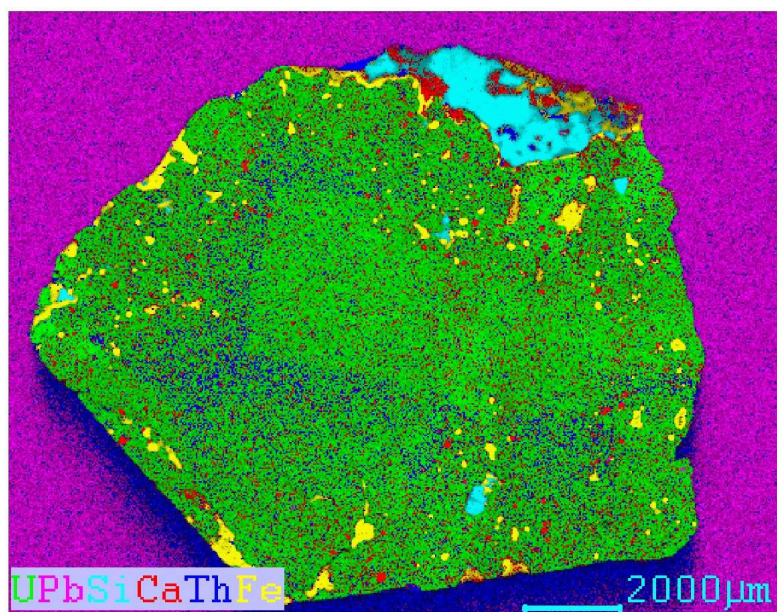

Mitchell 2 #338.

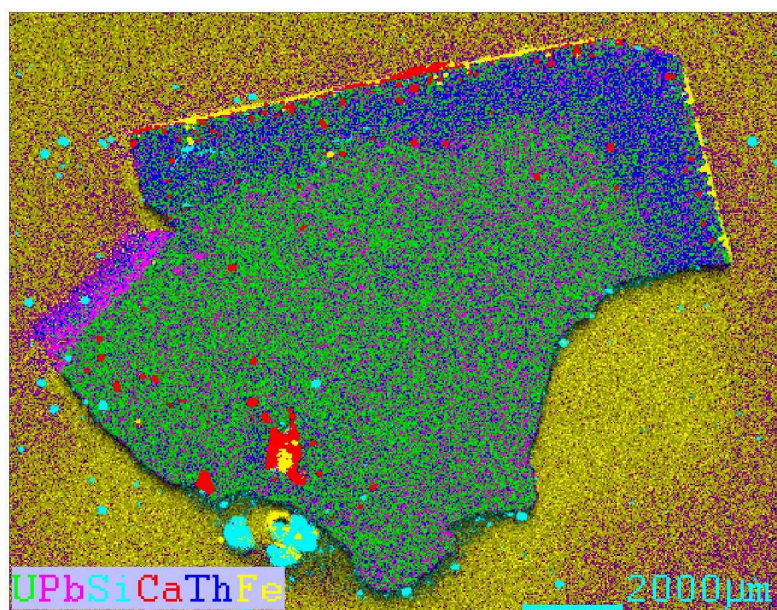

Bancroft #340.



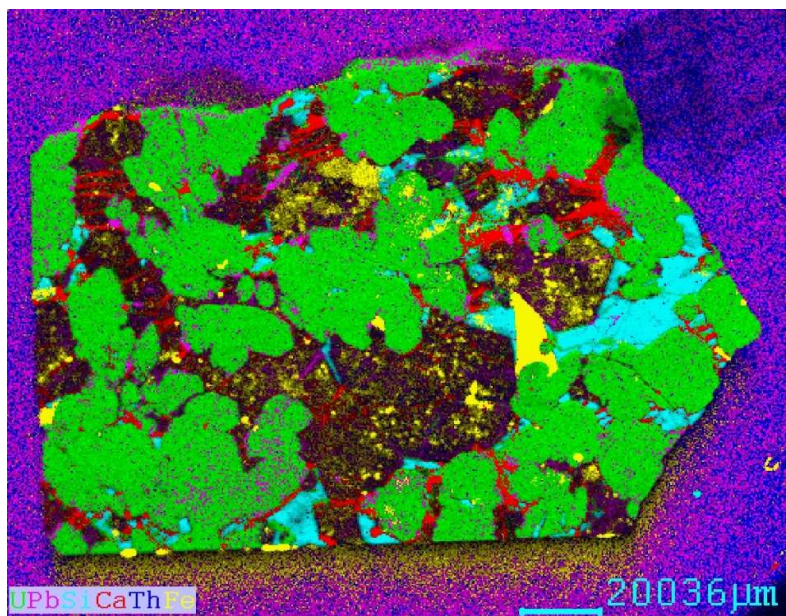

Ruggles #344.

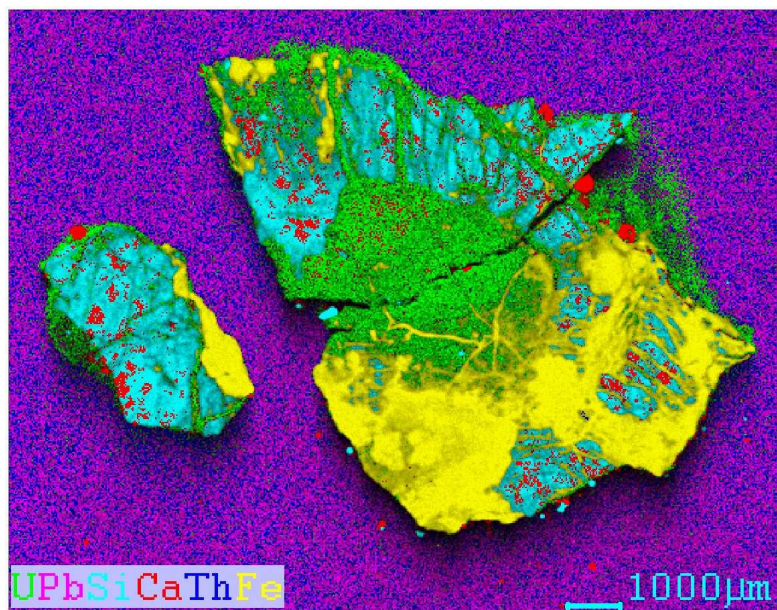

Foster Lake #348.



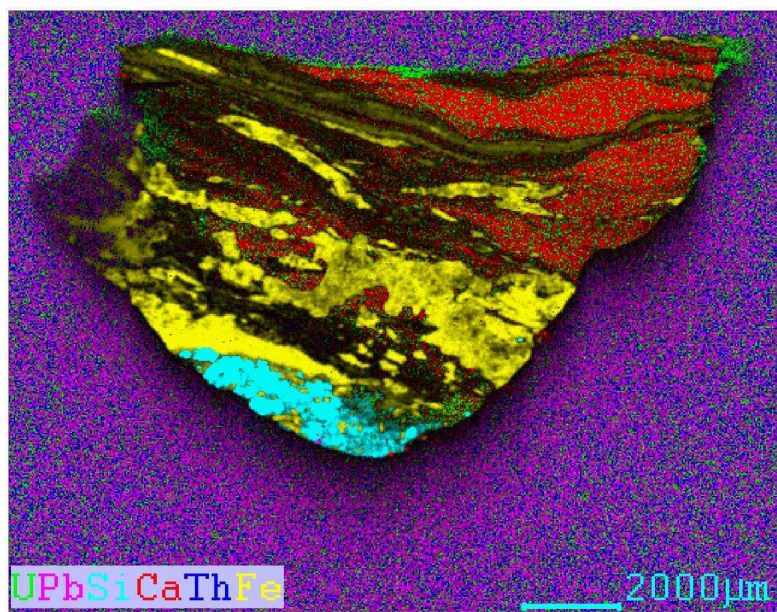

Happy Jack #353.

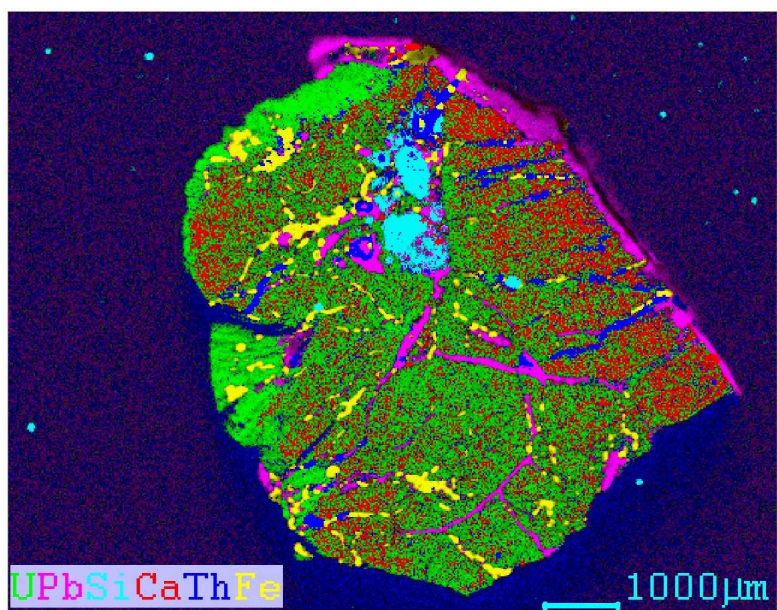

Great Bear 1 #423.

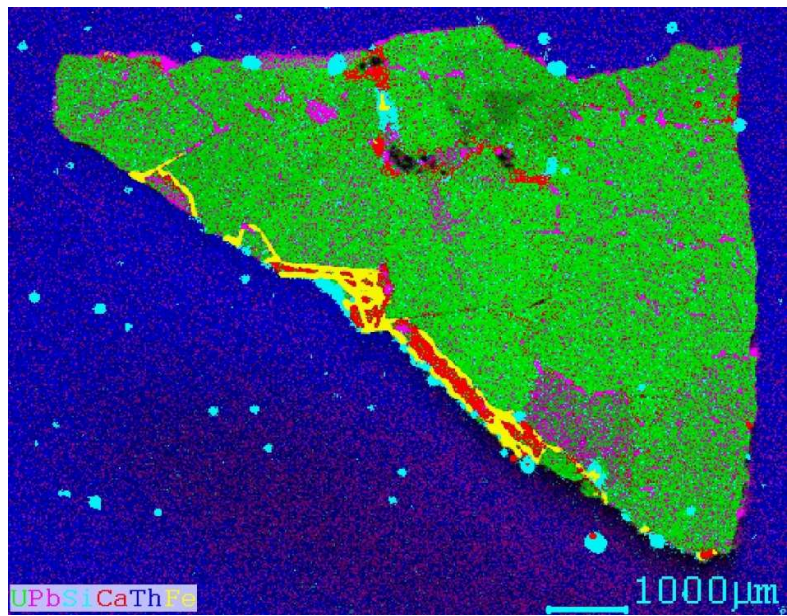

Shinkolobwe 1 #437.

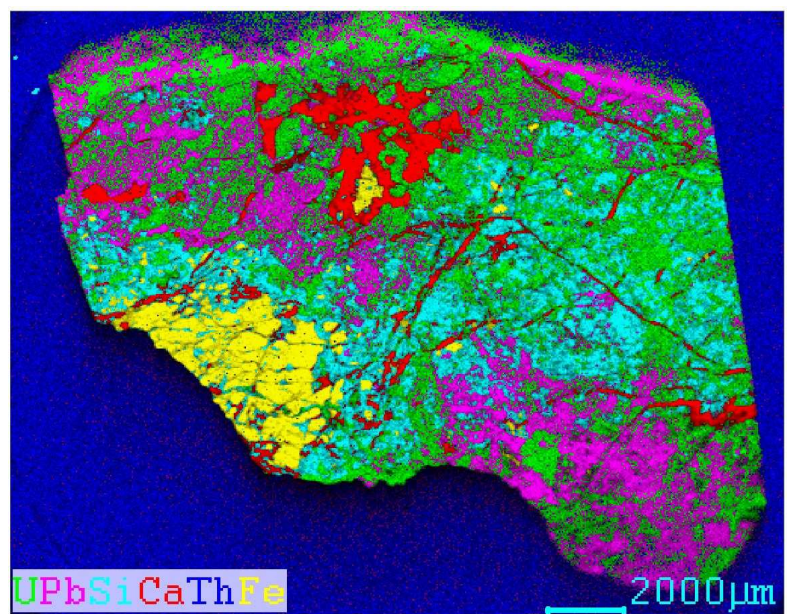

Rabbit Lake #511.



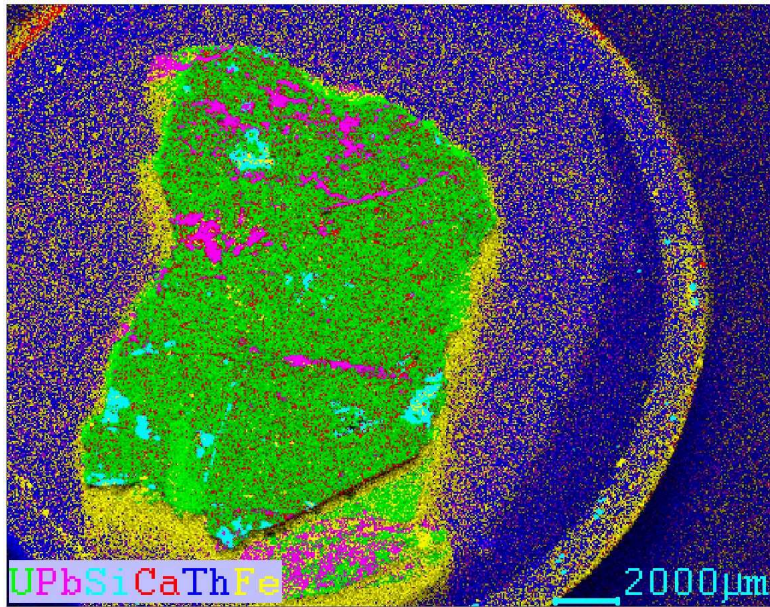

Australia 1 #516-T.

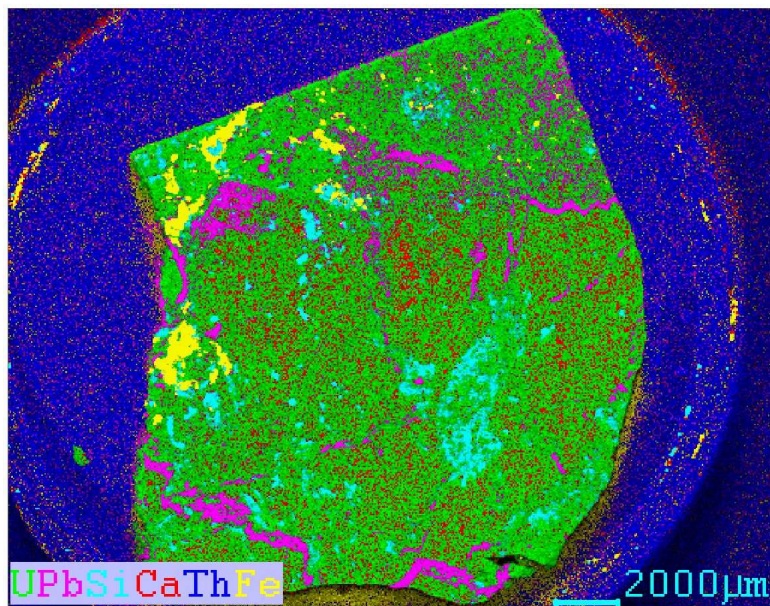

Australia 1 #516-B.



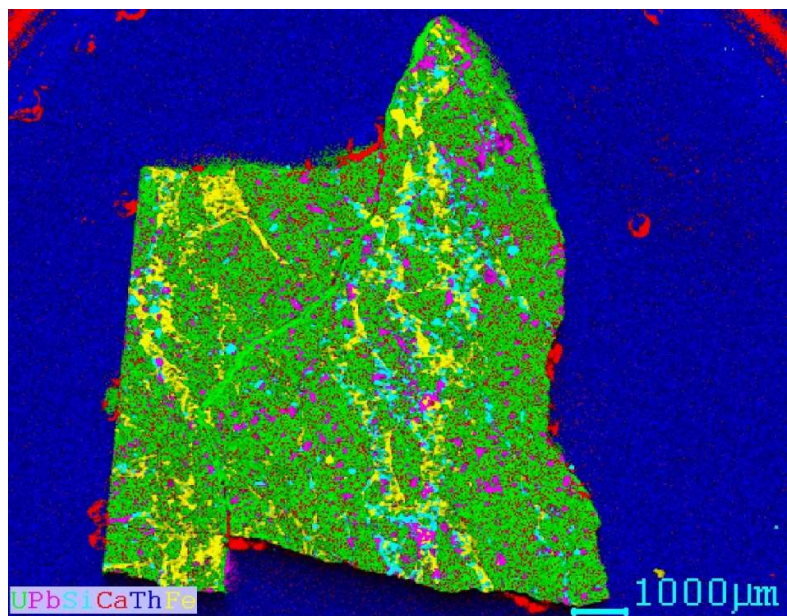

Billiken #522.

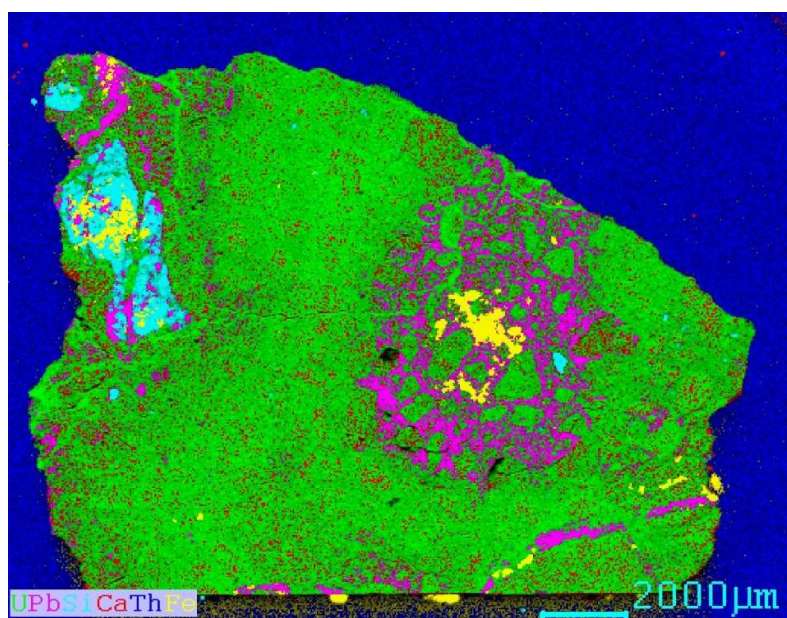

Marshall 1 #531.

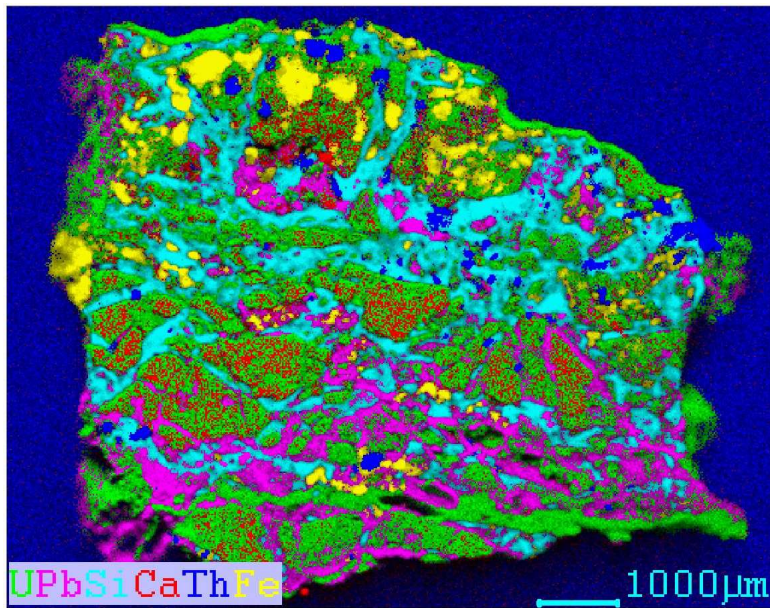

Jachymov #564.

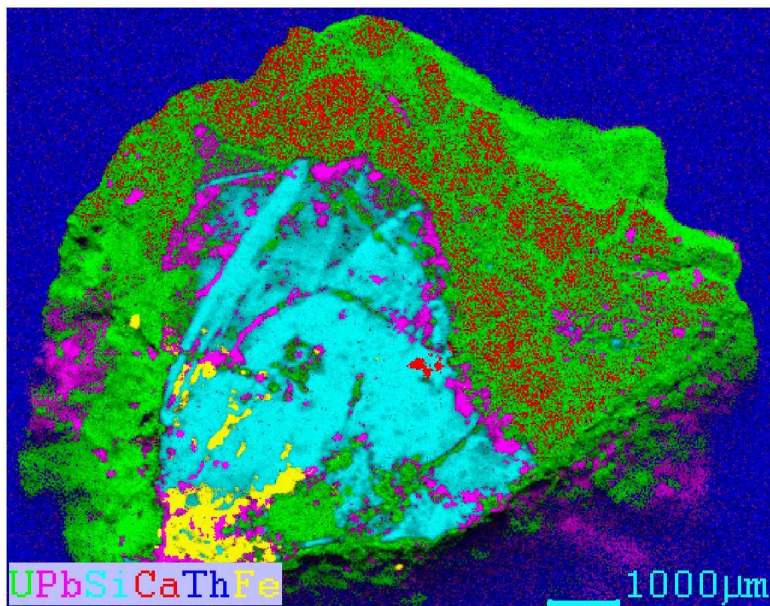

Australia 2 #604.



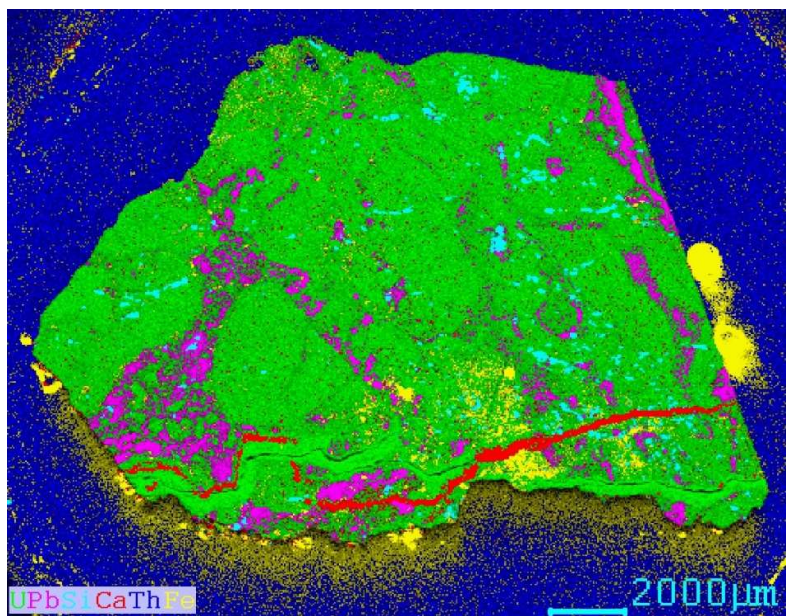

Marshall 2 #623.

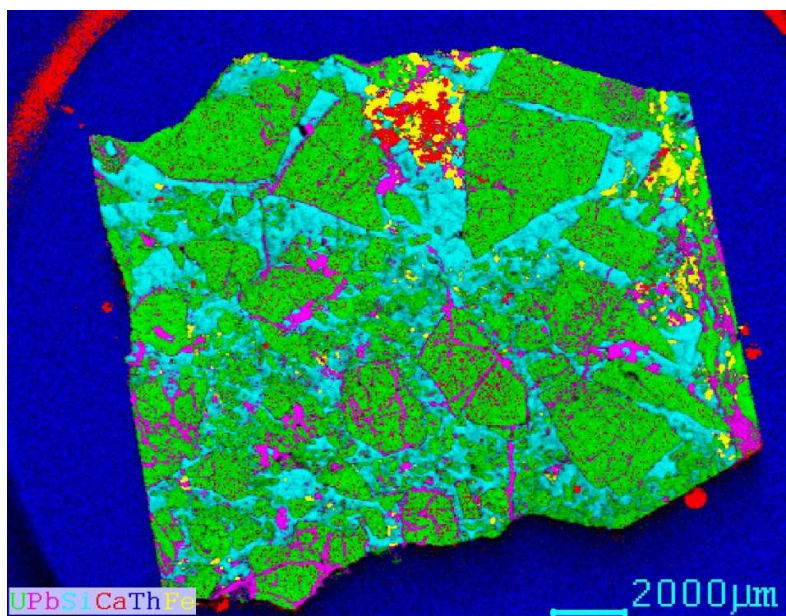

Great Bear 2 #626.

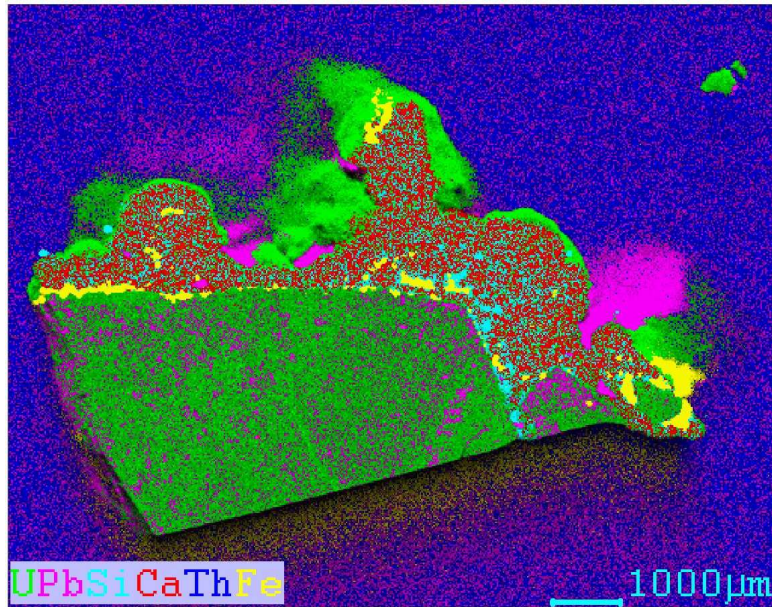

Shinkolobwe 2 #662.

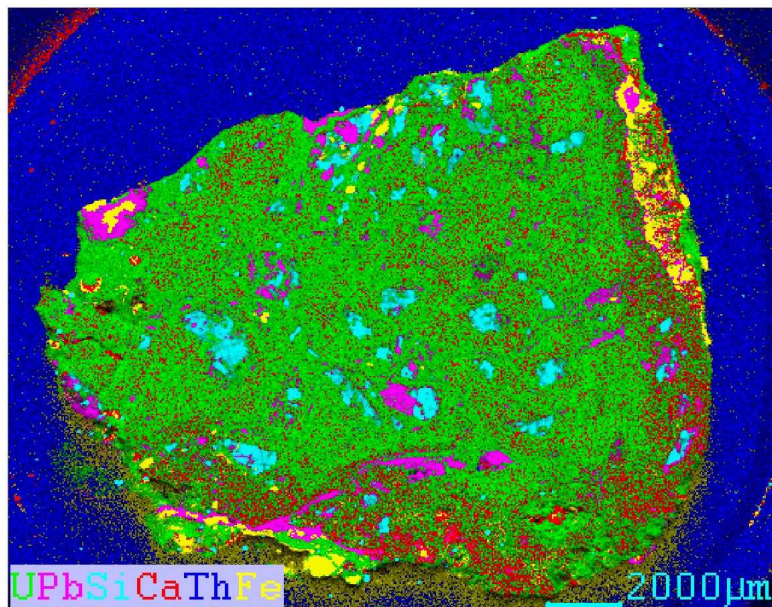

Marshall 3 #809.



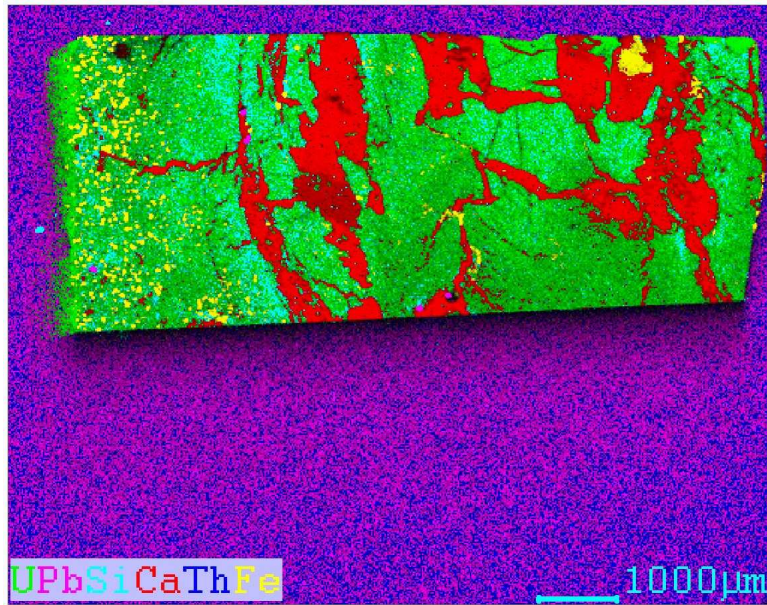

Big Indian Wash 1 #1232.

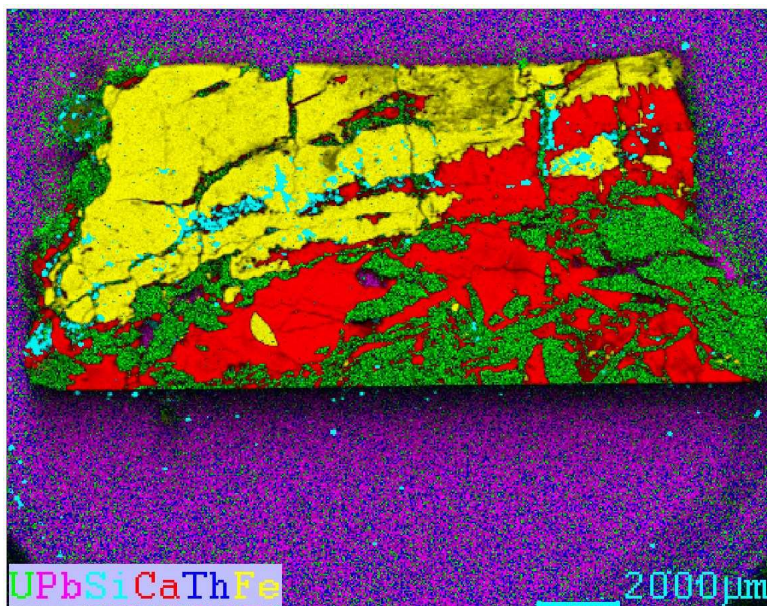

Adair Mine 1 #1237.



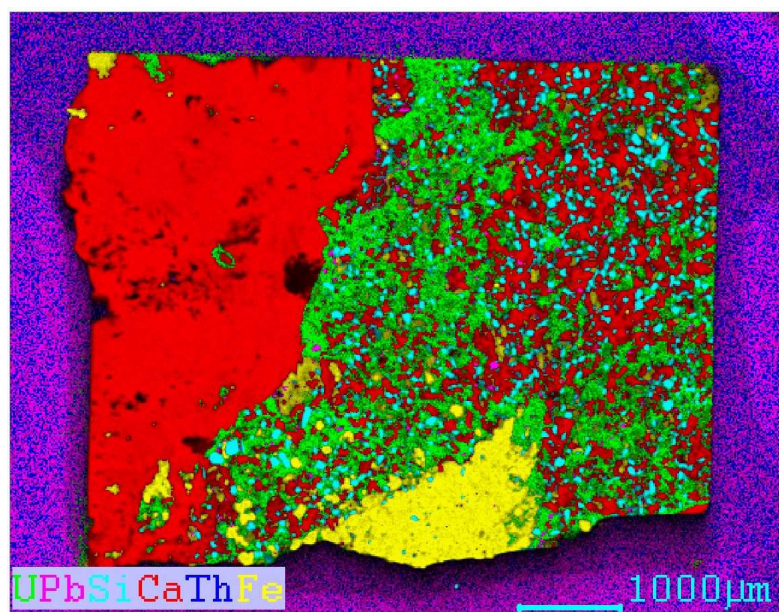

Adair Mine 2 #1262.

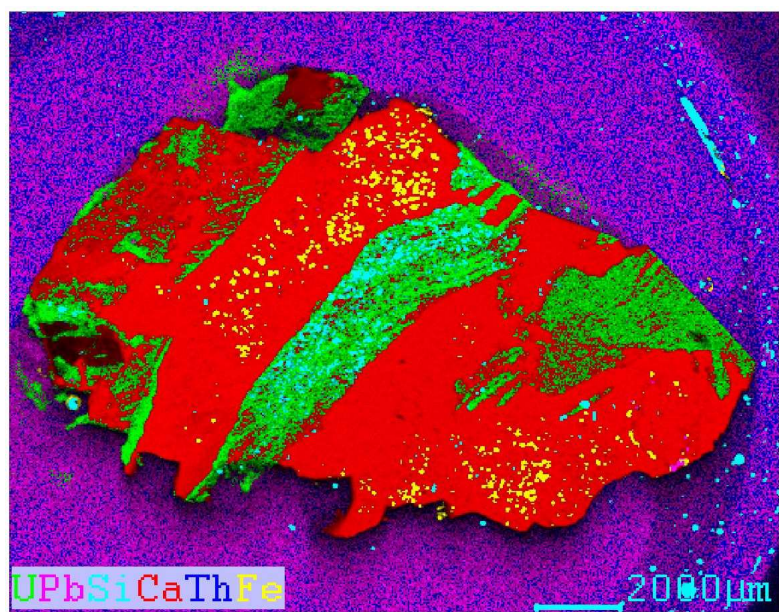

Big Indian Wash 2 #1303.

**Figure S2.** XRF of major elements (U, Pb, Si, Ca, Th, and Fe) for all 23 samples examined in this study.

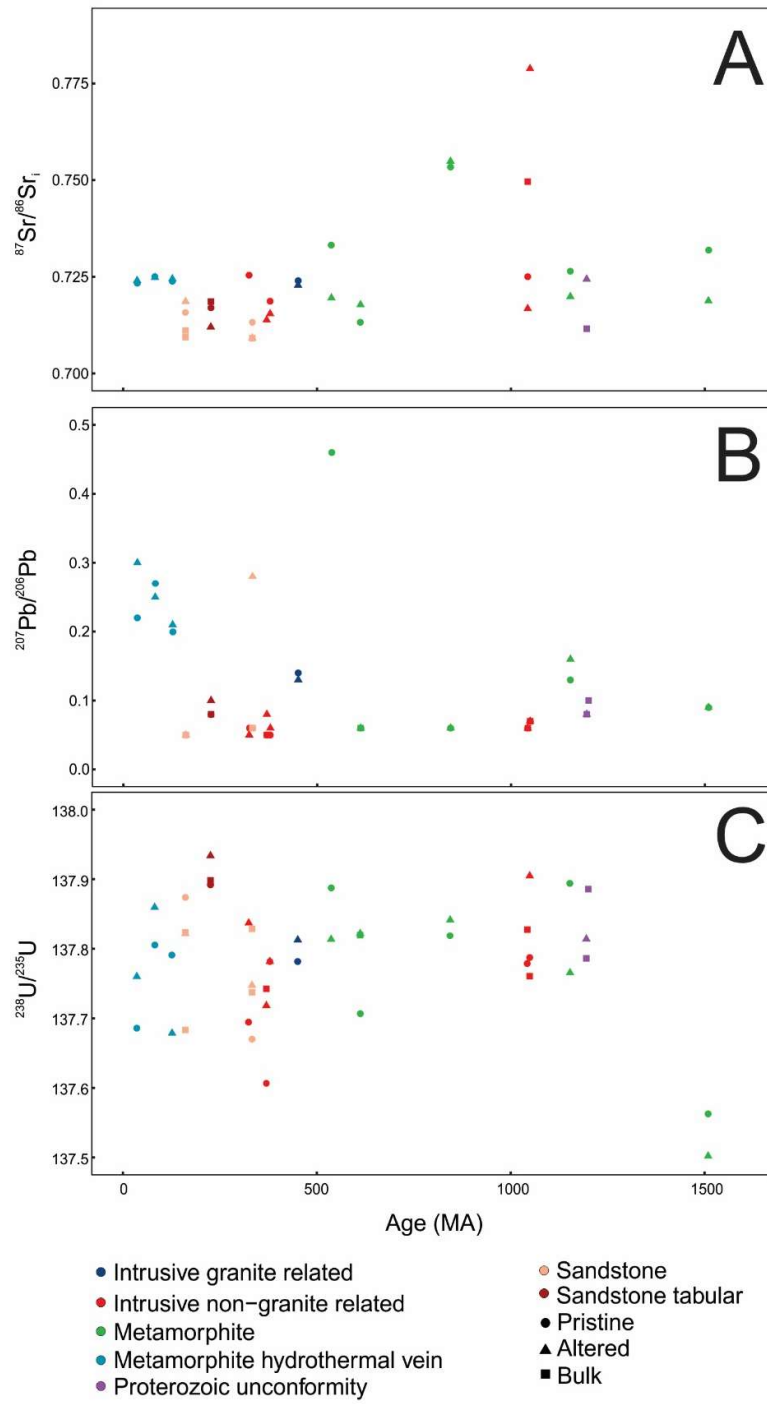

**Figure S3.** Isotopic composition (Table S3) of pristine, altered, and bulk solution aliquots as a function of their age. (A)  $^{87}\text{Sr}/^{86}\text{Sr}_i$ , (B)  $^{207}\text{Pb}/^{206}\text{Pb}$ , and (C)  $^{238}\text{U}/^{235}\text{U}$ .

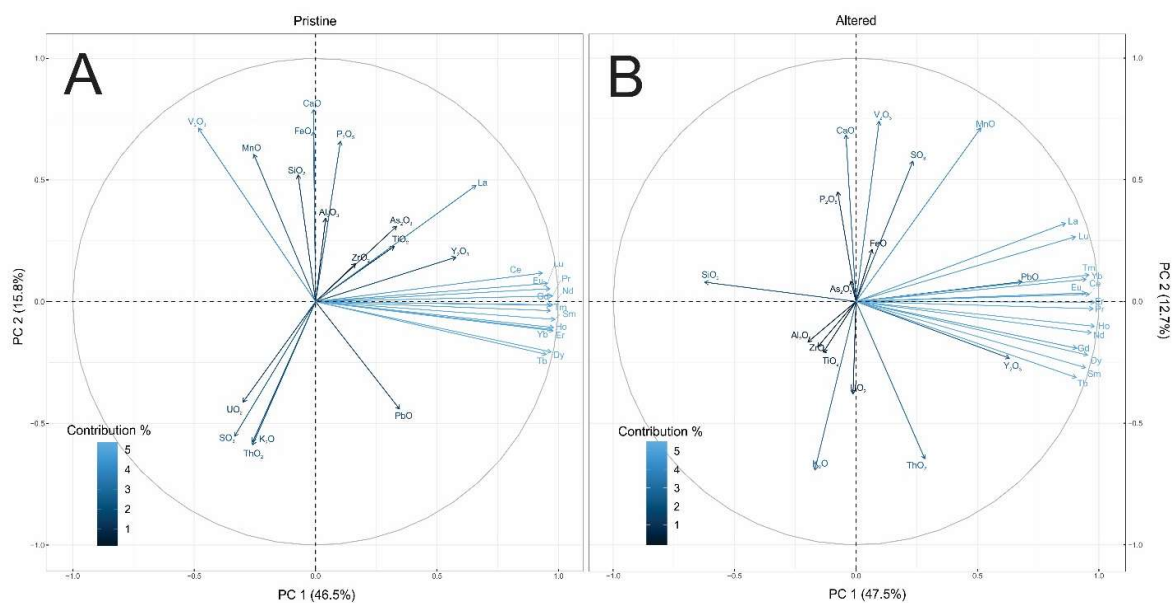

**Figure S4.** Variable contribution (%) to pristine (A) and altered (B) samples for PCA using EMP (wt. %), and REEs (ppm; Figure 9).

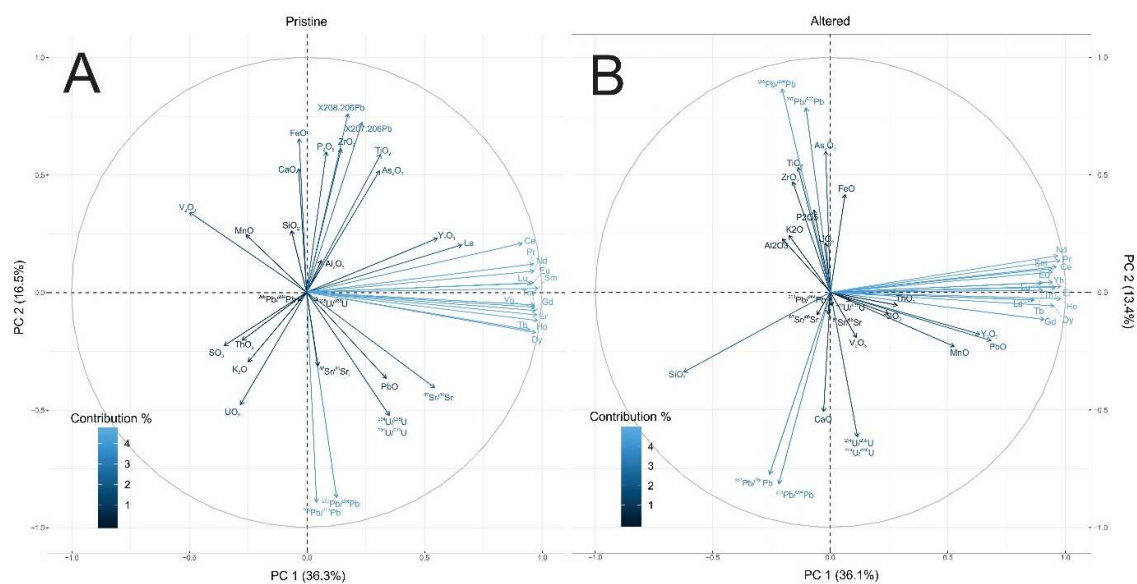

**Figure S5.** Variable contribution (%) to pristine (A) and altered (B) samples for PCA using EMP (wt. %), REEs (ppm) and Sr, Pb, and U isotopic compositions (Figure 10).

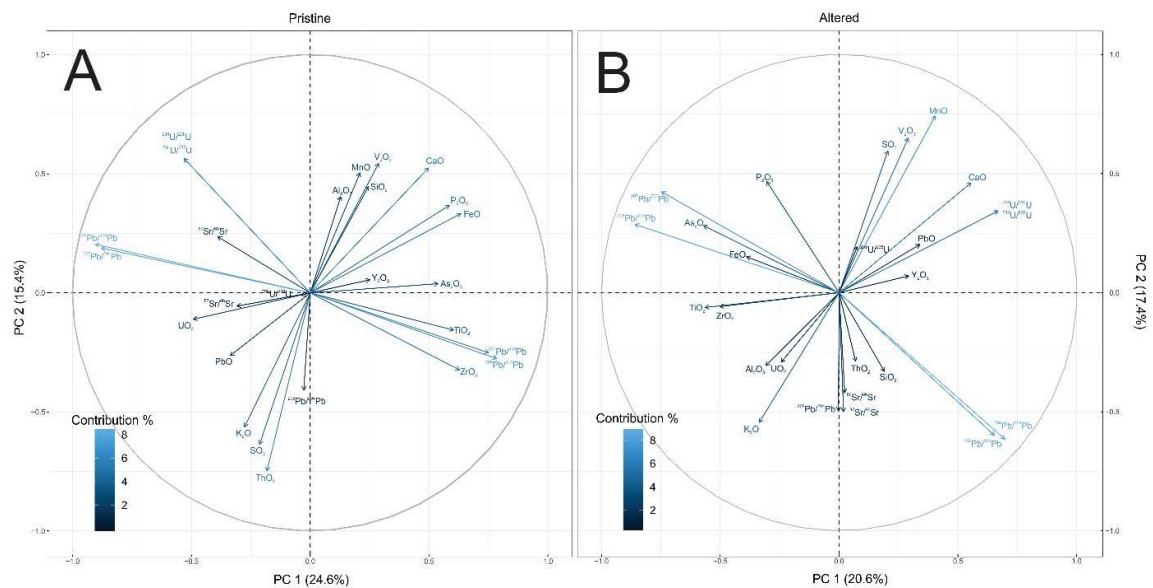

**Figure S6.** Variable contribution (%) to pristine (**A**) and altered (**B**) samples for PCA using EMP (wt. %) and Sr, Pb, and U isotopic compositions (Figure 11).
