# Supplementary material
Source: MDPI journal article supplement (https://www.mdpi.com/2075-163X/9/9/537)
Supplement: s1 [file s1]

Archive with 2 entries (2 files):
- minerals-578256-For XML conversion-Supplementary Figures.pdf
- minerals-578256-For XML conversion-Supplementary Tables.xlsx
