# Supplementary material
Source: MDPI journal article supplement (https://www.mdpi.com/2075-163X/9/9/537)
Supplement: s1 [file s1 › minerals-578256-For XML conversion-Supplementary Tables.xlsx]

## Sheet: S1 Major elements - EMP
Table S1 Major element abundance (wt%). Spot analysis with UO2 > 80 wt % (Pristine) do not have a fill color. Spot analysis with UO2 70 - 80 wt% (Altered) are yellow
No	Sample	Spot	UO2	PbO	ThO2	SiO2	FeO	Al2O3	MnO	TiO2	As2O3	V2O3	CaO	ZrO2	K2O	P2O5	SO3	Y2O3
2	333	333-2	74.11	4.13	3.03	0.16	0	0.01	0	0.07	0	0	0.86	0	0.35	0	0	2.24
7	333	333-9	77.84	3.94	2.47	0.58	0.27	2.08	0.08	0.09	0	0.03	3.08	0.02	1.74	0.14	0.02	0.06
8	333	333-10	75.06	2.88	2.09	0.04	0.09	0.07	0.14	0	0	0	1.26	0	0.49	0.11	0.09	0.52
9	333	333-11	78.82	3.9	2.56	0.25	0	0.09	0	0.06	0	0	1.66	0.07	0.46	0.02	0	0.93
10	333	333-12	77.68	4.38	2.7	0.15	0.03	0.04	0	0.05	0	0	1.53	0.05	0.37	0	0	0.82
12	333	333-14	72.44	3.98	3.58	0.6	0	0.04	0	0.04	0	0	0.99	0.09	0.35	0	0	1.38
14	333	333-16	81.56	4.11	1.58	0.17	0.07	0.05	0.01	0.06	0	0.1	1.39	0	0.48	0.04	0.01	0.82
15	333	333-17	77.55	4.35	2.37	0.16	0	0.05	0	0.07	0.03	0	0.76	0.01	0.6	0	0.16	1.64
16	333	333-18	74.45	4.93	2.86	0.92	0	0.02	0.05	0.04	0	0	0.86	0.01	0.3	0	0	2.08
18	333	333-20	76.68	4.17	2.6	0.19	0	0.07	0.01	0.04	0	0	1.2	0.03	0.6	0	0	1.03
19	333	333-21	78.55	4.35	2.43	0.16	0	0.09	0	0.05	0	0	1.91	0.01	0.46	0	0	1.01
20	333	333-23	72.23	6.01	4.9	0.05	0	0.02	0	0.05	0	0	1.34	0.08	0.8	0	0	0.85
24	333	333-28	78.47	3.78	3.87	0	0	0.01	0	0.06	0	0	0.34	0.02	0.99	0	0	0.63
25	333	333-29	78.8	3	3.5	0.06	0	0.32	0	0.09	0	0	0.13	0.02	1.36	0.01	0	0.47
26	333	333-33	77.47	5.1	3	0.08	0	0.01	0	0.06	0.02	0	0.1	0.01	1.66	0	0	0.5
29	333	333-36	76.15	4.28	4.47	0	0	0.02	0	0.04	0	0	2.59	0.04	1.14	0	0	0.5
30	333	333-37	75.55	4.76	4.91	0.05	0	0.01	0	0.05	0	0	1.36	0.03	0.92	0	0	0.86
32	333	333-42	75.64	3.64	5.35	0.01	0	0.01	0	0.04	0.01	0	1.78	0.01	1.36	0.01	0	0.77
33	333	333-43	74.52	4.44	4.47	0.01	0	0.01	0	0.04	0	0	0.21	0.06	1.15	0	0	0.95
34	333	333-44	81.08	3.96	3.78	0	0	0.02	0	0.06	0	0	0.15	0.02	1.05	0.01	0	0.47
35	333	333-45	77.14	3.87	5.51	0.01	0	0	0	0.06	0	0	0.26	0.03	0.74	0	0	0.76
37	333	333-47	75.39	4.46	5.49	0	0	0.01	0	0.06	0	0	1.12	0.07	0.72	0	0	0.91
38	333	333-48	77.14	4.51	4.26	0.02	0	0.04	0	0.05	0	0	0.16	0	1.26	0	0	0.58
48	334	334-2	72.95	6.49	1.62	0.22	0	0	0	0.04	0	0	0.68	0	0.29	0	0	2.11
52	334	334-6	73.48	6.85	2.32	0.56	0	0.02	0.05	0.05	0	0	0.78	0.04	0.26	0	0	1.33
53	334	334-7	76.59	5.82	2.34	1.36	0	0.01	0	0.04	0	0	0.93	0.02	0.31	0	0	1.26
54	334	334-8	76.08	7.24	1.83	0.46	0	0	0	0.04	0	0	0.88	0.02	0.28	0	0	0.9
56	334	334-10	75.99	7.44	2.22	0.77	0	0.02	0.01	0.05	0	0	1.35	0.08	0.32	0	0	0.9
63	334	334-17	71.11	3.64	2.65	0.21	0	0.02	0	0.04	0	0	0.9	0.05	0.51	0	0	0.89
64	334	334-18	75.9	4.73	3.96	0.36	0.01	0.23	0.01	0.06	0	0	0.5	0.14	0.24	0	0.01	1.89
65	334	334-19	79.82	3.82	4.53	0.79	0	0.02	0	0.06	0	0	0.86	0.11	0.28	0	0	1.71
67	334	334-21	78.27	4.04	3.24	0.15	0	0.01	0	0.05	0	0	1.07	0.04	0.32	0	0	1.19
72	334	334-26	83.1	3.84	2.28	0.48	0	0.02	0	0.07	0	0	1.56	0.05	0.35	0	0	1.15
73	338	338-1	85.8	4.34	2.46	0	0	0.05	0	0.06	0	0	0.62	0	0.2	0	0	1.86
74	338	338-2	85.16	4.39	2.38	0	0	0.03	0	0.07	0	0	0.64	0.01	0.21	0	0	1.78
75	338	338-3	87.79	4.64	2.17	0	0.01	0.02	0	0.04	0	0	0.29	0.04	0.21	0	0	0.64
76	338	338-4	86.55	4.44	1.95	0	0.06	0.12	0	0.06	0	0	0.92	0.05	0.21	0	0	0.68
77	338	338-5	86.48	4.24	1.91	0	0.34	0.12	0	0.05	0	0	0.62	0	0.2	0	0	1.23
78	338	338-6	85.37	4.15	2.51	0	0.03	0.08	0	0.06	0	0	0.54	0	0.21	0	0	1.44
79	338	338-7	84.48	4.47	2.42	0	0.08	0.12	0	0.06	0	0	0.65	0.05	0.22	0	0	1.07
80	338	338-8	84.94	4.54	2.76	0	0.05	0.27	0	0.05	0	0	0.54	0.02	0.21	0	0	1.05
81	338	338-9	86.51	4.15	2.78	0	0.01	0.02	0.01	0.06	0	0	0.27	0.02	0.19	0	0.01	1.36
82	338	338-10	88.13	4.25	1.97	0	0.02	0.03	0	0.07	0	0	0.42	0.01	0.21	0	0	1.08
83	338	338-11	86.14	4.48	2.5	0	0.02	0.05	0.01	0.07	0	0	0.41	0.01	0.21	0	0.01	1.37
84	338	338-12	86.85	4.21	2.25	0	0.06	0.05	0	0.06	0	0	0.44	0.04	0.21	0.01	0.01	1.1
85	338	338-13	86.51	4.62	2.27	0	0	0.06	0	0.05	0	0	0.47	0.03	0.2	0	0	1.11
86	338	338-16	85.06	3.87	2.45	0	0.07	0.1	0	0.06	0	0	0.35	0	0.21	0	0	1.87
87	338	338-17	85.66	4.26	2.24	0	0.04	0.13	0.01	0.04	0	0	0.55	0	0.22	0	0.01	1.3
88	338	338-18	85.97	3.99	2.22	0	0.01	0.06	0	0.07	0	0	0.44	0	0.22	0	0	1.73
89	338	338-19	87.08	4.28	2.58	0	0	0.01	0	0.06	0	0	0.4	0.01	0.21	0	0.01	1.45
90	338	338-20	85.58	4.33	2.52	0	0.03	0.09	0	0.07	0	0	0.42	0	0.21	0	0	1.66
91	338	338-21	85.2	4.34	2.7	0	0.03	0.06	0	0.06	0	0	0.36	0	0.2	0	0.01	1.64
92	338	338-23	86.22	4.26	2.76	0	0.05	0.09	0	0.06	0	0	0.42	0.01	0.2	0	0	1.66
93	338	338-24	85.99	4.28	1.81	0	0.02	0.16	0	0.05	0	0	0.76	0	0.21	0	0	1.4
94	338	338-25	86.19	4.06	2.53	0	0	0.01	0	0.06	0	0	0.74	0.01	0.2	0	0	1.51
95	338	338-26	85.78	4.29	2.22	0	0.02	0.08	0	0.06	0	0	0.49	0.02	0.21	0.01	0.01	1.44
96	338	338-27	87.4	4.14	2.47	0	0.06	0.08	0	0.06	0	0	0.33	0	0.2	0	0.03	1.24
97	338	338-28	87.01	4.02	2.21	0	0.04	0.07	0	0.06	0	0	0.57	0.02	0.19	0	0	1.45
98	338	338-29	87.77	4.29	1.78	0	0.02	0.03	0	0.05	0	0	0.77	0	0.22	0	0	0.76
99	338	338-30	86.58	4.21	2.4	0	0.04	0.1	0	0.06	0	0	0.51	0	0.2	0	0	1.46
100	338	338-31	85.07	4.42	3.6	0	0.01	0.07	0.01	0.06	0	0	0.53	0.06	0.2	0	0	1.08
139	344	344-5	79.76	10.5	0.31	0	0	0.01	0.01	0.04	0	0	0.28	0.09	2.41	0.01	3.87	0.01
140	344	344-5B	78.96	4.19	0.71	1.84	0	0.03	0	0.06	0.01	0	2.51	0.2	1.99	0.06	1.73	0.02
141	344	344-6	88.94	4.04	0.56	0	0	0	0	0.06	0	0	0.23	0.04	0.48	0	1.47	0.03
142	344	344-7	88.05	4.09	0.64	0	0	0.01	0	0.06	0	0	0.21	0.02	0.52	0.01	1.54	0
143	344	344-8	87.99	4.1	0.64	0	0	0	0.04	0.06	0	0	0.22	0.02	0.56	0.01	1.52	0.01
144	344	344-9	87.77	3.53	0.75	0	0	0.01	0.01	0.07	0	0	0.32	0.11	1	0.01	1.35	0
145	344	344-10	87.02	3.87	0.62	0	0	0	0	0.06	0	0	0.54	0.04	0.66	0	1.43	0.03
146	344	344-11	87.39	3.6	0.67	0	0	0.01	0	0.07	0	0	0.42	0	0.69	0.02	1.32	0
147	344	344-12	85.87	4.69	0.92	0	0	0	0	0.07	0	0	0.26	0.04	0.62	0	1.78	0
148	344	344-13	88.55	4.18	0.47	0	0	0.01	0	0.06	0	0	0.25	0.07	0.85	0	1.51	0
149	344	344-14	87.86	4.14	0.55	0	0	0	0	0.07	0	0	0.22	0	0.6	0	1.52	0.02
150	344	344-15	88.93	4.27	0.54	0	0	0	0	0.06	0	0	0.2	0	0.55	0	1.55	0
151	344	344-16	86.75	4.41	0.41	0	0	0	0	0.05	0	0	0.29	0.02	0.6	0	1.61	0.01
152	344	344-17	89.95	4.04	0.5	0	0	0	0	0.07	0	0	0.24	0	0.54	0	1.51	0.01
153	344	344-18	91.46	4.12	0.35	0	0.01	0	0	0.07	0	0	0.26	0	0.52	0.01	1.48	0
154	344	344-19	90.12	3.81	0.66	0	0	0	0	0.06	0.02	0	0.2	0	0.4	0.01	1.39	0.01
155	344	344-20	90.65	3.79	0.72	0	0	0.01	0.01	0.05	0	0	0.34	0.02	0.59	0	1.38	0.02
156	344	344-21	88.08	4.14	0.69	0	0.01	0	0	0.07	0	0	0.19	0.05	0.49	0	1.55	0.02
157	344	344-22	90.88	3.85	0.7	0	0	0	0.01	0.09	0	0	0.19	0.03	0.4	0	1.39	0.02
158	344	344-23	90.24	3.95	0.45	0	0	0	0	0.06	0	0	0.18	0.05	0.43	0.01	1.46	0
159	344	344-24	90.32	3.64	0.43	0	0	0.01	0	0.06	0	0	0.21	0.01	0.48	0	1.32	0.02
160	344	344-26	88.65	4.54	0.58	0	0	0.01	0	0.05	0	0	0.32	0.03	0.6	0	1.6	0.01
161	344	344-27	86.22	4.59	0.48	0	0	0.02	0	0.06	0.01	0	0.24	0.19	0.81	0	1.7	0.03
162	344	344-28	89.81	3.53	0.57	0	0.01	0.01	0	0.06	0	0	0.31	0.05	0.56	0.01	1.24	0.01
163	344	344-29	88.47	3.95	0.6	0	0	0.01	0	0.07	0	0	0.22	0.05	0.77	0	1.5	0.05
164	344	344-30	87.48	4.67	0.53	0	0	0	0	0.07	0.01	0	0.23	0	0.85	0	1.65	0
165	344	344-31	84.42	6.29	0.43	0	0	0.01	0	0.05	0	0	0.32	0.01	1.39	0.01	2.31	0
166	344	344-32	87.17	3.24	0.54	0	0.01	0.01	0.01	0.07	0	0	0.68	0.02	2.85	0.01	1.16	0
167	344	344-33	87.53	4.13	0.54	0	0	0.02	0	0.06	0.01	0	0.31	0	0.8	0.01	1.53	0.03
168	344	344-34	88.9	3.81	0.64	0	0	0.01	0	0.06	0	0	0.25	0.04	0.9	0.02	1.44	0.02
169	344	344-35	88.24	3.9	0.56	0	0	0.01	0	0.07	0.01	0	0.2	0.02	0.49	0.01	1.48	0.01
170	344	344-36	87.01	4.03	0.68	0	0	0.01	0.01	0.07	0	0	0.31	0.04	1.55	0	1.5	0.01
171	344	344-41	86.12	4.37	0.65	0	0	0	0	0.06	0.02	0	0.45	0	1.02	0.01	1.63	0
172	344	344-42	89.12	3.85	0.48	0	0	0	0	0.06	0	0	0.2	0	0.56	0.02	1.43	0.02
173	344	344-43	91.42	3.52	1.02	0	0.01	0.02	0.03	0.07	0	0	0.3	0.09	0.59	0.01	1.31	0.02
174	344	344-44	89.95	3.82	0.5	0	0.01	0	0	0.05	0	0	0.21	0.01	0.6	0.01	1.43	0.02
175	344	344-45	86.97	3.9	0.54	0	0	0	0	0.05	0	0	0.21	0.02	0.62	0	1.44	0.02
176	344	344-46	88.89	2.88	0.79	0	0.02	0.01	0	0.06	0	0	0.26	0.03	0.68	0.02	1.11	0
177	344	344-47	87.97	4.08	0.38	0	0	0	0	0.05	0	0	0.24	0.02	1.05	0	1.5	0
178	344	344-48	87.23	4.37	0.48	0	0	0	0	0.06	0	0	0.22	0.01	0.66	0.01	1.61	0.02
179	344	344-49	87.39	4.4	0.63	0	0.01	0.01	0	0.04	0.01	0	0.25	0.02	1.12	0	1.66	0.01
180	344	344-50	86.85	3.53	0.44	0	0.01	0.01	0	0.05	0	0	0.3	0.02	0.94	0	1.28	0
181	344	344-51	90.94	3.1	0.59	0	0.01	0.01	0	0.07	0	0	0.25	0.03	0.53	0	1.17	0
182	344	344-52	89.55	4.06	0.96	0	0	0	0	0.06	0	0	0.32	0.06	0.46	0	1.48	0.01
183	344	344-53	87.88	4.4	0.54	0	0	0.02	0	0.07	0	0	0.25	0.02	0.82	0.01	1.63	0
184	344	344-54	88.89	3.52	0.47	0	0	0	0	0.06	0	0	0.26	0.1	0.52	0.01	1.32	0.03
185	344	344-55	88.76	4.35	0.55	0	0.01	0	0	0.06	0	0	0.26	0.02	0.53	0.01	1.59	0.02
186	344	344-56	87.78	2.81	0.72	0.26	0.02	0.42	0.01	0.05	0	0	0.54	0.17	0.63	0.01	1.06	0.03
187	344	344-57	90.16	4.11	0.84	0	0.01	0.01	0	0.06	0.01	0	0.2	0.07	0.38	0	1.42	0.02
188	344	344-58	90.74	3.8	0.54	0	0	0	0	0.07	0	0	0.3	0	0.44	0.01	1.35	0.02
195	348	348-7	77.99	1.29	0.03	1.52	1.94	2.88	0.18	0.05	0.01	0	1.09	0.11	0.33	1.92	0	0.19
196	348	348-10	75.61	2.49	0.01	0.5	2.44	0.31	0.27	0.01	0.01	0.01	1.85	0.25	0.23	0.61	0.01	0.41
197	348	348-11	80.46	2.69	0.27	1.8	0.22	0.48	0.34	0.07	0	0	3.77	0.47	0.25	0.2	0	0.23
198	348	348-12	79.66	0.79	0.37	1.48	0.55	0.37	0.54	0.07	0	0	4.32	0.18	0.26	0.35	0	0.19
199	348	348-13	82.22	0.82	0.03	0.83	0.33	0.26	1.23	0.05	0	0	4.67	0	0.26	0.5	0	0.15
201	348	348-20	81.45	0.31	0.36	1.36	0.58	0.49	1.07	0.06	0	0	4.69	0.05	0.25	0.41	0	0.09
203	348	348-25	73.53	0.35	0.98	0.61	7.96	0.2	0.37	0.07	0	0	1.9	0.39	0.29	1.07	0	0.54
210	353	353-1	89.54	0.25	0	0	0.13	0.04	0.02	0.11	0.03	0.39	2.99	0.23	0.14	0.17	0.06	0.15
213	353	353-4	90.06	0.25	0.01	0	0.14	0.04	0.01	0.09	0.02	0.36	3.05	0.25	0.14	0.18	0.04	0.2
215	353	353-6	89.75	0.49	0	0	0.32	0.03	0.02	0.11	0.02	0.4	2.68	0.25	0.16	0.19	0.03	0.17
217	353	353-8	88.17	0.53	0.03	0	0.43	0.06	0.08	0.13	0	0.39	2.65	0.22	0.18	0.17	0.74	0.17
219	353	353-10	82.9	0.61	0	0	0.36	0.61	0.13	0.09	0.05	0.4	2.28	0.22	0.17	0.42	2.25	0.23
221	353	353-13	86.15	0.59	0.02	0	0.33	0.23	0.1	0.21	0.05	0.35	2.29	0.23	0.18	0.31	0.98	0.22
222	353	353-15	78.2	0.4	0.01	0	0.28	0.22	0.08	0.16	0.04	0.33	2.25	0.24	0.17	0.31	4.75	0.19
224	353	353-18	88.62	0.66	0	0	0.65	0.04	0.08	0.48	0.01	0.36	2.65	0.26	0.19	0.25	0.01	0.18
225	353	353-19	85.75	0.6	0	0	0.41	0.09	0.05	0.36	0.02	0.33	2.36	0.24	0.2	0.22	0.07	0.15
226	353	353-20	86.47	0.4	0	0	0.25	0.07	0.04	0.31	0.05	0.36	2.73	0.21	0.17	0.2	1.92	0.18
228	353	353-22	89.57	0.29	0	0	0.2	0.02	0.03	0.31	0.05	0.34	3.11	0.3	0.19	0.19	0.06	0.19
230	353	353-24	73.03	0.9	0	3.13	0.55	5.26	0.08	0.55	0.15	0.3	1.19	0.45	0.48	0.52	0.52	0.27
231	353	353-25	80.16	1.12	0	1.25	0.37	2.99	0.1	1.09	0.23	0.31	1.34	0.55	0.37	0.71	0.71	0.32
234	353	353-28	85.85	0.6	0	0	0.46	0.34	0.09	0.79	0.01	0.32	2.39	0.56	0.18	0.3	1.86	0.13
235	353	353-29	84.12	0.77	0	0	0.26	0.2	0.1	0.31	0.11	0.38	2.43	0.34	0.18	0.27	1.34	0.23
237	353	353-31	90.16	0.86	0	0	0.61	0.04	0.1	0.26	0.01	0.28	2.45	0.25	0.18	0.23	0	0.16
238	353	353-32	79.06	0.65	0	0	0.37	0.1	0.07	0.74	0.08	0.3	1.98	0.5	0.17	0.28	4.15	0.13
240	353	353-34	81.04	0.54	0.02	0	0.23	0.12	0.08	0.54	0.08	0.34	2.12	0.48	0.15	0.22	5	0.19
241	423	423-6	73.95	9.88	0	0.05	0.24	0.13	1.11	0.06	0.46	0.59	4.6	0	0.12	0.46	0.16	0.47
242	423	423-7	74.84	9.89	0.02	0.01	0.24	0.07	1.37	0.05	0.43	0.4	4.83	0	0.12	0.31	0.34	0.54
243	423	423-8	74.7	8.67	0.11	0.02	0.24	0.06	1.27	0.05	0.41	0.4	5.26	0	0.12	0.57	0.52	0.51
244	423	423-9	75.05	8.33	0.17	0.06	0.27	0.06	1.41	0.05	0.43	0.46	5.49	0	0.11	0.38	0.35	0.47
245	423	423-10	76.81	5.48	0.1	0.04	0.34	0.07	1.7	0.05	0.42	0.48	6.63	0	0.12	0.38	0.3	0.52
248	423	423-15	73.53	5.96	0.4	0.04	0.35	0.03	1.87	0.05	0.32	0.54	6.66	0	0.13	0.92	1.52	0.39
249	423	423-16	75.55	9.18	0.12	0	0.4	0.06	1.62	0.07	0.36	0.55	5.26	0	0.13	0.42	0.69	0.42
250	423	423-18	71.21	11.71	0.13	0.02	0.22	0.04	1.47	0.05	0.28	0.48	5.85	0	0.14	0.66	0.71	0.38
251	423	423-18A	71.94	8.53	0.29	0.08	0.3	0.07	1.82	0.04	0.27	0.56	6.08	0	0.13	0.49	1.29	0.36
252	423	423-18B	73.81	11.94	0.05	0	0.18	0.09	0.93	0.05	0.3	0.44	4.5	0	0.15	0.37	0.51	0.36
254	423	423-22	74.69	11.28	0.02	0	0.21	0.09	0.96	0.06	0.34	0.41	4.45	0.01	0.14	0.2	0.15	0.47
255	423	423-23	73.42	9.28	0.19	0.02	0.23	0.06	1.56	0.04	0.25	0.49	5.92	0	0.14	0.61	0.69	0.45
256	423	423-23A	74.96	7.37	0.21	0.02	0.27	0.03	1.62	0.05	0.28	0.5	6.61	0	0.13	0.69	0.81	0.4
257	423	423-24	73.01	8.04	0.32	0.01	0.26	0.12	1.66	0.05	0.29	0.52	6.49	0	0.13	0.72	1.11	0.4
258	423	423-25A	75.7	9.03	0.08	0	0.35	0.14	1.27	0.05	0.34	0.47	4.75	0	0.14	0.16	0.78	0.41
259	423	423-30A	74.23	8.72	0	0	0.34	0.12	1.44	0.04	0.27	0.37	5.98	0	0.14	0.91	0.07	0.49
260	423	423-30B	73.26	7.83	0.43	0.03	0.37	0.05	1.5	0.04	0.25	0.49	4.92	0	0.14	0.39	2.03	0.4
261	423	423-30C	75.22	8.31	0.11	0.02	0.37	0.05	1.36	0.05	0.35	0.47	5	0	0.14	0.37	0.43	0.46
264	423	423-33	71.56	14.05	0	0	0.11	0.07	0.98	0.05	0.33	0.43	4.39	0	0.13	0.18	0.2	0.41
265	423	423-34	72.89	12.03	0.01	0.02	0.26	0.09	0.9	0.06	0.25	0.62	3.94	0	0.15	0.22	1.1	0.4
266	423	423-35	70.21	14.78	0.04	0.03	0.29	0.03	1.65	0.05	0.3	0.48	5.22	0	0.14	0.43	2.3	0.41
269	423	423-38	72.1	11.9	0.04	0.01	0.28	0.11	1.15	0.06	0.33	0.47	4.37	0	0.14	0.32	0.38	0.42
270	423	423-39	73.72	11.66	0.05	0	0.22	0.09	0.87	0.05	0.42	0.64	3.94	0	0.16	0.46	0.91	0.4
271	423	423-39A	74.51	7.81	0.15	0	0.37	0.03	1.91	0.06	0.33	0.54	5.19	0	0.15	0.4	0.65	0.42
272	423	423-39B	72.28	9.82	0.21	0	0.32	0.07	1.5	0.03	0.32	0.54	5.28	0	0.13	0.68	0.88	0.42
273	423	423-40	72.67	9.11	0.1	0.01	0.24	0.04	1.25	0.06	0.31	0.38	5.9	0	0.14	0.75	0.75	0.51
274	423	423-41	72.35	9.44	0.11	0.02	0.2	0.05	1.28	0.05	0.28	0.35	6.44	0	0.15	0.88	0.64	0.52
275	423	423-41A	71.31	10.54	0.16	0.03	0.34	0.09	1.52	0.05	0.29	0.51	4.7	0	0.14	0.43	0.99	0.44
276	423	423-42	72.12	12.02	0.05	0	0.28	0.03	1.22	0.06	0.35	0.45	4.5	0	0.14	0.25	0.28	0.42
278	423	423-44	70.67	13.28	0.01	0.03	0.1	0.04	1.01	0.05	0.3	0.46	4.62	0	0.14	0.47	0.14	0.45
279	423	423-45	71.21	13.42	0.01	0.01	0.17	0.03	1.06	0.06	0.34	0.48	4.55	0	0.14	0.38	0.18	0.42
280	423	423-46	72.81	10.13	0.14	0.02	0.2	0.04	1.14	0.05	0.33	0.32	5.2	0	0.14	0.57	0.72	0.45
281	423	423-46A	72.69	8.73	0.11	0	0.22	0.02	1.53	0.05	0.32	0.34	6.73	0	0.13	0.69	0.8	0.48
282	423	423-47	72.01	10.02	0.27	0	0.31	0.04	1.55	0.06	0.29	0.53	4.65	0.03	0.13	0.31	1.39	0.45
283	423	423-48	72.28	12.72	0.01	0.01	0.18	0.03	1.16	0.05	0.33	0.47	4.78	0	0.15	0.52	0.29	0.42
284	423	423-49	74.38	8.04	0.12	0	0.32	0.11	1.88	0.05	0.32	0.49	5.32	0	0.13	0.75	0.46	0.47
285	423	423-50	71.98	12.9	0	0	0.22	0.09	0.78	0.05	0.39	0.48	3.72	0	0.15	0.47	0.13	0.4
286	423	423-51	70.71	10.88	0.05	0.17	0.07	0.06	0.19	0.05	0.78	1.07	1.5	0	0.19	0.87	0.29	0.19
287	423	423-52	72.37	10.49	0.14	0.04	0.24	0.03	1.31	0.05	0.31	0.45	4.73	0	0.15	0.23	1.26	0.45
289	423	423-54	70.54	11.22	0.14	0	0.22	0.04	1.41	0.05	0.29	0.39	6.34	0	0.14	0.9	1.09	0.39
290	423	423-55	70.89	12.14	0.03	0	0.2	0.04	1.19	0.06	0.32	0.47	5.81	0	0.13	1.26	0.39	0.4
291	423	423-56	73.31	8.81	0.11	0.01	0.35	0.06	1.76	0.04	0.39	0.55	4.69	0.02	0.14	0.38	0.83	0.41
292	437	437-1	88.52	7.22	0.07	0.02	0	0.01	0.02	0.05	0	0	0.51	0	0.19	0.01	0	0.06
294	437	437-3	79.76	8.72	0	0.02	0	0.2	0.01	0.05	0	0	1.03	0	0.3	0.01	0	0.02
295	437	437-4	88.49	7.25	0.02	0.02	0.01	0.01	0.01	0.05	0	0	0.49	0.03	0.2	0.02	0	0.04
296	437	437-5	88.5	7.34	0.01	0.03	0.01	0.01	0.04	0.07	0.02	0	0.47	0	0.18	0.01	0	0.03
298	437	437-9	88.64	7.22	0	0.03	0	0.01	0	0.07	0.02	0	0.43	0	0.19	0.02	0	0.04
299	437	437-10	88.81	7.54	0	0.06	0.01	0.01	0.01	0.06	0.01	0	0.61	0	0.19	0.04	0	0.06
300	437	437-11	89.3	7.2	0	0.05	0	0.02	0	0.05	0	0	0.55	0	0.19	0.02	0.01	0.03
301	437	437-12	88.48	7.1	0	0.07	0.02	0.01	0.01	0.05	0	0	0.73	0	0.18	0.01	0.03	0.03
302	437	437-13	88.33	7.24	0.02	0.02	0	0.02	0.03	0.06	0	0	0.47	0.04	0.19	0.02	0	0.06
303	437	437-14	88.21	7.31	0	0.03	0.01	0.01	0.02	0.07	0	0	0.47	0.01	0.19	0.02	0	0.04
304	437	437-15	88.06	7.12	0.01	0.06	0.01	0.05	0	0.04	0	0	0.71	0.02	0.19	0.02	0.01	0.06
305	437	437-16	89.11	7.2	0	0.03	0	0.06	0	0.06	0	0	0.46	0.03	0.19	0.02	0	0.07
306	437	437-17	86.47	7.21	0.01	0.12	0.02	0.03	0	0.07	0	0	0.95	0.01	0.19	0.02	0.1	0.02
307	437	437-18	88.79	7.35	0	0.02	0.01	0.04	0.02	0.06	0.01	0	0.54	0.03	0.18	0.02	0	0.03
308	437	437-19	87.93	7.35	0	0.01	0	0.01	0	0.06	0	0	0.42	0.01	0.19	0	0	0.04
309	437	437-20	88.17	6.89	0	0.07	0.01	0.01	0	0.06	0.01	0	0.77	0	0.19	0.03	0.01	0.03
310	437	437-24	88.22	7.23	0.01	0.03	0.01	0.02	0.01	0.07	0	0	0.64	0	0.2	0.01	0	0.04
311	437	437-25	87.95	7.13	0	0.08	0.02	0.04	0.02	0.06	0.01	0	0.62	0.01	0.18	0.02	0.01	0
312	437	437-26	88.55	6.89	0	0.06	0.01	0.01	0	0.06	0	0	0.55	0.02	0.19	0.02	0.01	0.04
313	437	437-27	88.44	6.86	0	0.06	0.02	0.01	0.01	0.07	0	0	0.75	0	0.2	0.01	0	0.02
314	437	437-28	88.87	7.22	0.01	0.04	0.01	0.01	0.02	0.07	0	0	0.53	0	0.19	0.03	0.01	0.04
349	511	511-38	71.33	20.38	0	0.09	0	0.1	0	0.02	0	0.01	0.97	0	0.81	0.02	0	0
353	516	516-1B	74.8	10.69	0	2.67	0.08	3.74	0	0.26	0	0.03	0.27	0.01	0.87	0.04	0	0.05
354	516	516-2B	84.95	1.02	0	0.91	0	0.06	0	0.21	0.01	0.06	0.22	0	0.25	0.08	0	0.06
355	516	516-3B	85.29	1.58	0	0.53	0	0.07	0	0.21	0	0.13	0.24	0	0.3	0.09	0	0.05
356	516	516-4B	83.19	3.32	0	1.14	0.01	0.15	0	0.23	0	0.09	0.2	0.01	0.4	0.11	0	0.05
357	516	516-5B	80.94	6.31	0.01	1.09	0.2	0.41	0	0.26	0	0.12	0.21	0	0.59	0.11	0	0.08
358	516	516-6B	85.26	1.82	0	1.18	0.03	0.01	0	0.22	0.01	0.13	0.16	0	0.35	0.1	0.01	0.07
359	516	516-7B	79.2	10.67	0	0.54	0.01	0.28	0	0.2	0	0.11	0.2	0	0.78	0.13	0	0.07
360	516	516-8B	86.61	4.94	0	1.44	0.09	0.19	0.05	0.11	0	0.06	1.5	0.04	0.38	0.08	0	0.18
361	516	516-9B	85.05	5.39	0.02	1.24	0.1	0.07	0.04	0.12	0.02	0.06	1.53	0	0.39	0.15	0	0.17
362	516	516-10B	83.07	7.38	0	0.15	0.07	0.09	0.02	0.14	0	0.01	1.02	0	0.59	0.05	0	0.13
364	516	516-12B	81.57	7.29	0	1.25	0.02	0.25	0	0.18	0.01	0.08	0.47	0	0.6	0.09	0	0.11
366	516	516-14B	86.46	5.21	0	0.2	0.06	0.27	0.05	0.13	0.01	0.08	1.22	0	0.4	0.08	0	0.15
367	516	516-15B	73.57	4.07	0	6.75	0.06	10.61	0	0.13	0	0.11	2.39	0.03	0.65	0.05	0.01	0.07
368	516	516-16B	84.29	7.59	0	0.38	0.08	0.38	0.03	0.13	0.03	0.04	1.12	0	0.53	0.09	0	0.15
369	516	516-17B	85.01	6.42	0.03	0.15	0.11	0.19	0.03	0.11	0.02	0.04	1.29	0.01	0.59	0.05	0	0.18
370	516	516-18B	72.96	15.93	0	0.1	0	0.37	0	0.05	0	0	0.13	0	0.75	0.01	0	0.03
371	516	516-19B	84.68	6.14	0	0.54	0.1	0.2	0.02	0.12	0.01	0.03	1.3	0	0.48	0.05	0	0.15
372	516	516-20B	85.87	5.67	0.02	0.42	0.08	0.23	0.05	0.13	0.01	0.04	1.12	0	0.62	0.05	0	0.15
373	516	516-21B	86.09	6.14	0.02	0.94	0.1	0.69	0.03	0.12	0.01	0.05	1.44	0	0.35	0.06	0	0.18
374	516	516-22B	85.81	5.89	0	0.51	0.09	0.31	0.01	0.14	0.01	0.08	1.66	0.04	0.3	0.07	0	0.18
375	516	516-23B	87.03	5.13	0	1.22	0.08	0.41	0.03	0.11	0.02	0.02	1.43	0	0.27	0.07	0	0.14
376	516	516-24B	81.3	2.62	0	5.57	0.01	2.37	0	0.06	0	0	0.22	0	0.53	0.05	0.02	0
377	516	516-25B	86.39	5.77	0	0.4	0.08	0.26	0.06	0.14	0.02	0.03	1.59	0	0.24	0.06	0	0.15
378	516	516-26B	84.51	5.73	0	1.54	0.12	0.33	0.07	0.15	0	0.07	1.58	0.02	0.22	0.11	0	0.18
380	516	516-28B	84.23	5.75	0.01	0.81	0.09	3.03	0.03	0.17	0	0.08	1.12	0	0.26	0.09	0	0.1
381	516	516-29B	85.89	5.74	0	0.14	0.08	0.23	0.03	0.14	0	0.04	1.42	0.01	0.27	0.06	0	0.12
382	516	516-30B	72.59	0.23	0	14.72	0	0.08	0	0.05	0	0	0.06	0	0.25	0.1	0	0
383	516	516-31B	85.44	4.97	0	0.22	0.04	2.25	0	0.15	0	0.02	0.89	0	0.36	0.04	0	0.08
384	516	516-32B	84.75	4.63	0.01	0.2	0.03	0.37	0	0.21	0.01	0.01	0.63	0	0.42	0.04	0	0.03
385	516	516-33B	86.31	5.75	0.03	0.2	0.09	0.37	0.07	0.18	0.02	0.09	1.58	0	0.25	0.06	0.01	0.15
386	516	516-34B	85.64	5.31	0.04	0.98	0.09	0.1	0.09	0.11	0.02	0.06	1.67	0	0.25	0.08	0	0.15
387	516	516-35B	86.98	5.37	0.01	0.14	0.08	0.4	0.05	0.12	0.01	0.11	1.7	0	0.28	0.05	0	0.19
388	516	516-36B	82.6	6.57	0	0.28	0.07	0.98	0.03	0.2	0	0.09	0.92	0	0.81	0.07	0	0.12
389	516	516-37B	81.94	8.39	0	0.14	0.08	0.54	0.02	0.15	0	0.08	0.91	0.01	0.76	0.07	0	0.14
390	516	516-38B	79.74	7.54	0.02	0.18	0.02	0.79	0.02	0.19	0.02	0.09	0.28	0.01	0.87	0.06	0	0.05
391	516	516-39B	84.58	5.05	0	1.84	0.06	1.31	0.01	0.14	0	0.09	1.26	0	0.5	0.07	0	0.15
392	516	516-40B	85.97	5.63	0	0.58	0.09	0.42	0.02	0.14	0.02	0.02	1.37	0	0.5	0.03	0	0.17
394	516	516-42B	83.29	7.31	0	0.14	0.06	0.49	0.03	0.19	0.01	0.06	0.94	0.02	0.75	0.07	0	0.14
395	516	516-43B	75.3	0.29	0.02	7.15	0.05	11.06	0	0.06	0	0.07	0.44	0.01	0.32	0.03	0.02	0.08
396	516	516-44B	86.16	5.26	0	1.23	0.09	0.13	0.03	0.13	0.01	0.03	1.37	0.01	0.38	0.05	0	0.15
397	516	516-45B	84.88	6.32	0	0.59	0.09	0.07	0.03	0.12	0.02	0.05	1.21	0.02	0.56	0.06	0	0.15
398	516	516-46B	78.96	7.88	0	0.26	0.03	0.44	0	0.13	0.01	0.35	0.67	0.02	1.03	0.09	0	0.14
400	516	516-48B	86.38	6.53	0	0.12	0.07	0.23	0.03	0.12	0	0.04	1.22	0	0.58	0.09	0	0.15
401	516	516-49B	85.66	5.86	0.01	0.26	0.09	0.11	0.04	0.13	0.02	0.04	1.23	0.03	0.57	0.06	0.01	0.15
402	516	516-50B	81.5	8.22	0	1.37	0.08	0.46	0.04	0.27	0.01	0.08	1.09	0	0.42	0.1	0	0.13
403	516	516-51B	85.16	7.19	0	0.21	0.09	0.82	0.05	0.13	0	0.09	1.37	0	0.29	0.07	0	0.14
405	516	516-53B	87.02	5.11	0	0.17	0.08	0.47	0.01	0.16	0	0.06	1.1	0	0.24	0.06	0	0.13
406	516	516-54B	86.79	5.21	0	0.25	0.08	0.59	0.04	0.12	0.03	0.06	1.42	0	0.24	0.06	0	0.13
409	516	516-57B	73.71	8.15	0.02	5.25	0.03	10.83	0	0.08	0	0.03	0.39	0	1.19	0.03	0.01	0.03
410	516	516-58B	87.24	5.28	0	0.18	0.1	0.36	0.07	0.12	0	0.02	1.62	0	0.23	0.05	0	0.18
411	516	516-59B	87.02	5.32	0.01	0.44	0.09	0.35	0.06	0.12	0	0.04	1.57	0	0.26	0.06	0	0.16
412	516	516-60B	86.96	5.42	0	0.31	0.08	0.32	0.04	0.11	0	0.03	1.62	0	0.24	0.06	0	0.14
413	516	516-61B	87.32	5.06	0	0.23	0.08	0.59	0.04	0.11	0	0.04	1.56	0	0.36	0.07	0	0.16
414	516	516-18T	89.89	0.24	0	0.26	0.01	0.15	0	0.07	0	0	0.13	0	0.32	0	0.01	0.05
415	516	516-19T	70.66	0.44	0	7.85	0.17	6.3	0.01	0.48	0	0.21	0.2	0	0.39	0.03	0.02	0.08
417	516	516-21T	73.07	21.79	0	0.18	0	0.93	0	0.05	0	0	0.07	0.02	0.44	0.01	0	0.03
418	516	516-22T	74.09	21.74	0	0.03	0.01	0.05	0.01	0.04	0	0	0.02	0	0.58	0	0	0.02
419	516	516-23T	91.33	0.21	0	0.06	0	0.06	0.01	0.07	0	0	0.13	0.01	0.34	0.01	0.02	0.07
420	516	516-24T	91.69	0.19	0	0.04	0	0.03	0	0.05	0	0	0.06	0.02	0.28	0	0	0.02
422	516	516-26T	72.51	22.71	0	0.01	0	0.05	0	0.03	0	0	0.01	0	0.43	0.02	0	0
424	516	516-28T	91.78	0.16	0	0.03	0	0.06	0.01	0.06	0.01	0	0.06	0	0.27	0.01	0.01	0.02
425	516	516-29T	74.54	22.78	0	0.03	0	0.04	0	0.06	0	0	0.03	0	0.5	0.01	0	0.02
426	516	516-30T	73.46	22.02	0	0.04	0	0.07	0	0.05	0	0	0.03	0.01	0.46	0.01	0	0.01
427	516	516-31T	90.97	0.09	0.01	0.03	0	0.06	0	0.06	0	0	0.06	0	0.28	0	0	0.04
428	516	516-32T	92.2	0.08	0	0.01	0	0.01	0	0.06	0	0	0.03	0.01	0.26	0	0	0.01
429	516	516-33T	92.12	0.23	0	0.09	0	0.57	0	0.08	0	0.01	0.12	0.01	0.32	0.01	0	0.06
430	516	516-34T	90.98	0.12	0	0.05	0	0.93	0	0.05	0	0	0.09	0	0.28	0.01	0.01	0.03
431	516	516-35T	90.44	0.14	0	0.06	0	0.11	0	0.06	0	0	0.09	0	0.29	0.01	0.01	0.04
432	516	516-36T	91.39	0.51	0	0.06	0.01	0.02	0	0.13	0	0.05	0.11	0	0.27	0.09	0.01	0.06
433	516	516-37T	92.29	0.42	0.02	0.1	0.02	0.22	0	0.2	0	0.06	0.13	0	0.45	0.13	0.02	0.06
434	516	516-38T	91.49	0.45	0.03	0.14	0.07	0.15	0	0.32	0	0.14	0.16	0	0.29	0.15	0.02	0.08
435	516	516-39T	88.99	0.38	0.01	0.12	0.15	2.47	0	0.42	0	0.2	0.15	0.01	0.37	0.12	0.02	0.1
436	516	516-40T	88.32	0.43	0	0.1	0	0.06	0	0.24	0	0.03	0.09	0.03	0.3	0.02	0	0.02
437	516	516-41T	98.97	0.13	0	0.03	0	0.02	0	0.06	0	0.01	0.1	0	0.26	0.01	0.01	0.01
438	516	516-42T	85.45	0.15	0.02	0.51	0.02	0.14	0	0.21	0	0.12	0.21	0.01	0.25	0.51	0.02	0.28
439	516	516-43T	75.17	0.56	0	6.11	0.04	2.9	0	0.52	0	0.39	0.18	0	0.29	0.07	0.01	0.11
440	516	516-44T	89.06	0.41	0	0.88	0.04	0.78	0	0.18	0	0.06	0.12	0	0.32	0.08	0.01	0.07
441	516	516-45T	92.85	0.37	0	0.1	0.03	0.84	0	0.18	0.01	0.09	0.12	0.02	0.27	0.03	0.03	0.04
442	516	516-46T	91.97	0.23	0	0.03	0	0.07	0	0.05	0	0.01	0.06	0	0.28	0	0.02	0.03
444	516	516-48T	81.38	0.27	0	5.96	0.04	5.62	0.01	0.07	0	0.08	0.06	0.01	0.25	0.01	0	0.04
446	516	516-50T	90.91	0.21	0	0.06	0	0.51	0	0.06	0	0.01	0.08	0.01	0.28	0.01	0.02	0.04
447	516	516-51T	90.73	0.15	0	0.03	0	0.12	0	0.06	0	0	0.06	0	0.27	0.01	0.01	0
448	516	516-52T	90.06	2	0	0.13	0.11	0.08	0	0.25	0	0.09	0.09	0	0.43	0.03	0.03	0.04
449	516	516-53T	89.75	0.47	0.02	0.12	0.01	0.04	0	0.16	0	0.09	0.12	0	0.29	0.17	0.01	0.04
458	522	522-10	74.52	6.12	0.02	1.64	1.62	0.3	0.04	0.82	0.86	0.03	1.88	1.71	0.26	0.15	0	0.06
459	522	522-11	71.29	0.89	0.01	0.66	0.08	0.06	0	0.06	11.52	0	0.28	0	0.19	1.83	0.01	0.01
463	522	522-16	70.62	12.82	0.01	3.6	2.87	0.23	0	0	0.05	0.04	0.07	0	0.37	0.01	0	0
465	522	522-18	83.53	3.09	0	0.28	0.42	0.03	0	0.21	1.95	0.02	2.63	0.97	0.21	0.19	0	0.14
467	522	522-21	77.28	0.3	0.02	0.54	0.04	0.02	0	0.05	3.67	0	0.11	0	0.21	3.05	0.01	0.01
468	522	522-22	79.82	5.15	0	0.81	0.76	0.08	0	0.33	1.43	0.03	1.92	1.43	0.22	0.2	0	0.13
469	522	522-23	73.85	0.33	0	0.37	0.05	0.07	0	0	0.1	0.04	0.33	0.02	0.19	0.01	0	0.01
470	522	522-25	78.78	0.07	0.04	0.83	0.22	0.81	0	0	0.01	0.06	0.16	0.03	0.15	0.01	0.01	0.02
473	522	522-28	83.33	3.71	0	0.34	0.58	0.02	0.01	0.21	1.77	0.02	2	1.29	0.22	0.19	0	0.11
474	531	531-2	85.03	1.22	0.07	0.22	0.24	0.25	0.04	0.57	0.69	0.02	1.6	1.05	0.22	0.13	0	0.11
476	531	531-5	86.45	1.16	0.07	0.26	0.29	0.34	0.07	0.58	0.91	0.02	1.52	0.55	0.25	0.15	0.05	0.09
477	531	531-6	78.99	1.24	0.05	0.85	0.24	0.74	0.01	0.59	0.71	0.03	0.85	0.18	0.94	0.08	0.01	0.02
480	531	531-10	83.91	0.12	0.05	0.29	0.28	0.34	0	0.73	0.08	0.08	0.47	1.07	1.79	0.04	0.07	0
482	531	531-12	71.61	0.16	0.18	0.55	1.19	1.75	0	1.43	0.22	0.21	1.04	3.58	0.86	0.14	0.03	0.04
485	531	531-15	74.03	0.65	0.26	0.77	0.59	1.14	0.02	1.93	0.44	0.16	1.27	2.07	0.84	0.21	0	0.05
486	531	531-16	73.41	0.13	0.12	0.19	0.67	0.69	0.03	1.03	0.08	0.13	0.79	1.07	1.56	0.05	0.04	0.01
491	531	531-21	85.08	1.59	0.05	0.16	0.16	0.21	0.06	0.56	0.71	0.04	1.23	0.57	0.28	0.11	0	0.1
492	531	531-22	87.66	1.39	0.02	0.31	0.32	0.98	0.09	0.45	0.68	0.05	1.54	0.48	0.32	0.15	0	0.08
493	531	531-23	77.26	0.32	0	0.38	0.06	2.18	0	0.05	8.13	0	0.61	0	0.95	0.45	0	0.04
499	564	564-3	80.48	3.51	0	0.2	0.32	0.33	0.22	0.06	4.58	0.09	1.82	0	0.26	0.46	0.14	0.28
500	564	564-4	83.15	2.1	0	0.19	0.37	0.09	0.13	0.05	2.88	0.1	3.45	0.02	0.21	0.28	0.09	0.43
505	564	564-9	80.45	3.86	0	0.54	0.83	0.37	0.11	0.06	3.27	0.1	2.67	0.01	0.19	0.29	0.1	0.38
507	564	564-11	73.8	4.93	0.01	1.59	1.42	0.2	0	0.06	4.66	0.14	0.45	0	0.19	0.41	0.1	0.24
508	564	564-12	77.11	4.11	0	1.07	0.95	0.28	0.05	0.06	3.44	0.1	1.37	0	0.2	0.46	0.16	0.28
509	564	564-13	70.05	5.62	0	2.52	2.71	0.11	0	0.08	6.03	0.18	0.28	0	0.21	0.53	0.09	0.08
512	564	564-16	74.55	5.31	0	1.2	1.68	0.48	0	0.09	3.9	0.14	0.63	0	0.19	0.43	0.22	0.19
513	564	564-17	76.47	4.98	0	0.57	0.96	0.16	0.11	0.06	3.23	0.11	1.97	0.02	0.2	0.3	0.14	0.35
518	564	564-22	70.4	0.45	0.01	3.68	0.58	0.21	0.01	0.06	8.66	0.03	0.81	0	0.18	1.45	0.1	0.03
519	564	564-23	82.13	3.17	0.03	0.33	0.38	0.06	0.16	0.09	3.31	0.09	2.43	0	0.22	0.42	0.07	0.34
521	564	564-25	78.31	0.63	0	2.54	0.18	0.17	0.03	0.08	0.36	0	0.61	0	0.2	1.52	0.01	0.06
522	564	564-26	79.28	3.71	0.02	0.59	0.96	2.38	0.1	0.08	1.15	0.11	2.54	0.02	0.28	0.35	0.02	0.41
523	564	564-27	78.52	4.53	0	0.55	0.77	0.04	0.11	0.08	2.22	0.13	2.31	0	0.2	0.3	0.07	0.38
524	564	564-28	77.02	6.47	0	0.95	1.08	0.24	0.05	0.08	1.89	0.1	1.31	0.02	0.19	0.33	0.04	0.21
525	564	564-29	78.03	4.43	0	0.67	0.64	0.05	0.06	0.05	2.32	0.16	2.13	0.01	0.19	0.34	0.06	0.42
530	564	564-34	76.83	0.23	0.02	15.73	0	0.07	0	0.04	0.16	0.02	0.13	0	0.19	0.04	0.02	0
531	564	564-35	72.57	0.18	0	12.92	0	0.06	0	0.04	0.05	0.03	0.21	0	0.23	0.03	0.02	0.01
532	564	564-36	73.54	4.63	0	1.79	1.32	0.07	0	0.09	4.75	0.12	0.32	0	0.21	0.47	0.15	0.19
533	564	564-37	79.55	4.2	0.08	0.64	0.89	0.12	0.19	0.1	0.79	0.19	0.91	0.03	0.06	0.1	0	0.06
535	564	564-39	70.23	6	0	1.93	2.03	1.01	0	0.09	4.64	0.16	0.37	0.01	0.31	0.69	0.17	0.1
536	564	564-40	76	0.11	0	13.2	0	0.06	0	0.05	0.07	0	0.19	0.02	0.23	0.02	0.04	0
539	564	564-43	80.88	3.63	0	0.2	0.3	0.14	0.28	0.07	4.55	0.08	1.67	0.02	0.19	0.49	0.11	0.31
540	564	564-44	82.39	2.54	0	0.16	0.3	0.06	0.14	0.07	3.49	0.1	2.71	0	0.19	0.33	0.06	0.39
541	564	564-45	78.97	3.31	0.02	0.48	0.31	0.31	0.14	0.09	4.92	0.07	1.08	0.03	0.25	0.58	0.5	0.19
544	564	564-48	82.36	2.77	0	0.17	0.32	0.07	0.12	0.08	3.14	0.11	2.8	0	0.19	0.33	0.06	0.45
545	564	564-49	83.18	2.29	0	0.23	0.33	0.04	0.13	0.06	3.25	0.1	2.98	0	0.19	0.34	0.04	0.43
547	564	564-51A	82.6	2.68	0	0.46	0.31	0.31	0.18	0.07	3.25	0.11	2.74	0	0.3	0.32	0.08	0.45
548	564	564-52	83.28	3.9	0	0.28	0.38	0.06	0.15	0.07	2.27	0.12	2.22	0	0.22	0.51	0.08	0.35
549	564	564-53	82.33	2.5	0	0.18	0.34	0.07	0.15	0.07	3.19	0.08	2.86	0.02	0.21	0.29	0.04	0.42
550	564	564-54	76.52	3.75	0	0.89	0.54	1.9	0.1	0.06	2.5	0.13	2.38	0	0.17	0.33	0.08	0.38
551	564	564-55	82.69	2.55	0	0.19	0.32	0.03	0.19	0.07	3.95	0.1	2.59	0	0.2	0.34	0.28	0.43
552	564	564-56	81.71	2.84	0.01	0.17	0.29	0.2	0.15	0.07	3.95	0.1	2.43	0	0.19	0.35	0.05	0.39
553	564	564-57	74.13	8.08	0	2.88	1.57	2.05	0.01	0.08	1.31	0.15	0.54	0	0.21	0.64	0.01	0.11
554	564	564-58	80.38	2	0	0.32	0.36	0.05	0.16	0.07	3.33	0.09	3.1	0.02	0.2	0.27	0.04	0.48
555	564	564-59	80.49	3.02	0.01	0.16	0.26	0.07	0.2	0.07	4.48	0.08	2.23	0.01	0.2	0.34	0.06	0.41
556	564	564-60	81.71	2.21	0.01	0.21	0.36	0.04	0.14	0.08	2.92	0.07	2.89	0	0.2	0.3	0.04	0.45
557	564	564-61	79.45	2.33	0	0.24	0.36	0.07	0.15	0.06	4.01	0.12	2.76	0	0.19	0.33	1.49	0.4
558	564	564-62	79.36	4.07	0	0.5	0.48	2.64	0.09	0.06	2.2	0.12	2.51	0.01	0.2	0.4	0.13	0.48
559	564	564-63	80.86	3	0	0.18	0.27	0.05	0.25	0.06	4.23	0.08	2.4	0.01	0.18	0.31	0.05	0.39
560	604	604-1	92.1	0.25	0	0.06	0.02	0.02	0	0.07	0	0	0.09	0	0.25	0	0.02	0.01
565	604	604-6	89.38	0.22	0	0.05	0.02	0.04	0	0.06	0	0	0.02	0	0.22	0	0.01	0
566	604	604-7	90.62	0.27	0	0.08	0.03	0.04	0	0.05	0	0	0.05	0	0.22	0.01	0.01	0
568	604	604-9	85.94	0.32	0	0.12	2.84	0.05	0	0.07	0.04	0	0.04	0.01	0.2	0.05	0.02	0
569	604	604-10	82.94	0.61	0.02	0.11	0	0.44	0	0.04	0.05	0	0.08	0	0.23	0.34	0	0.01
570	604	604-11	87.88	0.64	0	0	0	0.05	0	0.05	0.02	0	0.06	0.03	0.23	0.06	0.01	0
571	604	604-12	83.84	5.48	0	0.2	0.46	0.27	0.13	0.27	0.43	0.05	1.52	0	0.21	0.22	0.01	0.1
572	604	604-13	81.88	5.52	0	0.22	0.57	0.18	0.12	0.31	0.39	0.08	1.51	0	0.24	0.28	0.03	0.09
573	604	604-14	83.01	6.41	0	0.2	0.46	0.13	0.09	0.24	0.39	0.15	1.22	0.02	0.3	0.5	0.01	0.1
574	604	604-15	83.78	5.5	0	0.17	0.5	0.22	0.14	0.26	0.48	0.09	1.51	0	0.24	0.27	0	0.09
575	604	604-17	85.39	0.87	0	0.34	0.02	3.56	0	0.07	0.05	0	0.15	0.01	0.27	0.08	0.03	0
576	604	604-18	81.26	6.07	0	0.29	0.26	0.33	0.07	0.5	0.78	0.07	1.15	0	0.76	2.53	0.01	0.06
577	604	604-19	86	3.57	0	0.09	0.23	0.07	0.05	0.27	0.18	0.02	0.61	0.03	0.24	0.12	0.01	0.07
578	604	604-20	87.61	5.42	0	0.22	0.58	0.09	0.19	0.21	0.52	0.05	1.82	0	0.21	0.26	0	0.11
579	604	604-21	84.93	5.68	0	0.13	0.49	0.22	0.14	0.19	0.58	0.05	1.47	0.01	0.24	0.39	0.07	0.13
581	604	604-23	87.71	5.49	0.02	0.18	0.55	0.28	0.19	0.13	0.53	0.07	1.81	0	0.21	0.24	0	0.1
582	604	604-24	87.73	5.93	0.01	0.15	0.48	0.19	0.13	0.22	0.48	0.11	1.39	0.01	0.25	0.64	0.03	0.11
583	604	604-25	82.18	5.29	0	0.2	0.44	0.24	0.17	0.25	0.55	0.04	1.42	0.02	0.22	0.2	0	0.12
584	604	604-26	87.32	5.35	0	0.27	0.58	0.08	0.21	0.17	0.51	0.05	1.8	0.01	0.2	0.3	0	0.1
586	604	604-28	85.24	8.69	0	0.3	0.04	0.08	0.01	0.08	0.05	0	0.02	0	0.32	0.06	0	0.01
587	604	604-29	87.35	5.86	0.01	0.16	0.46	0.23	0.15	0.23	0.46	0.06	1.31	0	0.28	0.47	0.01	0.1
588	604	604-30	82.45	6.19	0	0.44	0.33	0.06	0.08	0.15	0.32	0.41	1.2	0	0.33	0.61	0.01	0.05
589	604	604-31	89.35	1.48	0.01	0.01	0.03	0.02	0	0.1	0.01	0	0.06	0	0.21	0.06	0	0
590	604	604-32	87.67	4.15	0	0.17	0.43	0.14	0.14	0.16	0.32	0.06	1.25	0	0.22	0.19	0	0.07
591	604	604-33	88.21	5.18	0.02	0.24	0.63	0.06	0.21	0.12	0.6	0.07	1.96	0	0.2	0.3	0	0.12
592	604	604-34	86.59	4.19	0	0.15	0.44	0.16	0.15	0.22	0.36	0.07	1.31	0.01	0.22	0.22	0	0.06
593	604	604-35	87.36	5.4	0	0.32	0.56	0.13	0.16	0.21	0.52	0.05	1.79	0	0.2	0.32	0	0.1
594	604	604-36	87.69	5.37	0	0.24	0.61	0.06	0.22	0.12	0.54	0.04	1.99	0	0.21	0.34	0	0.13
595	604	604-37	86.37	5.25	0.02	0.22	0.6	0.06	0.2	0.19	0.55	0.07	1.87	0	0.2	0.27	0	0.12
596	604	604-38	87.99	5.49	0	0.19	0.55	0.03	0.18	0.15	0.57	0.03	1.78	0.01	0.21	0.26	0.09	0.11
600	623	623-1	76.75	0.95	0.18	0	0.04	0.57	0	0.1	8	0	0.93	0	0.92	1.39	0.11	0
601	623	623-2	73.97	0.09	0	0.01	0.76	0.78	0	0.05	8.22	0.02	0.28	0.06	0.37	1.71	0.01	0.01
603	623	623-4	73.42	0.34	0.06	0.05	0.03	0.57	0	0.07	3.54	0	0.32	0	0.35	1.67	0.04	0
604	623	623-5	78.07	0.86	0	0	0.05	0.96	0.01	0.11	3.88	0	1.06	0	0.45	1.08	0	0
605	623	623-6	75.03	1.15	0.02	0.04	0.27	0.42	0.01	0.31	6.33	0.02	0.35	0	0.36	1.09	0	0.02
606	623	623-7	84.84	0.31	0	0	0.02	1.02	0	0.11	0.25	0	0.26	0.02	0.29	0.75	0	0.01
607	623	623-9	74.62	0.05	0	0	0.04	0.07	0	0.14	0.06	0	2.73	0.09	0.18	0.09	0	0.03
608	623	623-10	72.94	0.73	0	0.02	0.06	0.45	0	0.07	9.95	0	0.34	0	0.39	4.46	0.02	0.03
609	623	623-11	90.64	1.25	0	0	0.03	0.25	0	0.13	0.28	0	0.36	0.03	0.28	0.15	0	0.01
610	623	623-13	80.51	0.11	0	0	0.06	0.24	0	0.06	7.25	0	0.15	0	0.65	1.76	0.01	0.02
611	623	623-14	71.88	0.45	0	0	0.19	0.17	0	0.18	0.07	0.02	2.05	0.05	0.37	0.12	0	0.01
612	623	623-15	78.8	0.02	0	0	0	0.38	0.01	0.06	1.68	0.03	0.08	0	0.44	1.01	0	0
613	623	623-16	79.07	2.14	0.06	0.12	0.86	0.53	0.02	0.81	1.12	0.13	1.01	0.39	0.5	0.3	0	0.07
614	623	623-17	77.25	0.34	0.01	0.07	0.1	1.07	0	0.72	2.68	0.05	0.58	0.16	0.32	2.41	0	0.03
615	623	623-18	83.73	0.42	0.01	0	0.14	2.01	0	0.28	1.38	0.01	0.41	0	0.32	1.81	0	0.03
616	623	623-19	87.67	1.5	0.04	0	0.39	0.09	0.08	0.39	0.24	0.07	1.75	0.62	0.19	0.17	0	0.13
619	623	623-22	84.12	2.16	0.06	0.03	0.35	0.14	0.01	0.45	0.31	0.04	1.27	1	0.25	0.14	0	0.09
622	623	623-27	73.36	0.12	0.08	1.5	0.69	2.7	0	0.67	0.27	0.14	1.16	2.11	0.46	0.21	0	0
623	623	623-29	73.05	0.75	0.01	0	0.03	1.37	0	0.07	10.79	0.02	0.83	0	0.44	5.22	0	0.03
624	623	623-31	88.38	0.1	0	0.35	0.01	0.08	0	0.06	0.02	0	0.1	0.02	1.81	0.04	0	0
625	623	623-32	82.69	1.93	0.01	0.55	0.32	0.11	0.04	0.62	0.15	0.02	1.28	0.88	0.37	0.14	0	0.12
626	623	623-33	79.07	1.94	0.13	0.82	0.29	0.19	0	0.59	0.26	0.04	1.25	1.13	0.43	0.14	0	0.09
627	623	623-34	74.78	1.48	0.08	1.01	0.61	0.22	0.04	0.88	0.23	0.04	1.24	1.05	0.58	0.13	0	0.06
628	623	623-35	83.56	2.08	0	0.62	0.34	0.12	0.01	0.59	0.17	0.04	1.34	0.72	0.32	0.16	0	0.11
630	623	623-37	83.62	1.91	0.04	0.7	0.3	0.14	0.04	0.57	0.15	0.04	1.23	0.64	0.37	0.14	0	0.07
631	623	623-38	83.43	1.83	0.04	0.59	0.36	0.12	0.04	0.61	0.13	0.02	1.27	0.53	0.36	0.13	0	0.1
632	623	623-40	90.78	0.07	0	0.25	0	0.19	0	0.06	0	0	0.04	0.01	0.67	0	0	0
633	623	623-41	81.68	2.13	0.13	0.67	0.32	0.16	0.02	0.72	0.34	0.02	1.31	1.38	0.36	0.13	0	0.1
634	623	623-42	82.94	2.21	0.12	0.59	0.33	0.15	0.04	0.72	0.19	0.04	1.33	1.07	0.32	0.14	0	0.1
635	623	623-43	73.7	1.56	0.04	0.57	0.76	0.23	0	1	0.24	0.05	0.99	1.03	0.39	0.11	0	0.07
636	623	623-44	84.65	2.26	0.22	0.64	0.34	0.17	0.03	0.67	0.19	0.06	1.29	1.12	0.32	0.15	0	0.09
637	626	626-1	77.56	14.11	0	0.4	0.39	0.01	0.39	0.06	0.07	0.17	1.18	0	0.18	0.09	0	0.49
639	626	626-3	75.77	17.09	0	0.24	0.35	0.01	0.38	0.06	0.06	0.16	1.61	0	0.17	0.07	0	0.54
640	626	626-4	76.68	16.11	0	0.25	0.32	0.01	0.37	0.07	0.06	0.18	1.21	0.14	0.18	0.09	0	0.59
641	626	626-5	76.37	15.81	0.02	0.27	0.39	0.02	0.36	0.05	0.06	0.17	1.29	0.07	0.17	0.1	0	0.55
642	626	626-7	77.15	13.87	0.01	0.23	0.53	0.02	0.37	0.06	0.06	0.17	2.02	0.01	0.18	0.09	0	0.58
644	626	626-9	72.34	16.4	0.01	0.38	0.4	0.02	0.27	0.05	0.03	0.16	1.38	0	0.16	0.12	0.01	0.49
645	626	626-10	73.43	16.05	0	0.46	0.46	0.02	0.31	0.05	0.03	0.18	1.53	0	0.17	0.12	0	0.56
646	626	626-11	75.94	15.21	0	0.24	0.36	0.01	0.39	0.06	0.06	0.12	1.33	0.02	0.16	0.07	0	0.57
647	626	626-12	77.21	12.9	0	0.29	0.49	0.01	0.4	0.04	0.09	0.21	1.83	0.03	0.18	0.11	0.11	0.6
648	626	626-13	70.96	20.61	0.01	0.23	0.19	0.03	0.14	0.05	0.02	0.1	0.77	0	0.17	0.11	0	0.29
650	626	626-15	83.38	9.03	0	0.09	0	0	0	0.06	0	0	0.02	0	0.6	0.02	0	0.01
652	626	626-17	78.44	13.18	0.02	0.26	0.45	0.01	0.41	0.07	0.06	0.15	1.96	0.01	0.17	0.07	0	0.49
654	626	626-19	76.54	13.56	0	0.28	0.53	0.01	0.36	0.07	0.05	0.19	1.82	0.01	0.18	0.1	0	0.6
655	626	626-20	78.77	12.06	0	0.23	0.53	0.01	0.36	0.06	0.06	0.19	1.91	0	0.18	0.11	0	0.64
658	626	626-23	80.51	11.01	0.02	0.27	0.43	0.02	0.37	0.04	0.05	0.15	1.94	0	0.18	0.09	0.04	0.62
659	626	626-24	77.59	14.2	0	0.23	0.38	0.01	0.38	0.06	0.05	0.14	1.6	0.13	0.18	0.06	0	0.54
660	626	626-25	71.08	20.07	0	0.29	0.19	0.01	0.17	0.06	0.04	0.17	0.88	0.03	0.17	0.11	0	0.34
661	662	662-1	76.36	0	0	12.58	0	0.04	0	0.06	0	0.03	9.01	0	0.23	0.03	0	0.01
662	662	662-2	74.17	0.08	0.07	15.07	0.02	0.03	0	0.05	0	0.01	10.79	0	0.16	0.05	0.01	0
663	662	662-3	70.97	0.02	0.01	12.77	0.01	0.01	0.01	0.04	0	0.38	10.75	0	0.16	0.37	0	0
665	662	662-5	84.35	5.6	0.02	3.87	0.02	0.04	0	0.07	0.02	0.01	3.65	0.01	0.2	0.23	0	0.01
666	662	662-6	83.81	9.79	0.02	0.05	0	0.03	0	0.05	0.01	0	0.33	0.01	0.42	0.01	0	0.01
667	662	662-7	89.01	7.07	0	0.12	0	0.03	0.02	0.07	0.01	0	1.29	0	0.18	0.03	0	0.03
668	662	662-8	88.39	7.04	0.02	0.18	0.01	0.02	0.01	0.07	0	0	1.79	0	0.2	0.06	0.1	0.03
669	662	662-9	89.34	7.09	0	0.11	0.01	0.01	0	0.07	0	0	1.11	0.01	0.19	0.01	0	0.03
670	662	662-10	73.79	0.05	0	14.96	0	0.02	0	0.06	0	0.32	11.05	0	0.27	0.23	0	0.02
671	662	662-11	74.12	0.02	0	12.37	0	0.02	0	0.06	0.01	0.01	10.97	0	0.23	0.05	0	0
672	662	662-12	73.23	0.03	0	13.5	0.01	0.03	0.03	0.05	0	0.06	12.02	0.02	0.18	0.03	0.01	0
673	662	662-13	74.48	0.07	0	15.67	0	0.03	0	0.05	0.01	0.02	11.13	0.01	0.25	0.3	0.01	0
675	662	662-15	79.23	14.26	0.02	0.04	0.01	0.01	0	0.05	0	0	0.28	0.03	0.23	0.02	0	0.01
676	662	662-16	88.79	7.39	0	0.11	0.01	0.02	0.02	0.06	0	0	0.73	0.05	0.18	0.03	0	0.02
677	662	662-17	88.94	7.38	0	0.11	0.01	0.01	0.01	0.06	0	0	1.14	0.01	0.18	0.02	0	0.01
678	662	662-18	88.03	7.32	0	0.13	0.01	0.02	0.02	0.07	0	0	1.32	0	0.18	0.03	0.07	0.03
679	662	662-19	70.09	0	0.02	14.31	0.04	1.3	0.04	0.03	0	0.09	10.89	0	0.25	0.03	0.02	0
680	662	662-20	72.04	0.02	0	13.78	0	0.01	0	0.05	0	0.44	12.14	0	0.16	0.41	0.01	0.02
681	662	662-21	74.58	0.03	0.01	14.53	0.02	0.06	0	0.06	0.02	0.14	11.76	0	0.19	0.32	0.01	0
682	662	662-22	71.76	0.02	0	14.5	0	0.07	0	0.04	0	0.11	8.48	0.01	0.18	0.16	0	0
683	662	662-23	79.75	6.84	0	5.41	0	0.09	0	0.05	0	0	3.71	0.01	0.24	0.09	0	0.01
684	662	662-24	86.61	8.14	0	0.19	0.01	0.02	0.04	0.05	0.02	0	1.85	0	0.19	0.05	0.43	0.01
685	662	662-25	88.73	7.33	0.01	0.11	0	0.02	0	0.06	0	0	1.1	0	0.18	0.03	0	0.03
686	662	662-26	87.3	7.67	0	0.18	0.01	0.02	0.03	0.06	0	0	1.76	0	0.19	0.03	0.3	0.03
690	662	662-30	73.39	0.02	0.02	15.06	0	0.04	0.02	0.06	0.02	0.29	11.61	0	0.18	0.43	0	0
691	662	662-31	71.45	0.03	0	14.65	0.03	0.4	0.01	0.06	0	0.04	11.77	0.02	0.23	0.07	0	0
692	662	662-32	73.99	0.02	0	14.78	0	0.03	0	0.04	0	0.08	11.39	0	0.2	0.32	0.01	0
693	662	662-33	73.7	0.25	0.01	14.54	0	0.15	0	0.05	0.01	0.56	11.72	0	0.25	0.58	0	0
695	662	662-35	75.15	3.99	0.02	8.09	0	0.02	0.01	0.04	0.01	0	7.06	0.03	0.28	0.02	0	0
696	662	662-36	74.68	10.44	0.01	6.7	0	0.01	0	0.05	0.01	0	5.82	0.01	0.26	0.03	0	0
697	662	662-37	78.73	3.21	0.03	8.99	0.01	0.04	0.02	0.07	0	0	7.89	0.04	0.21	0.01	0	0
698	662	662-38	73.34	0.06	0	15.21	0.7	0.45	0.01	0.06	0.03	0.32	11.54	0	0.19	0.38	0	0.02
699	662	662-39	72.75	0.03	0	14.16	0.04	0.1	0	0.06	0	0.1	11.86	0	0.24	0.25	0	0
702	809	809-3	73.17	6	0.64	0.36	0.71	0.21	0	1.33	0.24	0.09	0.93	0.88	0.73	0.19	0.12	0.04
703	809	809-4	73.97	10.98	0.01	0.69	0.08	0.81	0	0.07	2.28	0	0.41	0	0.36	0.35	0	0
704	809	809-5	88.27	0.05	0.04	6.26	0.07	0.55	0	0.06	0.07	0	2.79	0	0.27	0.09	0.01	0.03
710	809	809-12	76.11	0.69	0.15	1.06	1.27	0.29	0	1.47	0.25	0.18	1.36	1.13	0.63	0.28	0.05	0.05
711	809	809-13	80.15	1.26	0.08	0.73	0.55	0.54	0.03	0.53	0.22	0.05	1.62	0.5	0.3	0.14	0.05	0.14
712	809	809-14	70.88	2.24	0.02	0.18	1.08	0.1	0.12	2.56	0.13	0.16	1.47	0.28	0.8	0.08	0	0.12
713	809	809-15	87.72	2.13	0.05	0.36	0.42	0.23	0.07	0.53	0.12	0.05	1.53	0.5	0.31	0.14	0	0.11
714	809	809-16	76.14	2.38	0.19	0.15	0.24	0.49	0.01	0.62	0.24	0.07	0.95	0.24	0.33	0.15	0.04	0.05
715	809	809-17	82.88	3.02	0.29	0.64	0.36	0.24	0	0.68	0.26	0.05	1.06	0.76	0.28	0.17	0.07	0.05
719	809	809-21	87.92	1.6	0.25	0.28	0.37	0.13	0.06	0.69	0.19	0.08	1.26	0.3	0.27	0.19	0.03	0.05
720	809	809-22	83.38	3.37	0.16	0.39	0.45	0.08	0.06	0.83	0.21	0.06	1.33	0.67	0.29	0.16	0.01	0.12
721	809	809-23	77.48	1.76	0.18	0.22	0.06	6.89	0	0.79	1.22	0.08	0.77	0.54	0.66	0.33	0.06	0.07
722	809	809-24	89.61	1.58	0.12	0.3	0.34	0.17	0.05	0.43	0.12	0.02	1.18	0.5	0.23	0.12	0.01	0.12
724	809	809-26	87.33	2.27	0.04	0.42	0.32	0.35	0.05	0.57	0.24	0.05	1.83	0.4	0.3	0.14	0.01	0.13
725	809	809-27	88.63	1.77	0.07	0.04	0.25	0.05	0.03	0.7	0.25	0.09	1.03	0.28	0.26	0.23	0.01	0.07
726	809	809-28	78.75	4.1	0.22	0.23	0.38	0.5	0.05	0.94	1.12	0.09	1.02	0.22	0.4	0.31	0	0.04
727	809	809-29	83.48	0.08	0.5	1.55	0.01	0.21	0	0.46	0.08	0.02	0.06	0.99	0.29	0.08	0	0.08
729	809	809-31	86.91	2.15	0.07	0.44	0.44	0.18	0.04	0.62	0.15	0.07	1.78	0.43	0.25	0.14	0.01	0.12
731	809	809-33	76.05	5.07	0	9.37	0.8	4.6	0	0.07	0.08	0.03	0.44	0	1.55	0.02	0.01	0.01
732	809	809-34	81.84	3.67	0.28	0.43	0.43	0.37	0.05	0.9	0.24	0.06	1.23	0.75	0.27	0.15	0.02	0.07
733	809	809-35	86.72	2.13	0.04	0.39	0.35	0.31	0.04	0.63	0.11	0.06	1.77	0.31	0.28	0.09	0	0.09
734	809	809-36	86.81	2.28	0.06	0.36	0.31	0.16	0.05	0.59	0.11	0.04	1.62	0.4	0.3	0.13	0.03	0.11
736	809	809-39	81.54	3.22	0.24	0.67	0.42	0.18	0.06	0.85	0.22	0.04	1.14	1	0.33	0.13	0	0.07
737	809	809-39A	79.23	1.43	0.15	0.8	0.42	0.58	0	1.76	0.35	0.11	1.05	1.13	0.67	0.18	0.03	0.06
738	809	809-40	79.65	3.45	0.17	0.49	0.36	0.16	0.03	1	0.4	0.05	1.28	1.1	0.34	0.14	0.02	0.07
739	809	809-41	80.31	1.32	0.06	0.5	0.26	2.23	0	0.78	1.31	0.05	1.26	0.26	0.25	0.75	0	0.06
740	809	809-42	84.88	2.54	0.11	0.57	0.5	0.13	0.06	0.58	0.17	0.05	1.37	0.6	0.31	0.14	0.01	0.09
741	809	809-43	86.39	1.96	0.09	0.43	0.39	0.16	0.08	0.62	0.13	0.04	1.88	0.4	0.27	0.11	0.01	0.12
742	809	809-44	78.74	2.29	0.37	0.35	0.23	0.22	0	0.75	0.23	0.06	0.88	0.26	0.42	0.16	0.03	0.05
743	809	809-45	72.3	9.06	0.01	0.21	0.13	0.15	0	0.26	3.03	0.04	0.7	0.03	0.6	0.33	0	0.03
746	809	809-48	70.8	1.2	0.26	0.53	1.62	0.77	0	2.11	0.83	0.17	1.35	2.59	0.86	0.57	0.02	0.02
748	809	809-50	83.49	1.37	0.29	0.23	0.59	0.22	0.08	0.95	0.22	0.15	1.99	0.25	0.28	0.39	0.03	0.05
749	809	809-51	82.73	1.25	0.08	0.27	0.53	0.08	0.09	0.68	0.23	0.11	1.74	0.15	0.25	0.21	0.01	0.07
750	809	809-52	82.25	2.69	0.16	0.46	0.42	0.17	0.05	1.03	0.32	0.07	1.35	1.1	0.29	0.16	0.05	0.06
751	809	809-53	82.07	2.39	0.2	0.48	0.36	0.25	0	1.01	0.39	0.06	1.34	1.09	0.34	0.18	0.07	0.07
752	809	809-54	83.1	2.12	0.21	0.43	0.37	0.21	0.06	0.97	0.34	0.07	1.36	0.84	0.32	0.15	0.05	0.08
753	809	809-55	86.12	2.19	0	0.09	0.04	0.79	0	0.35	0.86	0.02	0.3	0.01	0.4	0.33	0	0
754	809	809-56	82.65	2.58	0.15	0.35	0.4	0.43	0.02	0.96	0.34	0.07	1.24	0.76	0.31	0.13	0.04	0.08
755	809	809-57	84.4	1.95	0.21	0.4	0.4	0.11	0.05	0.8	0.22	0.04	1.51	0.43	0.27	0.14	0.03	0.08
756	809	809-58	84.65	1.72	0.17	0.45	0.5	0.18	0.05	0.84	0.27	0.05	1.31	0.42	0.36	0.14	0.06	0.08
757	809	809-59	73.27	0.41	0	1.6	0.06	4.03	0	0.14	4.37	0	0.61	0.02	0.48	0.68	0.03	0.02
759	809	809-61	86.97	0.86	0	0.26	0	1.37	0	0.06	1.57	0	0.35	0	0.31	0.35	0.02	0.02
760	809	809-62	78.78	3.54	0.04	3.96	0.04	1.33	0	0.14	0.38	0	0.36	0.02	1.7	0.03	0.07	0.02
761	809	809-63	82.55	0.45	0.02	7.91	0	3.24	0	0.08	0.28	0	0.25	0	0.38	0.22	0	0.02
762	1232	1232-4	85.95	0.69	0	0.48	0.08	0.3	0.79	0.06	0.07	0.87	5.16	0.01	0.19	0.17	0.01	0
763	1232	1232-6	87	0.84	0	0.51	0.13	0.33	0.81	0.06	0.07	0.92	4.69	0.01	0.2	0.19	0.01	0
764	1232	1232-7	86.37	1.25	0	0.58	0.22	0.29	0.82	0.05	0.08	0.94	4.48	0	0.19	0.25	0.03	0.01
765	1232	1232-8	86.12	1.16	0.01	0.37	0.17	0.14	0.68	0.05	0.1	1.08	4.94	0	0.2	0.29	0	0.02
766	1232	1232-10	82.87	1.96	0	1.09	1.84	0.36	0.91	0.05	0.07	0.71	4.13	0	0.19	0.46	1.39	0
769	1232	1232-25	86.22	0.9	0	0.41	0.14	0.25	0.83	0.07	0.04	0.87	5.49	0.02	0.19	0.22	0.02	0
772	1232	1232-31	84.08	0.65	0	0.35	0.08	0.26	0.88	0.07	0.02	0.88	8.86	0.01	0.22	0.17	0.02	0.03
773	1232	1232-37	85.93	1.15	0	0.44	0.19	0.25	0.8	0.09	0.05	0.85	4.48	0	0.2	0.17	0	0
775	1232	1232-39	85.19	0.4	0.01	0.48	0.04	0.44	1.1	0.07	0.02	0.82	5.01	0	0.22	0.13	0.01	0
776	1232	1232-40	85.02	0.28	0	0.75	0.11	0.43	1.13	0.06	0.03	0.81	4.84	0	0.2	0.13	0.1	0.01
777	1232	1232-42	86.5	1.19	0	0.42	0.22	0.24	0.91	0.06	0.07	0.96	4.58	0	0.2	0.22	0	0.01
779	1232	1232-44	83.82	0.6	0.01	0.44	0.05	0.27	0.97	0.06	0.05	0.82	4.88	0	0.21	0.14	0	0
781	1232	1232-46	86.46	0.67	0.01	0.39	0.1	0.3	0.98	0.07	0.04	0.93	4.82	0.03	0.21	0.15	0.04	0
782	1232	1232-47	86.16	0.9	0	0.45	0.17	0.26	0.88	0.06	0.05	0.85	4.44	0	0.19	0.15	0.01	0
783	1232	1232-48	87.01	0.74	0	0.44	0.08	0.27	0.94	0.06	0.04	0.86	4.74	0.04	0.19	0.15	0	0
785	1232	1232-50	84.59	0.25	0	1.41	0	0.68	1.13	0.05	0.02	0.74	4.56	0.01	0.22	0.15	0.03	0.01
787	1232	1232-52	77.18	2.08	0.02	2.52	0.26	0.22	0.75	0.02	0.15	0.4	28.24	0	0.21	0.33	16.23	0
788	1232	1232-53	87.15	0.88	0	0.46	0.1	0.24	0.93	0.06	0.03	0.9	4.5	0	0.2	0.13	0.02	0
789	1232	1232-58	86.31	1.23	0	0.45	0.22	0.26	0.87	0.04	0.05	0.87	4.4	0	0.19	0.16	0.01	0
793	1237	1237-2	78.42	3.92	0	0.49	0.82	0.37	0.01	0.2	0.02	0.74	1.44	0.02	0.41	0.39	0.69	0
797	1237	1237-6	91.27	0.43	0.01	0.54	0.74	0.16	0.02	0.11	0.06	0.86	1.6	0	0.24	0.34	0.03	0.03
798	1237	1237-7	88.13	0.62	0.03	0.92	0.96	0.39	0.05	0.11	0.05	0.91	1.45	0	0.27	0.3	0.04	0.01
799	1237	1237-8	86.97	0.75	0	1.27	0.92	1.47	0.03	0.1	0.04	0.94	1.38	0.04	0.33	0.33	0.05	0.01
800	1237	1237-9	79.46	1.15	0.01	1.05	1.12	1.16	0.04	0.09	0.06	0.86	1.64	0.03	0.26	0.29	0.1	0.01
801	1237	1237-10	90.39	0.67	0	1.02	0.95	0.37	0.07	0.14	0.07	1.01	1.45	0	0.27	0.49	0.04	0.01
802	1237	1237-11	87.02	0.9	0	1.41	1.16	0.59	0.04	0.16	0.07	1.01	1.34	0.04	0.31	0.31	0.07	0
805	1237	1237-14	88.72	0.81	0.02	0.78	1.04	0.37	0	0.1	0.05	0.96	1.75	0	0.28	0.31	0.03	0.03
806	1237	1237-15	89.71	0.56	0.03	0.89	0.87	0.18	0.07	0.1	0.02	0.95	1.72	0.01	0.24	0.32	0.03	0.03
807	1237	1237-17	92.51	0.2	0	0.61	0.81	0.09	0.05	0.07	0.06	0.89	1.81	0.01	0.23	0.37	0.01	0
808	1237	1237-24	93.04	0.16	0	0.43	0.31	0.01	0.05	0.11	0.1	1.1	2.01	0.02	0.22	0.37	0	0.02
809	1237	1237-25	91.43	0.18	0.03	0.45	0.6	0.02	0.03	0.1	0.11	1.12	1.87	0.01	0.23	0.38	0.01	0.03
810	1237	1237-26	91.34	0.85	0	0.47	0.34	0.05	0.03	0.08	0.09	1.15	2.07	0.04	0.22	0.39	0.04	0.02
811	1237	1237-27	84.93	1	0	0.6	0.89	0.44	0.05	0.08	0.04	1.07	1.95	0.06	0.26	0.42	0.05	0.01
813	1237	1237-29	91.44	0.73	0.03	0.67	0.22	0.11	0.04	0.15	0.08	1.08	1.94	0	0.23	0.36	0.05	0.02
817	1237	1237-36	83.74	1.92	0	1.35	1.22	0.69	0.03	0.16	0.01	0.82	1.55	0.03	0.31	0.28	0.03	0.02
818	1237	1237-37	77.56	2.75	0	5.06	1.64	2.99	0.09	0.17	0	0.87	1.31	0.02	0.69	0.25	0.06	0.01
819	1237	1237-38	83.7	2.25	0.02	1.78	0.64	0.14	0.07	0.1	0.1	0.82	1.51	0	0.27	0.46	0.04	0
820	1237	1237-39	91.85	0.16	0	0.77	0.77	0.22	0.05	0.12	0.09	0.86	1.88	0.02	0.25	0.36	0.01	0
821	1237	1237-40	92.46	0.31	0	0.58	0.65	0.22	0.04	0.1	0.11	0.88	1.83	0.01	0.25	0.39	0.01	0
822	1237	1237-41	87.74	0.8	0	1.42	1	0.7	0.02	0.08	0.06	0.88	1.63	0.05	0.35	0.28	0.02	0.01
823	1237	1237-42	86.07	1.63	0	1.66	1.07	0.81	0.07	0.09	0.06	0.8	1.45	0.05	0.35	0.28	0.05	0
824	1237	1237-43	88.98	1.41	0	1.02	0.85	0.45	0.04	0.1	0.07	0.78	1.62	0.01	0.28	0.31	0.05	0
825	1237	1237-44	89.57	0.7	0	1.05	0.9	0.47	0.06	0.09	0.05	0.85	1.67	0	0.27	0.31	0.04	0
826	1237	1237-45	89.69	0.73	0.01	1.35	0.79	0.65	0.02	0.08	0.06	0.88	1.66	0.01	0.33	0.37	0.04	0
827	1237	1237-46	86.77	0.59	0	1.1	0.98	0.43	0.05	0.13	0.06	0.89	1.73	0.02	0.27	0.27	0.02	0.03
830	1237	1237-54	84.99	0.44	0.01	0.08	1.03	0.04	0	0.07	0	0.08	0.34	0.02	0.24	0.03	0.16	0
842	1262	1262-11	74.8	0.14	0	8.43	0.66	0.48	0.06	0.1	0.01	1.27	3.14	0	0.52	0.86	0.36	0.24
843	1262	1262-12	73.48	0.09	0	18.4	0.81	0.37	0.07	0.1	0	1.33	3.49	0	0.39	0.89	0.36	0.24
852	1262	1262-21	80.43	0.1	0.02	7.51	0.83	0.57	0.08	0.1	0	0.93	3.66	0.01	0.25	1.35	0.25	0.45
877	1262	1262-44	73.16	3.9	0.01	7.7	1.74	1.79	0.16	0.64	0	1.72	2.64	0.12	0.68	0.26	0.02	0.02
887	1303	1303-4	70.95	3.63	0	4.8	0.29	0.91	0.18	0.07	0	0.11	4.04	1.08	0.3	0.55	0.25	0.46
889	1303	1303-7	85.16	1.26	0.04	0.42	0.56	0.09	0.43	0.06	0.06	0.59	5.13	0.01	0.2	0.22	0	0.04
890	1303	1303-8	85.16	1.99	0.02	0.14	0.5	0.07	0.27	0.06	0.07	0.91	5.25	0.03	0.21	0.18	0	0.05
891	1303	1303-9	84.88	1.59	0	0.38	0.52	0.14	0.34	0.09	0.07	0.65	4.76	0.05	0.19	0.2	0	0.05
894	1303	1303-15	87.8	1.76	0	0.15	0.5	0.06	0.28	0.06	0.08	0.96	4.96	0.03	0.23	0.24	0.01	0.02
895	1303	1303-16	83.47	2.29	0	0.27	0.54	0.12	0.3	0.1	0.08	0.73	5.39	0.06	0.27	0.21	0.12	0.04
896	1303	1303-17	85.12	1.22	0	0.35	0.53	0.1	0.48	0.05	0.07	0.73	4.29	0	0.2	0.24	0	0.02
897	1303	1303-19	86.21	1.8	0	0.31	0.41	0.09	0.33	0.06	0.08	0.68	5.02	0	0.19	0.24	0	0.06
898	1303	1303-20	85.56	1.94	0	0.27	0.45	0.09	0.27	0.08	0.08	0.57	5.25	0	0.19	0.2	0	0.03
899	1303	1303-21	85.69	2.14	0	0.29	0.38	0.09	0.26	0.07	0.08	0.64	5.47	0	0.19	0.21	0	0.06
900	1303	1303-22	70.75	0.11	0	6.69	0.31	0.57	0.11	0.11	0	0.15	2.01	1.67	0.32	0.59	0.02	0.38
901	1303	1303-23	82.01	1.13	0	2.53	0.49	0.27	0.44	0.13	0	0.23	3.16	0.07	0.2	0.24	0.11	0.02
902	1303	1303-24	84.97	1.9	0.02	0.36	0.45	0.14	0.6	0.11	0.02	0.43	4.97	0.07	0.2	0.15	0	0
903	1303	1303-25	83.38	0.43	0.01	1.16	0.75	0.27	0.55	0.32	0.01	0.48	3.06	0.22	0.23	0.11	0	0.01
904	1303	1303-31	77.76	0.08	0	1.4	0.49	0.1	0.31	0.08	0.04	0.65	4.51	0	0.19	0.2	0	0.02
905	1303	1303-32	75.2	1.56	0	0.39	0.54	0.15	0.32	0.08	0.05	0.61	11.09	0.08	0.2	0.14	0	0.01
906	1303	1303-33	83.71	1.49	0.01	0.31	0.53	0.11	0.33	0.07	0.05	0.69	5.04	0.01	0.2	0.2	0.01	0.03
907	1303	1303-37	83.1	1.23	0	0.63	0.62	0.18	0.36	0.14	0.03	0.71	4.62	0.13	0.2	0.17	0.02	0.04

## Sheet: S2 Minor - LA-ICP-MS
Table S2 Minor and trace element concentrations (ppm). Spot analysis with UO2 > 80 wt % (Pristine) do not have a fill color. Spot analysis with UO2 70 - 80 wt% (Altered) are yellow. NA = not analyzed.
No	Sample	Spot	Ca	Sc	Ti	Cr	Mn	Co	Ni	Ga	As	Rb	Sr	Y	Zr	Nb	Mo	Cs	Ba	La	Ce	Pr	Nd	Sm	Eu	Tb	Gd	Dy	Ho	Er	Tm	Yb	Lu	Hf	Ta	W	Pb	Th
2	333	333-2	6117.84	0.24	22.86	0.55	34.78	0.1	4.57	13.01	NA	1.98	241.67	5023.96	84.35	101.15	1.1	0.57	89.75	23.65	319.21	74.27	618.79	1094.9	52.23	409.66	1454.89	1904.87	219.22	336.97	44.57	251.4	15.65	1.41	0.84	0.77	2806.3	12888.1
7	333	333-9	22019.9	0.64	6.14	1.92	320.63	1.25	30.89	1.83	NA	14.44	135	41196.6	194.68	82.32	0.92	6.37	1.56	129.6	2144.59	495.98	3878.31	7285.99	244.8	3081.72	10616.5	14200.9	1444.57	1992.29	249.29	1410.82	76.31	2.83	0.85	2.81	3163.36	53213.4
8	333	333-10	8969.5	0.33	7.62	0.29	66.67	0.19	1.82	2.59	NA	3.99	489.57	4734.25	169.65	106.01	0.26	2.25	16.13	32.79	456.48	102.77	855.98	1654.46	50.03	539.15	2088.28	2107.85	180.04	204.98	22.95	109.65	6	2.18	1.26	1.39	527.53	12712.8
9	333	333-11	11849.7	0.26	2.33	0.31	75.87	0.21	6.05	0.44	NA	3.78	231.16	5793.83	172.54	39.01	0.18	2	0.71	36.55	613.69	134.83	1111.92	2133.05	62.16	677.46	2662.7	2621.87	220.84	248.69	26.46	126.24	6.41	2.4	0.28	1.03	689.71	15536.1
10	333	333-12	10949.2	0.28	3.29	0.2	51.59	0.2	0.79	2.87	NA	2.74	727.19	4481.71	178.92	59.81	0.11	1.37	19.03	27.68	484.4	105.84	862.85	1651.26	48.57	519.03	2048.54	2024.03	170.25	191.05	20.65	101.01	5.01	2.53	0.46	0.96	685.65	11906.4
12	333	333-14	7061.24	0.78	21.45	0.62	114.89	0.22	1.37	5.15	NA	2.66	517.04	5940.47	502.94	216.59	0.23	1.02	38.05	41.78	517.62	133.32	1115.61	2146.99	64.12	681.94	2608.26	2655.73	229.11	266.17	28.38	140.63	7.99	13.79	15.93	1.21	1573.16	17406.3
14	333	333-16	9862.87	0.25	2.06	0.29	42.64	0.05	5.76	0.98	NA	3.23	597.28	4356.25	147.52	77.21	0.22	1.9	5.7	31.19	421.99	98.94	832.16	1598.43	48.28	513.55	1998.17	1995.59	169.87	189.64	20.64	99.72	5.19	1.99	0.73	1.02	545	12668.7
15	333	333-17	5417.43	0.26	6.69	0.26	47.39	0.17	0.07	4.85	NA	2.08	473.45	7201.5	31.37	103.4	0.15	0.6	37.57	23.82	295.34	65.01	526.92	1040.43	41.39	458.36	1556.45	2182.29	238.4	370.04	52.12	314.92	19.68	0.43	2.34	0.92	1051.24	8493.37
16	333	333-18	6110.69	0.33	9.08	0.38	96.4	0.27	0.11	1.24	NA	4.55	331.11	12457.4	61	83.19	0.27	1.34	3.24	52.58	750.64	186	1568.01	2801.85	157.25	1047.02	3927.87	4514.59	468.25	641.08	73.88	384.82	22.37	0.89	1.09	1.81	2993.19	16962.4
18	333	333-20	8562.12	0.62	1.38	0.46	66.35	0.21	0.12	0.46	NA	15.22	78.48	7234.54	193.22	145.1	0.49	15.45	0.55	51.86	677.4	163.56	1354.04	2630.47	82.41	827.18	3224.35	3255.02	281	331.97	36.43	183.58	10.18	2.64	0.73	4.27	788.98	18682
19	333	333-21	13629.4	0.62	5.74	0.58	111.72	0.33	0.16	0.66	NA	5.75	240.38	14174.6	118.07	105.56	0.38	2.79	0.88	52.04	682.14	158.95	1335.94	2648.56	91.45	978.3	3590.55	4250.55	443.46	664.05	88.12	540.93	34.91	1.62	2.14	3.73	753.68	18213.6
20	333	333-23	9541.26	0.45	1.73	0.32	9.67	0	1.71	8.23	NA	8.15	54.75	3148.55	221.05	10.24	0.65	1.78	63.9	94.2	657.3	79.27	596.79	2346.58	53.56	978.92	3829.09	2752.83	156.22	135.87	11.29	44.93	3.14	9.14	1.66	0.84	1599.7	25763.6
24	333	333-28	2401.4	0.38	1.48	1.43	55.89	0.01	0.22	1.56	NA	99.54	34.41	6307.82	224.73	9.3	0.05	10.73	8.94	67.11	1055.33	262.75	2506.41	8084.15	127	2524.38	12471.9	6190.72	316.82	198.12	12.14	45.2	3.11	8.19	0.77	0.19	1695.75	43430.9
25	333	333-29	957.7	0.22	1.11	0.66	35.6	0.01	0.15	0.46	NA	73.88	3.33	5699.37	132.24	6.02	0.06	3.24	1.19	47.53	790.65	195.67	1872.72	6242.18	107.39	2106.74	10087.9	5264.25	274.98	171.13	10.9	39.53	2.64	3.51	0.64	0.13	1474.72	32737.2
26	333	333-33	743.29	0.01	0.1	0.04	4.85	0.01	0.01	2.22	NA	6.06	27.82	469.53	8.57	1.36	0.01	0.89	17.39	9.28	94.22	20.38	183.54	581.3	10.52	183.77	880.18	443.32	22.33	13.98	0.83	3.24	0.21	0.19	0.14	0.03	128.32	2992.43
29	333	333-36	18532.2	0.64	1.97	0.69	93.86	0.01	0.26	31.1	NA	125.92	567.38	12246.6	378.36	4.45	0.07	21.93	240.93	106.31	1578.61	396.25	3839.22	12585.4	225.07	4396.69	20678.2	11022.3	575.09	376.26	23.49	85.12	5.8	14.17	0.91	0.76	3433.97	63673.3
30	333	333-37	9748.52	0.56	0.86	1.1	49.63	0.02	0.6	19.65	NA	11.07	108.37	398.33	1.73	0.8	0.05	21.18	30.93	12.92	632.81	12.54	85.5	264.91	5.8	92.64	387.55	260	15.72	15.23	1.42	6.48	0.55	0.01	0.01	0.27	614.23	39.83
32	333	333-42	12750.3	0.25	1.22	0.98	58.09	0.01	0.3	13.64	NA	167.09	163.19	7540.18	164.86	4.68	0.05	30.76	106.11	84.22	1297.03	316.03	3011.16	9795.95	164.75	3100.07	15225.2	7471.37	363.57	231.78	12.39	45.87	3.23	3.8	0.83	0.45	1651.73	54788
33	333	333-43	1529.46	0.38	2.52	0.25	53.17	0.13	0.11	1.59	NA	45.06	16.19	4176.73	212.99	5.83	0.05	2.02	8.92	83.16	775.97	189.54	1702.17	5214.9	92.34	1611.4	7771.45	3955.57	208.52	136.53	8.84	33.56	2.13	8.6	0.98	0.34	1078.66	22416.5
34	333	333-44	1093.49	0.13	0.48	0.23	28.56	0	0.12	0.75	NA	49.68	18.3	3411.02	79.91	2.65	0.05	4.23	4.06	33.94	521.74	124.45	1204.72	3928.76	68.04	1301.11	6235.95	3208.22	166.75	106.46	6.5	23.15	1.54	1.95	0.41	0.19	779.97	21121.6
35	333	333-45	1836.78	0.84	2.36	0.76	95.53	0.01	0.31	3.31	NA	93.95	4.4	11149.9	497.64	3.81	0.06	2.16	20.01	116.38	1828.88	482.69	4509.04	13843.1	237.74	4291.46	20807.7	10575.4	551.67	360.48	23.22	85.93	5.55	19.59	0.74	0.13	2843.64	64612.5
37	333	333-47	8011.8	0.34	1.1	0.22	48.14	0.18	0.09	9.79	NA	41	222.49	3241.79	187.24	2.63	0.04	11.41	76.36	58.16	712.24	176.23	1546.18	4499.09	79.48	1305.71	6268.82	3159.76	165.11	108.38	7.01	27.39	1.72	7.71	0.49	0.38	1073.17	20162
38	333	333-48	1107.79	0.11	0.66	0.17	14.81	0	0.07	0.16	NA	23.68	0.23	1989.47	64.33	2.13	0.01	1.62	0.28	20.33	312.13	78.59	744.15	2338.29	38.61	765.6	3706.57	1876.47	97.97	62.83	3.79	13.54	0.92	1.95	0.34	0.04	529.95	13242.7
48	334	334-2	30607.9	0.7	14.31	0.91	241.99	0.2	0	1.54	101.66	21.48	327.63	21721.4	384.55	307.97	0.62	7.86	1.46	136.84	1794.97	465.57	4222.87	8722.45	277.92	10925.1	2614.08	10620	815.16	935.47	93.95	479.37	22.53	10.51	10.15	3.26	1507.58	28044.4
52	334	334-6	33727.9	1.68	27.12	16.27	254.92	231.34	0	2.71	230.68	20.63	345.58	22377.9	780.9	420.92	19.06	9.44	26.66	132.41	1807.8	457.03	4012.61	8323.36	256.95	10963.9	2651.12	10970.1	822.29	1080.8	101.19	481.09	25.29	32.86	2.06	39.79	1592.06	44027.3
53	334	334-7	2490.55	0.11	3.79	0.13	0.4	0	0	11.72	1.63	0.32	151.12	175.83	57.22	47.42	0.06	0.13	109.79	5.1	43.37	6.94	52.06	76.34	2.61	77.75	20.52	101.04	8.88	13.1	1.56	9.93	0.54	2.38	0.63	0.37	1351.63	1998.86
54	334	334-8	26003.9	0.87	10.86	1.69	166.19	30.56	0	1.08	73.42	33.57	225.81	15596.5	481.7	674.76	1.48	23.08	2.1	108.02	1503	365.04	3263.14	6436.9	202.86	8029.72	1912.73	7863.63	593.83	693.67	70.47	368.49	16.96	10.75	0.88	4.81	1682.11	33383.8
56	334	334-10	26622.6	1.1	16.67	1	195.39	54.98	0	1.17	73.51	31.35	237.74	14575	559.43	563.92	3.09	24.07	5.34	102.93	1487.47	344.79	3074.44	6121.63	187.64	7532.46	1801.17	7505.01	573.23	690.03	68.44	362.16	16.52	10.25	3.92	8.24	1727.59	38030.9
63	334	334-17	12681.8	0.61	2.42	0	75.62	4.96	0	0.62	31.84	8.03	362.21	6664.88	349.65	233.91	0.7	4.92	2.17	46.66	703.38	153.63	1389.86	2767.55	85.78	3431.58	818.99	3412.66	260.55	332.88	32.37	168.06	7.88	7.98	0.75	2.99	845.69	20583.3
64	334	334-18	5007.9	1.53	4.05	0	117.67	2.6	0	1.58	44.28	4.12	79.65	10039.8	692.69	30.49	0.27	2.66	0.45	66.49	931.97	236.1	2073.89	3857.46	117.32	4647.08	1110.58	4612.94	371.77	461.68	50.54	284.19	14.16	15.43	0.64	2.27	1100.05	27505.9
65	334	334-19	10292	0.76	4.16	0.6	64.29	0	0	0.5	32.78	9.23	97.71	6025.69	203.67	82.02	0.68	5.34	0.87	46.23	655.1	145.52	1249.98	2445.41	80.83	2919.8	704.21	2940.54	233.63	284.68	30.59	170.64	8.05	3.01	1.16	6.08	888.4	18247.9
67	334	334-21	4687.29	1.19	3.68	0.57	89.63	0.11	1.25	0.46	34.27	6.16	153.98	7328.27	573.45	4.9	0.27	4.04	0.57	63.4	790.28	194.99	1659.73	3023.48	92.23	3555.04	848.06	3541.69	281.7	346.94	38.99	218.42	11	13.32	0.31	3.5	938.53	23782.4
72	334	334-26	13556.1	0.46	11.05	0.7	113.84	0.11	0	0.59	37.02	6.6	181.75	9802.94	243.12	123.61	0.36	2.95	1.1	55.15	802.79	188.78	1746.79	3473.74	116.3	4477.79	1077.42	4561.21	369.44	459.44	47.41	253.15	12.36	4.16	1.06	1.6	892.11	20566.8
73	338	338-1	4402.56	0.3	3.92	0.81	62.68	0.03	0	3.4	NA	1.16	31.75	12016.4	86.6	1.67	0.12	0.04	21.86	83.11	1238.94	323.97	2653.78	4547.54	103.86	1321.86	5770.76	4799.85	457.59	558.22	53.62	222.13	14.37	1.32	0.18	0.34	847.35	21242.4
74	338	338-2	4566.94	0.78	1.02	1.29	99.66	0.03	0	8.62	NA	2.46	60.21	22122.4	206.54	0.3	0.24	0.06	59.11	115.14	1871.94	486.56	4090.48	7280.37	168.06	2191.41	9504.82	8220.09	854.82	1190.27	129.54	608.19	48.12	2.56	0.09	0.36	1266.89	40541
75	338	338-3	2072.63	0.49	1.67	0.92	52.52	0.07	0	3.91	NA	0.74	32.67	6590.6	233.67	0.72	0.78	0.04	26.9	69.13	885.71	217.31	1634.32	2668.8	52.41	769.65	3302.45	2873.96	274.63	337.02	32.83	137.48	8.6	2.81	0.14	1.47	813.74	21686.2
76	338	338-4	6539.51	1.21	8.35	3.33	744.01	2.09	0	30.39	NA	4.74	136.21	18166.5	466.31	10.67	1.41	3.42	189.7	210.09	2235.83	541.11	4346.33	7168.65	141.35	2121.58	9180.57	7856.2	751.44	897.21	87.04	351.03	23.18	7.9	2.53	15.54	1528.44	42943.2
77	338	338-5	4402.56	1.04	2.32	1.12	112.69	0.2	0	13.95	NA	1.08	142.15	10237.4	480.89	0.37	0.25	0.05	105.38	88.1	1272.09	326.93	2621.87	4126.42	77.72	1161.5	5034.66	4332.63	419.54	531.82	51.81	223.45	14.89	8.13	0.2	1.01	1400.85	39966.1
78	338	338-6	3880.83	0.32	1.19	0.98	156.85	0.24	0	11.62	NA	2.68	34.64	18972.9	66.34	1.42	0.13	0.11	86.87	75.65	1242.89	341.84	3001.38	5515.96	127.02	1745.29	7464.08	7002.49	789.38	1323.72	178.71	1112.25	104.06	1	0.39	1.47	870.87	28843.4
79	338	338-7	4638.41	0.43	1.8	0.71	64.26	0.09	0	5.9	NA	2.47	56.83	12008.3	157.79	1	0.11	1.1	42.35	69.61	1073.05	291.59	2447.5	4197.12	92.51	1229.89	5381.12	4668.44	473.27	686.67	79.01	446.51	41.06	3.46	0.29	0.54	846.61	25215.3
80	338	338-8	3859.39	0.76	1.81	1	144.75	0.31	0	3.67	NA	1.3	38.73	11737.4	264.16	1.41	2.5	0.04	23.82	147.3	1543.85	416.46	3031.45	4894.25	98.46	1371.38	5821.47	5137.79	483.64	603.65	58.81	259.47	15.42	3.53	0.04	5.62	1434.62	27759
81	338	338-9	1922.55	0.64	7.45	0.55	86.61	0.15	0	4.16	NA	1.8	10.79	7625.62	271.79	2.1	0.08	0.84	28.38	65.02	805.36	214.7	1766.08	2953.15	57.78	865.36	3712.71	3251.94	311.04	396.58	38.42	164.01	10.6	4.17	0.25	1.82	769.9	22218.6
82	338	338-10	30346.2	3.54	64.49	4.7	992.35	1.89	0	28.7	NA	15.53	100.65	104402	748.74	26.73	0.44	1.32	181.23	650.16	8764.9	2380.04	20056.6	34249.4	861.43	9991.43	44056.5	38009.6	3890.03	5503.56	577.84	2762.09	213.74	10.55	5.54	7.68	5089.85	162490
83	338	338-11	2937.42	0.35	5.39	0.56	142.69	0.3	0	3.69	NA	1.52	18.78	14632.7	63.36	1.56	0.05	0.08	25.58	82.17	1151.13	321.36	2789.11	4995.69	117.05	1488.36	6553.61	5532.95	554.55	740.82	78.11	353.04	26.02	1.13	0.35	1.09	703.72	23058.5
84	338	338-12	3123.24	0.8	42.56	1.11	227.41	1.34	0	13.76	NA	27.82	15.49	8222.04	182.54	7.68	0.43	32.34	60.53	307.78	1265.33	294.61	2040.91	3146.97	62.91	906.71	3882.14	3433.39	329.68	406.29	39.34	164.02	10.77	2.59	1.69	1.24	746.49	16654.9
85	338	338-13	3387.68	0.29	0.79	0.56	45.58	0.03	0	2.42	NA	1.33	19.52	12342.5	46.81	0.22	0.02	0.02	17.4	51.96	840.52	232.78	2033.72	3671.53	100.75	1140.3	4894.7	4480.95	480.78	697.47	69.96	325.63	25.5	0.86	0.09	0.14	552.33	17830.2
86	338	338-16	2472.87	0.26	2.15	0.73	50.94	0.01	0	4.74	NA	1.67	20.22	15633.9	65.6	1.04	0.06	0.03	36.15	53.65	868.85	236.77	2074.54	3879.36	88.1	1325.04	5634.88	5217.24	560.85	829.23	92.49	519.75	51.96	0.96	0.42	0.31	569.17	19380.6
87	338	338-17	3909.41	0.38	0.47	1.19	113.32	0.02	0	9.19	NA	1.76	26.68	18275	79.09	0.53	0.03	0.06	71.35	64.18	1234.18	371.14	3384.46	6396.49	134.08	1968.3	8494.39	7301.88	708.22	924.32	91.07	400.13	27.63	0.69	0.16	0.33	904.32	31835.6
88	338	338-18	3108.95	0.6	2.88	0.85	117.36	0.09	0	7.27	NA	0.89	68.34	8565.65	219.46	3.5	0.31	0.03	54.6	62	801.51	218.98	1845.21	3159.84	61.88	947.22	4084.82	3601.6	346.56	438.07	41.41	174.79	11.47	3.73	0.32	1.74	726.59	21018.8
89	338	338-19	2830.22	0.47	2.11	1.19	100.3	0.2	0	8.6	NA	2.03	28.18	18159.9	88.79	2.32	0.14	0.09	61.62	91.5	1364.62	381.97	3306.68	5957.87	146.79	1823.17	7868.76	6840.31	696.29	956.89	98.55	446	32.27	0.97	0.38	2.01	936.18	30266.7
90	338	338-20	3008.89	0.25	0.96	0.79	125.29	0.26	0	4.99	NA	1.23	20.06	11747.4	76.3	0.77	0.13	0.08	37.45	62.23	933.79	264.4	2263.24	4049.78	86.48	1217.15	5342.88	4570.5	455.74	611.17	62.51	284.42	19.89	0.65	0.14	0.62	633.19	20440
91	338	338-21	2558.63	0.62	41.79	1.22	186.75	0.95	0	10.56	NA	14.1	13.34	12746.7	66.39	7.09	0.31	4.55	33.98	207.65	1292.87	337.71	2665.65	4555.76	105.96	1335.28	5887.31	4964.77	497.45	670.34	71.97	328.52	24.09	0.97	1.61	2.56	815.99	22402.9
92	338	338-23	3008.89	0.69	69.13	1.25	217.07	3.33	0	15.35	NA	36.96	9.5	9415.27	47.97	10.21	0.54	40.75	58.61	445.36	1529.54	356.08	2362.37	3564.92	80.77	1040.2	4581.57	3738.42	341.33	417.94	37.76	154.95	9.49	1.01	3.24	1.74	772.42	17539.2
93	338	338-24	5431.73	0.6	3.48	1.5	203.67	0.37	0	9.51	NA	2.4	45.82	21246	98.54	3.97	0.19	0.12	71.29	137.16	1649.6	468.44	4034.65	7384.88	165.38	2182.68	9619.06	8168.14	817.62	1124.3	119.08	559.94	43.48	1.16	0.26	0.87	1128.16	33738.8
94	338	338-25	5288.79	0.39	0.88	0.71	73.4	0.01	0	3.05	NA	1.39	9.59	13711.9	59.21	0.83	0.04	0.02	20.36	68.87	1028.03	299.35	2671.85	4936.44	108.49	1478.78	6484.29	5397.63	525.05	688.17	69.79	312.17	22.18	0.66	0.28	0.48	786.17	24042.8
95	338	338-26	3523.48	0.35	0.65	0.77	82.75	0.1	0	4.59	NA	0.97	14.93	9541.99	100.7	0.46	0.1	0.07	33.8	64.94	870.37	248.28	2096.51	3566.36	73.22	1054.01	4582.28	3945.53	374.18	461.15	43.12	181.81	11.88	1.12	0.09	0.51	406.23	13219.7
96	338	338-27	2351.37	0.35	0	0.65	168.4	0.49	0	5.92	NA	1.69	18.56	14281	79.14	0.53	0.14	0.28	42.3	89.66	1149.99	330.59	2835.26	5089.77	107.46	1498.21	6658.61	5596.97	551.12	740.65	74.77	338.14	24.12	0.73	0.11	0.78	752.98	24814.1
97	338	338-28	4080.94	0.48	0	0.96	115.79	0.07	0	8.5	NA	1.85	29.4	18176.1	75.02	0.25	0.04	2.03	64.8	84.52	1302.97	374.55	3346.54	6018.02	146.14	1839.23	8068.78	6927.06	700.78	955.96	99.16	446.31	32.02	0.91	0.08	0.26	872.68	28795.9
98	338	338-29	5481.76	0.6	1.32	1.3	89.18	0.07	0	17.34	NA	1.09	218.94	10868.3	261.16	0.19	1.24	0.05	139.43	123.31	1299.05	352.16	2708.58	4314.28	83.72	1243.75	5395.43	4648.96	439.08	531.5	50.4	210.53	13.38	2.91	0.04	1.86	859.38	26401.5
99	338	338-30	3644.98	0.34	1.76	0.83	91.27	0.05	0	12.65	NA	1.43	50.1	12382.8	61.09	2.75	0.13	0.12	99.53	68.95	952.86	278.39	2434.16	4413.03	102.92	1310.64	5807.64	4911.84	487.31	653.64	67.87	312.51	21.19	0.66	0.57	0.76	740.31	21210.8
100	338	338-31	3809.36	0.99	2.55	1.29	97.89	0.02	0	15.25	NA	1.23	141.3	11969.5	464.44	0.28	1.08	0.05	119.68	124.19	1424.13	375.86	2896.33	4648.83	89.13	1349.13	5870.77	5121.97	488.27	603.68	57.57	242.49	15.86	6.27	0.04	1.46	1285.52	40748.3
139	344	344-5	1777.16	0.12	0.43	0.2	13.56	0	0	11.99	0.75	5.13	203.41	29.5	54.2	0.13	NA	0.15	69.63	1.56	8.14	1.26	4.51	1.99	0.05	1.97	0.77	6.53	0.99	2.52	0.41	2.69	0.14	0.76	0.02	NA	594.12	1937.56
140	344	344-5B	27244.5	595.85	1729.82	0	130.38	0.35	0	14.25	103.4	5.99	530.87	1209.61	247187	11.78	NA	1.51	77.77	2.47	17.36	2.33	9.08	5.43	0.65	16.02	6.64	97.18	26.68	118.16	33.94	375.5	39.62	11311.9	17.12	NA	594.12	3492.23
141	344	344-6	4254.55	0.57	2.74	0.71	60.6	0	0	26.28	1.54	9.45	447.54	138.2	336.1	0.12	NA	0.37	146.37	4.97	29.26	4.78	17.95	8.52	0.32	9.05	3.7	32.15	5.12	13.44	2.36	17.32	0.86	3.54	0.28	NA	566.27	7479.55
142	344	344-7	3899.13	1.16	8.02	0	116.08	0	0	9.87	1.87	8.85	213.21	341.25	751.63	0.08	NA	0.79	56.13	11.07	63.47	10.5	39.55	19.08	0.52	21.73	8.3	72.25	11.29	27.75	4.35	27.17	1.52	7.11	0	NA	575.55	15520.2
143	344	344-8	4799.2	0.9	2.91	1.68	145.67	0.27	0	22.48	3.25	8.43	375.11	416.49	546.26	0.33	NA	0.77	127.11	9.84	56.34	9.18	35.11	16.96	0.5	20.44	8.02	74.42	12.41	33.14	5.5	35.72	1.82	5.03	0.39	NA	575.55	14592.1
144	344	344-9	4219.23	0.42	0	0.59	62.86	0.94	0	43.69	2.92	8.78	485.74	230.09	198.46	2.17	NA	0.39	248.83	3.86	19.65	3.35	12.28	6.25	0.24	7.84	3.28	34.47	6.49	19.01	3.54	25.1	1.3	3.53	0.04	NA	501.29	6641.93
145	344	344-10	7408.92	0.95	4.48	2.41	164.48	0	0	28.88	2.71	17.24	349.34	316.87	573.17	0.22	NA	1.08	154.37	11.64	64.68	10.57	40.26	19.25	0.52	20.55	7.87	66.08	10.34	24.85	3.93	23.77	1.29	5.18	0.03	NA	547.71	15713.3
146	344	344-11	2289.66	1.33	2.74	0	48.04	0	0	2.71	1.39	9.67	85.46	204.92	682.85	0.05	NA	0.58	15.12	13.27	68.99	10.06	34.17	14.92	0.39	13.26	5.27	43.71	6.44	16.22	2.78	18.35	1.06	7.2	0.01	NA	510.57	14958.2
147	344	344-12	7730.78	1.01	4.9	2.21	152.34	0	0	36.89	3.77	16.81	686.26	309.93	601.36	0.45	NA	1.11	210.48	11.45	65.43	10.52	38.98	18.86	0.47	20.03	7.72	66.95	10.66	25.59	4.04	25.68	1.42	5.27	0.06	NA	659.1	15753.4
148	344	344-13	2104.91	0.34	1.28	0.42	56.82	0	0	16.43	1.84	3.64	190.3	94.4	210.6	0.61	NA	0.26	92.45	3.28	18.05	2.98	11.15	5.18	0.15	5.74	2.21	19.47	3.06	7.83	1.3	8.81	0.49	2.44	0.04	NA	594.12	4153.95
149	344	344-14	3364.77	0.88	3.53	0.65	90.33	0	0	19.1	3.76	6.07	342.7	151.58	584.6	4.31	NA	0.76	106.56	6.1	32.33	5.25	19.54	8.95	0.23	9.46	3.72	30.99	4.82	11.8	1.89	11.97	0.65	8.89	0.14	NA	584.84	8252.43
150	344	344-15	3451.74	0	7.73	1.72	231.85	0	0	4.59	3.23	10.81	166.06	247.99	259.99	0.46	NA	1.51	25.78	11.82	62.59	9.92	35.58	16.59	0.46	16.65	6.39	54.2	8.19	19.73	3.07	19.74	1.1	2.11	0.17	NA	603.4	15384.1
151	344	344-16	4813.59	1.96	5.92	0.37	21.5	0	0	40.02	2.68	10.59	550.78	39.58	751.97	1.38	NA	0.23	217.6	2.43	8.07	1.23	4.45	2.06	0.1	2.23	0.9	8.73	1.45	4.15	0.83	6.58	0.4	34.7	0.57	NA	621.97	3880.72
152	344	344-17	5197.22	0.4	4.28	1.32	157.04	0	0	21.95	5.78	6.37	457.98	244.37	247.44	1.88	NA	0.49	115.43	9.97	52.21	8.34	30.98	14	0.51	14.95	5.86	51.55	8.45	22.24	3.72	25.91	1.47	2.92	2.59	NA	566.27	10691.9
153	344	344-18	4391.28	0.42	3.69	0	158.7	0	0	11.59	4.45	6.65	277.23	213.72	240.76	0.32	NA	0.91	62.01	9.77	51.72	8.28	29.41	13.59	0.38	14.38	5.37	46.25	7.11	17.45	2.76	17.76	0.93	2.2	0.32	NA	584.84	14107.7
154	344	344-19	2291.22	0.18	0	0	49.77	0	0	13.29	3.68	3.06	249	79.73	95.01	0.06	NA	0.25	72.87	3.29	16.05	2.46	9.05	4.26	0.14	4.78	1.77	15.7	2.57	6.75	1.15	7.68	0.45	0.79	0.03	NA	538.42	5327.11
155	344	344-20	3037.6	0.64	2.93	0.87	108.04	1.43	0	17.28	3.17	5.38	281.71	164.57	351.74	1.52	NA	0.29	96.56	6.47	34.3	5.43	19.55	8.74	0.3	9.27	3.67	32.74	5.38	14.26	2.49	17.48	1	4.26	2.57	NA	538.42	10360.1
156	344	344-21	4935.44	0.41	1.83	0.55	142.09	2.04	0	30.82	3.48	6	513.53	106.06	231.16	0.67	NA	0.74	172.55	4.79	24.79	3.93	14.05	6.14	0.17	6.32	2.44	20.45	3.17	7.78	1.22	7.89	0.45	3.45	0.05	NA	584.84	5464.83
157	344	344-22	3524.81	0.26	0	1.11	61.77	0	0	9.99	1.65	4.84	201.74	185.21	195.58	0.26	NA	0.66	58.39	8.06	43.85	6.98	26.17	12.06	0.32	12.69	4.78	39.97	5.91	14.18	2.1	12.94	0.67	1.6	0.08	NA	547.71	13195.4
158	344	344-23	2984.69	0.92	5.49	0	205.65	0	0	20.84	6.6	7	240.57	174.41	562.58	2.86	NA	1.54	111.95	6.95	35.02	5.35	18.98	8.65	0.28	9.16	3.56	31.55	5.26	13.28	2.14	14.17	0.8	9.87	1.15	NA	556.99	8984
159	344	344-24	6260.67	0.76	5.09	1.02	179.11	0	4.48	20.3	7.13	8.67	709.77	264.95	451.45	0.8	NA	0.85	110.68	7.13	35.75	5.85	22.03	10.58	0.32	12.96	4.83	44.35	7.5	20.11	3.25	20.71	1.15	6.75	0.05	NA	510.57	8624.94
160	344	344-26	9402.01	0.73	5.9	1.24	130.1	0	0	36.87	3.04	10.86	839.32	233.29	459.05	0.4	NA	0.72	198.97	8.96	48.84	8.08	29.57	13.82	0.4	14.82	5.73	48.94	7.61	18.88	3	19.43	1.06	4.55	0.06	NA	640.54	13316.6
161	344	344-27	7186.25	0.57	2.54	0	166.86	0	0	37.8	9.7	15.87	822.19	174.34	307.83	0.86	NA	1.19	197.52	7.41	35.97	5.74	20.7	9.35	0.28	10	3.72	33.62	5.45	13.95	2.38	16.05	0.93	4.69	0.08	NA	649.82	9265.38
162	344	344-28	6217.93	2.53	11.81	1.11	168.69	0	0	23.9	14.82	22.31	611.88	240.83	1203.64	12.1	NA	2.91	132.5	5.99	32	5.04	18.7	8.89	0.58	10.93	4.22	41.86	7.42	20.7	3.67	25.72	1.36	32.91	2.42	NA	501.29	9698.38
163	344	344-29	11858.3	1.04	4.42	0	110.13	0	0	48.68	4.35	12.58	1333.99	191.49	544.25	2.93	NA	0.62	269.23	6.73	36.77	6.1	21.74	10.41	0.33	11.07	4.34	39.69	6.29	16.27	2.77	18.62	0.97	8.11	0.08	NA	556.99	8462.61
164	344	344-30	2992.74	0.23	3.14	0	73.91	0	0	21.33	2.48	10.41	315.03	127.41	193.04	0.19	NA	0.82	124.31	5.85	30.33	4.83	17.84	8.18	0.21	8.17	3.15	26.92	4.07	9.63	1.56	9.77	0.55	2.18	0	NA	659.1	10399.6
165	344	344-31	6133.36	0.44	1.94	0	92.03	0	0	48.31	8.86	16.7	764.49	92.69	217.07	1.39	NA	0.64	276.26	4.79	25.77	3.98	13.68	6.04	0.29	5.65	2.4	22.56	3.49	9.39	1.81	13.85	0.68	3.44	0.3	NA	891.18	7953.52
166	344	344-32	2238.35	0.19	1.48	0.21	12.29	1.65	0.69	18.5	2.57	5.05	271.64	16.28	74.11	0.64	NA	0.16	101.35	1.31	4.09	0.6	2.03	0.85	0.05	0.88	0.34	3.23	0.54	1.48	0.28	2.1	0.11	1.22	0.67	NA	454.87	1920.3
167	344	344-33	4593.36	0.47	3.73	0.9	61.59	0.26	0	47.26	5.48	7.8	585.11	93.08	273.94	0.86	NA	0.37	272.33	3.85	17.91	2.9	10.64	4.97	0.2	5.65	2.22	20.22	3.33	8.92	1.6	11.37	0.62	4.45	1.59	NA	584.84	5836.8
168	344	344-34	3377.57	0.45	2.18	0.75	59.19	0	0	38.97	5.09	9.23	408.84	119.57	250.01	1.94	NA	0.29	225.9	3.83	19.82	3.2	11.88	5.54	0.48	6.61	2.64	26.3	4.55	13.14	2.47	18.77	1.05	4.42	2.4	NA	538.42	6159.1
169	344	344-35	3584.82	0	0	0.63	41.35	0	0	36.58	1.4	6.53	412.56	108.76	102.36	0.11	NA	0.46	206.37	4.43	23.98	3.8	13.87	6.52	0.23	6.92	2.7	24.21	3.88	9.91	1.8	13	0.7	0.88	0.03	NA	547.71	6971.64
170	344	344-36	6534.71	0.72	2.92	0.72	49.63	0	0	58.71	4.53	13.63	895.39	103.97	331.26	0.45	NA	0.33	339.77	5.02	26.52	4.46	16.01	7.63	0.36	8	3.32	31.52	5	13.69	2.66	21.19	1	5.91	0.04	NA	566.27	5193.37
171	344	344-41	4342.85	0.46	2.96	0	66.37	0	0	14.66	1.98	16.97	459.57	166.81	274.49	0.17	NA	0.67	83.76	6.95	38.32	6.11	21.83	10.01	0.25	10.39	4.02	34.48	5.26	13.45	2.12	14.05	0.75	2.34	0.27	NA	612.69	9438.11
172	344	344-42	3671.98	0.92	3.67	0	37.9	0	0	25.78	1.26	10.32	359.57	101.78	517.05	0.14	NA	0.44	147.78	6.93	35.67	5.09	16.65	6.7	0.22	6.51	2.53	22.43	3.59	9.47	1.69	11.92	0.66	6.5	0.15	NA	538.42	9655.77
173	344	344-43	2575.39	0.62	2.69	0	34.81	0	0	14.92	5.41	5.33	255.79	146.04	296.72	1.7	NA	0.57	85.05	3.73	18.98	2.98	10.4	4.46	0.26	5.66	2.19	22.98	4.42	13.47	2.56	18.28	0.99	6.27	1.59	NA	501.29	4765.99
174	344	344-44	3076.55	0.48	1.72	0	39.51	0	0	25.91	1.69	6.41	304.95	64.91	254.93	0.42	NA	0.35	146.84	3.08	15.01	2.36	8.11	3.57	0.14	3.64	1.41	12.83	2.15	5.85	1.08	7.62	0.43	5.04	0.06	NA	538.42	5424.71
175	344	344-45	4534.48	0.84	0	2.35	110.72	0	0	14.94	2.31	9.17	342.06	281.21	562.76	0.05	NA	0.79	87.3	9.88	55.62	9	34.03	16.22	0.41	18.26	6.91	59.37	9.2	22.86	3.64	22.56	1.22	5.19	0.01	NA	547.71	13422
176	344	344-46	2933.44	0.81	2.96	0	53	0	0	32.84	1.25	6.01	308.26	163.49	512.41	0.03	NA	0.4	186.58	9.06	46.11	6.56	22.9	9.86	0.25	10.58	3.91	34.23	5.38	13.68	2.22	14.74	0.83	5.52	0	NA	408.46	9370.27
177	344	344-47	7281.86	0.17	0	0.98	46.86	0	0	24.17	2.41	12.4	917.98	85.23	98.81	0.2	NA	0.44	140.89	3.73	22.2	3.9	13.19	5.97	0.26	5.97	2.34	22.32	3.6	9.41	1.84	13.72	0.7	1.24	0	NA	575.56	4233.7
178	344	344-48	2839.85	0.35	2.73	1.35	49.61	0	0	3.77	0.9	7.35	156.02	185.19	206.98	0.13	NA	0.56	22.6	8.47	46.34	7.47	27.54	12.11	0.3	12.39	4.72	39.4	5.95	14.7	2.28	14.43	0.8	1.68	0.03	NA	612.69	11721.7
179	344	344-49	8981.99	0.35	2.24	1.09	39.25	0	0	24.66	2.92	14.77	762.68	166.85	179.77	3.16	NA	0.44	144.62	5.92	33.65	5.6	19.95	9.05	0.7	9.92	3.97	38.08	6.66	18.37	3.52	26.51	1.49	1.85	9.26	NA	621.97	9078.93
180	344	344-50	4419.67	0.71	4.25	0.91	70.37	0	0	18.89	4.73	13.65	513.62	113.69	391.23	2.58	NA	1.09	107.53	4.04	24.13	4.05	14.53	7.03	0.34	6.91	2.87	27.2	4.43	11.96	2.21	16.23	0.86	5.52	2.55	NA	501.29	6067.11
181	344	344-51	2951.54	1.03	4.25	0.94	149.11	0.46	0	10.25	3.14	7.07	231.18	249.66	595.49	0.26	NA	0.78	60.29	8.77	48.37	7.65	28.08	12.93	0.32	14.79	5.64	49.01	7.86	19.73	3.22	20.39	1.17	6.24	0.05	NA	436.31	11198.9
182	344	344-52	5544.45	1.99	9.83	0.87	131.63	0	0	26.77	8.34	4.36	662.81	221.17	1014.64	9.16	NA	0.43	158.76	12.29	61.6	8.66	28.44	11.81	0.72	12.52	4.83	45.75	7.74	21.55	3.94	28.08	1.6	18.78	6.89	NA	575.56	11979.9
183	344	344-53	4404.22	0.86	5.99	0.88	102.08	0.77	0	23.76	2.9	7.99	393.59	261.13	508.84	0.74	NA	0.91	140.09	8.82	49.82	8.1	31.11	15.07	0.42	16.33	6.25	53.12	8.56	21.4	3.32	20.89	1.15	4.64	2.04	NA	621.97	12509.8
184	344	344-54	2759.88	0.18	0	0.93	77.96	1.03	0	27.24	2.75	6.66	317.44	365.53	34.69	0.05	NA	0.29	158.81	3.94	19.12	3.26	12.33	6.66	0.26	10.82	4.53	52.47	10.32	31.18	5.77	38.05	1.94	0.3	0.01	NA	501.29	7095.74
185	344	344-55	2252.91	0.58	2.81	1.1	90.96	0	0	11.99	1.78	4.36	173.16	155.4	454.2	0.13	NA	0.42	69.73	9.45	49.06	7.17	24.57	10.26	0.29	10.15	3.81	32.15	5.08	12.91	2.14	14.08	0.8	4.87	0.17	NA	584.84	12038.4
186	344	344-56	4681.57	0.24	0	1.16	112.83	0.31	0	41.25	5.89	8.34	436.36	182.86	157.09	0.94	NA	0.44	240.47	6.66	35.68	5.78	20.79	9.69	0.34	10.05	3.97	37.51	6.3	17.27	3.12	22.06	1.22	1.35	2.16	NA	612.69	8262.43
187	344	344-57	4501.91	0.24	0	1.18	99.6	0	0	54.67	1.14	6.89	439.46	704.03	43.36	0	NA	0.42	313.79	5.42	25.07	4.36	17.2	9.77	0.29	18.72	7.92	96.83	20.16	61.05	10.97	70.81	3.46	0.29	0.01	NA	538.42	10384.1
188	344	344-58	2588.88	0.25	0	0.54	88.22	0	0	29.53	2.05	5	246.48	403.91	58.3	0.47	NA	0.42	179.47	4.54	21.93	3.73	14.07	7.35	0.27	12.05	5.08	58.56	12.3	37.23	6.88	46.96	2.43	0.52	1.48	NA	399.18	7367.25
195	348	348-7	11206.5	31.48	385.74	15.16	540.04	1.3	85.77	447.89	NA	77.47	602.85	40.85	21.31	0.33	NA	0.5	1573.37	34.72	296.77	3.96	12.45	2.77	2.15	0.84	3.5	6.97	1.92	7.85	1.64	19.81	3.39	1.09	0.16	NA	84.57	30.5
196	348	348-10	22984.8	722.54	7306.96	341.71	62945.6	56.04	410.25	16812.2	NA	5400.9	2617.86	53520	40575.5	261.93	NA	22.67	102660	2422.51	48633.2	1843.52	10387.5	4531.42	579.99	1381.11	5593.22	12149.9	2756.02	9937.54	2096.03	21659.5	2619.94	920.25	4.85	NA	6594.27	27790.6
197	348	348-11	26958.5	10.76	125.92	5.73	450.88	0.91	24.18	160.7	NA	61.62	276.65	98.77	25.34	0.38	NA	1.22	908.6	7.82	93.39	2.61	12.5	6.04	0.84	1.82	8.29	17.92	4.36	16.62	3.72	41.8	5.32	1.12	0.04	NA	20.95	44.13
198	348	348-12	30867.9	8.38	73.85	5.61	378.44	0.35	35.68	397.61	NA	58.42	271.33	243.41	15.53	0.12	NA	0.53	2561.25	14.21	258.43	7.14	33.46	15.28	2.4	4.88	19.8	50.03	11.28	46.23	10.52	113.47	14.88	0.64	0.16	NA	15.53	4.03
199	348	348-13	33390.8	258.79	833.82	24.37	6524.17	14.07	18.57	991.66	NA	180.02	297.28	28820.3	51473.1	52.35	NA	1.48	6017.85	257.03	6049.65	203.3	1338.1	716.15	101.5	386.62	1668.98	4083.3	1043.45	3774.58	971.86	9436.94	1334.58	1326.38	1.12	NA	1639.67	164386
201	348	348-20	8497.79	352.47	2142.67	21.44	19577.1	25.06	13.11	3830.55	NA	87.36	594.4	32111.7	77378.1	138.49	NA	0.58	21523.2	1111.59	32340.3	1182.29	6984.62	3310.16	408.93	1026.63	3991.45	8886.53	1968.97	6809.01	1611.28	15769.8	1867.17	1936.56	5.09	NA	1258.57	334329
203	348	348-25	13579.3	40.82	286.35	12.34	4695.71	5.74	30.12	824.39	NA	314.24	247.5	2414.4	1688.56	15.37	NA	1.57	5701.2	99.26	2750.76	96.54	480.86	202.89	24.96	61.13	262.64	573.53	124.67	474.8	103.06	1033.69	128.98	56.49	0.51	NA	102.63	1566.72
210	353	353-1	21398.1	506.62	419.45	16.48	620.62	109.51	95.83	9.33	NA	0.85	228.17	1651.81	1862.52	22	133.45	0.03	91.06	43.58	1846.59	369.9	1857.74	499.9	168.41	96.32	433.89	645.63	126.77	348.95	55.63	428.18	43.52	17.98	0.05	55.73	1093.78	1.55
213	353	353-4	21776.9	508.37	341.91	20.61	577.73	16.51	7.39	11.13	NA	0.77	234.31	1724.87	1873.52	21.06	180.24	0.04	124.74	44.05	1797.35	374.03	1899.01	517.42	175.03	102.92	460.48	696.58	136.49	379.4	59.06	452.46	45.97	19.99	0.05	70.3	1403.91	1.98
215	353	353-6	19182.6	451	311.81	22.19	622.71	10.3	3.98	9.44	NA	0.72	199.79	1668.7	1676.06	17.99	228.72	0.03	103.08	44.17	1634.14	331.17	1735.4	492.11	165.96	96.29	438.88	649.96	127.73	355.19	54.98	425.24	43.25	17.13	0.04	62.9	1383.81	5.15
217	353	353-8	18918.1	506.64	289.45	24.38	883.67	111.31	75.96	5.7	NA	0.77	175.95	1842.11	1927.87	18.1	313.17	0.03	57.09	47.23	1646.51	350.5	1855.91	527.23	175.49	103.26	467.44	703.22	139.03	382.98	60.53	462.59	47.24	19.3	0.03	59.57	1117.14	1.74
219	353	353-10	16288	409.8	174.78	18.46	781.29	64.9	46.96	4.94	NA	0.54	135.22	1718.98	1335.73	14.22	242.14	0.03	47.8	44.63	1315.11	284.47	1513.5	426.74	146.57	89.41	412.23	605.39	119.44	332.53	51.45	390	40.47	13.34	0.02	49.14	1203.54	2.33
221	353	353-13	16330.9	491.17	591.94	28.78	1471.67	730.29	558.86	3.57	NA	0.46	94.04	2168.2	2075.55	21.06	796.27	0.08	22.44	81.19	1742.72	387.04	2030.69	566.71	190.07	110.59	513.52	736.26	142.81	393.17	59.6	449.06	45.42	22.59	0.04	60.93	2526.33	3.39
222	353	353-15	16080.8	517.26	639.08	28.69	1232.79	560.55	456.15	3.37	NA	0.72	102.84	2360.89	2083.73	22.92	596.44	0.06	23.12	72.06	1782.07	382.04	2012.63	563.97	187.64	116.11	537.57	791.63	153.44	424.04	65.54	487.23	50.13	21.9	0.05	55.14	1844.61	4.67
224	353	353-18	18911	408.18	2388.23	22.58	900.94	263.64	307.65	6.19	NA	0.73	198.02	1741.88	2118	21.14	213.98	0.03	60.01	57.17	1719.22	335.71	1763.93	491.41	159.69	96.21	453.05	649.04	125.71	342.95	52.7	390.5	40.22	22.18	0.46	34.34	1302.92	10.67
225	353	353-19	16888.4	364.96	1518.35	19.81	690.06	116.66	99.2	6.25	NA	0.53	170.4	1514.23	1744.08	18.84	158.78	0.02	57.9	44.55	1447.14	289.15	1504.76	425.93	142.16	83.39	392.21	559.68	107.25	295.93	45.12	338.35	34.53	18.2	0.2	31.71	1341.81	4.65
226	353	353-20	19489.9	669.18	1726.83	41.02	1277.3	100.73	77.89	3.88	NA	0.94	117.02	3100.49	3073.23	29.68	745.49	0.05	23.46	78.66	2115.09	470.88	2587.45	750.1	245.35	154.56	731.09	1051.39	203.71	556.88	84.89	622.96	64.78	33.82	0.18	63.77	2748.55	7.56
228	353	353-22	22212.9	485.24	1985.19	25.33	831.85	32.94	21.51	7.52	NA	0.8	229.34	1971.07	2395.67	24.66	182.53	0.03	75.65	55.41	1821.23	351.84	1906.29	538.04	176.42	103.96	484.34	699.89	135.78	370.25	57.37	427.27	43.08	23.87	0.25	40.96	1436.64	7.03
230	353	353-24	8469.2	264.09	1927.8	18.57	842.03	281.61	518.02	2.52	NA	1.04	80.58	1287.37	1772.83	28.75	237.39	0.06	21.58	27.29	789.82	186.2	1049.46	372.3	119.04	79.29	366.02	517.52	97.07	254.69	37.96	275.11	27.09	20.56	0.19	16.55	2406.83	7.65
231	353	353-25	9562.7	387.9	3465.51	30.48	1253.72	86.25	55.25	2.54	NA	1.49	76.01	1835.85	2925.02	44.43	534.82	0.11	16.25	39.91	1188.89	277.23	1577.53	583.9	186.53	121.74	555.63	785.37	148.16	384.76	58.2	433.12	40.28	35.07	0.3	28.56	3776.61	10.63
234	353	353-28	17081.3	466.89	7438.4	73.8	2591.26	427.8	104.86	4.26	NA	1.48	88.48	2665.9	4643.47	43.82	764.28	0.74	18.33	59.9	1858.23	415.18	2119.19	624.17	210.79	128.21	616.48	848.96	170.06	461.33	69.7	511.49	53.15	52.71	0.24	50.66	5599.57	19.26
235	353	353-29	17338.7	625.12	1715.58	38.27	1548.29	142.08	85.64	4.27	NA	0.69	111.1	2632.46	3110.75	36.43	976.53	0.05	25.13	55.06	1895.43	413.29	2258.31	662.88	229.46	131.84	612.68	889.93	174.17	472.29	72.98	556.24	53.99	34.56	0.13	67.63	4111.04	8.76
237	353	353-31	17481.6	456.25	987.05	28.15	1021.72	74.29	28.49	6.3	NA	0.55	137.95	1924.76	1865.29	18.79	379.31	0.1	58.87	53.49	1419.54	320.74	1660.92	476.84	160.15	97.48	452.76	655.52	130.95	360.69	54.99	414.12	42.97	19.35	0.12	54.01	2262	2.9
238	353	353-32	14151.1	382.52	11586.8	56.36	1593.72	797.55	453.25	4.2	NA	1.2	118.54	2784.92	4464.08	47.49	670.29	0.21	26.95	61.47	1789.34	387.86	2055.88	578.71	201.97	126.19	659.25	841.53	173.12	481.16	71.61	528.23	58.94	53.58	0.84	39.67	3997.96	56.26
240	353	353-34	15123.1	409.25	2399.16	25.55	1062.85	230.49	201.61	7.79	NA	0.56	114.76	1861.16	2964.5	44.94	374.74	0.05	30.12	35.36	1236.12	274.48	1490.05	475.48	160.81	96.6	472.47	639.38	125.1	334.91	51.38	388.98	37.36	33.42	0.11	27.45	2635.17	5.56
241	423	423-6	32847.7	30.65	5.81	0.71	7432.24	7.96	0.63	24.34	NA	1.53	153.99	3517.73	3.09	0.08	284.79	0.1	239.31	458.13	1925.17	299.63	1516.47	901.28	335.95	232.49	1088.22	1292.49	223.74	562.15	81.76	593.51	61.16	0.12	0.01	17.81	17729.7	2.49
242	423	423-7	34520.1	29.18	10.03	0.52	7592.53	2.24	0.57	27.14	NA	1.49	166.82	3788.44	2.74	0.15	237.58	0.1	266.41	420.68	1862.21	303.29	1519.11	959.93	338.4	247.96	1163.17	1421.63	241.29	612.19	88.79	623.28	68.92	0.15	0.02	13.7	7769.39	2.11
243	423	423-8	37621.9	32.44	3.05	0.91	8664.65	6.65	0.63	27.99	NA	1.56	176.43	4001.62	2.37	0.1	321.79	0.15	280.2	470.84	2119.56	346.16	1728.24	1041.74	372.63	266.88	1257.94	1521.08	252.36	648.09	92.66	661.75	69.81	0.14	0.02	17.19	10427	2.29
244	423	423-9	39258.5	32.55	107.92	1.15	8918.43	9.48	5.01	81.25	NA	2.07	262.53	4127.72	5.24	0.26	269.74	0.2	780.59	514.74	2156.11	344.39	1742	1049.41	379.94	274.63	1301.27	1542.46	260.86	658.71	93.71	658.18	71.85	0.19	0.1	37.29	23810.2	6.43
245	423	423-10	47391.8	6.04	1.07	4.57	215316	98.42	110.59	13.96	NA	0.36	38.82	1400.54	2.32	0	560.89	0.02	66.61	119.71	398.76	88.39	481.55	311.54	115.15	94.91	464.37	564.3	96.1	244.86	35.12	242.96	28.86	0.03	0.01	95.24	46751.3	3.28
248	423	423-15	47627.7	42.94	2.69	0.7	11820.8	4.61	0.74	39.07	NA	1.34	263.13	4196.78	3.2	0.1	329.79	0.04	405.85	469.17	1914.4	305.76	1610.32	1022.49	380.02	277.74	1329.35	1483.67	251.72	615.93	85.92	591.26	64.99	0.12	0.01	13.7	5965.93	2.68
249	423	423-16	37593.3	36.2	6.21	0.99	9305.93	3.91	0.46	24.53	NA	1.36	205.01	3462.35	2.14	0.13	274.99	0.08	251.05	409.37	1820.52	293.23	1437.26	924.07	329.58	234.47	1102.17	1314.37	220.98	551.5	80.03	565.62	59.81	0.13	0.02	16.27	7175.22	1.94
250	423	423-18	41781.4	29.1	0.66	0.69	10358.1	4.89	2.58	26.66	NA	1.61	205.84	3396.62	2.24	0.03	228.32	0.03	271.7	360.12	1488.31	235.91	1235.61	796.33	297.69	222.66	1060.3	1206.17	201.71	501.88	70.04	483.21	53.39	0.09	0.01	10.53	5863.31	1.98
251	423	423-18A	43461	33.5	0.61	0.39	12232.1	3.03	0.57	28.66	NA	1.17	211.08	3544.8	2.08	0.03	295.16	0.05	291	376.16	1652.08	258.43	1311.33	873.92	330.85	234.61	1103.73	1263.35	213.87	532.19	75.09	522.42	56.48	0.11	0.01	13.19	8257.47	1.92
252	423	423-18B	32133	31.9	2.19	0.35	8262.67	2.83	0.51	22.75	NA	1.29	185.74	2658.29	2.1	0.08	354.71	0.07	228.26	308.27	1343.27	209.85	1096.59	689.39	259.51	183.86	856.6	1002.15	166.1	410.97	58.88	405.52	43.14	0.11	0.01	12.18	6806.78	1.8
254	423	423-22	31832.8	21.47	55.43	0.44	7154.45	2.52	0.44	36.73	NA	1.03	170.45	3147.15	2.4	0.15	208.12	0.03	372.8	369.94	1507.66	238.73	1170.58	737.3	266.32	196.23	940.69	1130.91	192.95	487.8	69.4	494.81	52.9	0.13	0.01	12.86	9632.79	2.09
255	423	423-23	42317.4	47.26	8.37	0.54	8822.05	4.26	0.81	23.04	NA	2.22	212.74	4701.1	3.34	0.21	374.78	0.19	225.98	573.22	2660.82	431.8	2123.76	1313.63	487.2	331.73	1573.31	1829.61	305.83	773.7	111.74	811.44	85.9	0.16	0.01	22.25	11439.4	2.78
256	423	423-23A	47248.9	55.32	5.24	0.61	13087.5	5	0.94	25.18	NA	1.99	211.47	4995.42	4.01	0.18	445.7	0.08	258.85	553.01	2593.14	411.86	2090.81	1366.65	488.78	346.07	1603.9	1867.45	321.07	798.46	116	816.82	85.9	0.19	0.01	22.63	11551	3.59
257	423	423-24	46348.3	40.91	0.71	0.44	11555.7	5.55	0.68	22.67	NA	1.45	259.51	3790.47	2.42	0.05	364.95	0.06	229.4	433.15	1851.07	293.37	1512.86	966.98	364.02	259.92	1217.9	1415.76	236.62	574.58	81.1	570.87	60.63	0.11	0.01	16.21	7923.96	2.55
258	423	423-25A	33941.1	32.48	1.66	0.61	8390.49	5.37	1.4	19.84	NA	1.27	162.69	3214.34	2.01	0.06	257.22	0.04	201.44	346.42	1561.49	250.52	1273.51	819.29	302.09	216.45	1024.34	1194.22	201.49	502.44	70.79	500.13	53.61	0.13	0.01	12.96	5808.66	1.85
259	423	423-30A	35749.3	18.9	0.59	0.39	8049.31	1.65	0.59	28.82	NA	1.22	183.87	3815.64	1.94	0.02	246.12	0.04	306.33	367.8	1692.76	279.61	1447.81	894.81	328.8	242.01	1146.76	1369.89	235.65	601.46	85.15	590.16	64.82	0.11	0.02	11.75	4055.99	1.83
260	423	423-30B	35127.6	32.48	2.35	0.98	8917.34	2.88	0.55	30.28	NA	1.26	181.44	3769.55	2.19	0.04	264	0.09	317.62	389.41	1754.66	280.05	1400.54	914.37	329.84	239.06	1152.22	1328.74	226.71	569.53	80.58	563.54	61.58	0.12	0.02	12.58	6067.15	2.01
261	423	423-30C	35749.3	60.85	160.84	8.86	9980.18	436.51	341.92	1083.84	NA	5.68	3621.64	6720.76	11.66	0.38	9807.88	0.47	10008.7	2253.58	5388.66	647.75	2700.7	1281.81	459.04	365.45	1750.06	2176.7	369.08	935.99	135.73	980.91	111.17	0.17	0.03	14.29	777737	38.3
264	423	423-33	31389.7	29.07	1.67	0.5	7085.88	24.06	14.73	35.52	NA	1.04	150.05	3096.77	2.06	0.06	402.53	0.04	358.92	436.42	1776.69	270.59	1323.96	816.08	299.15	209.68	977.81	1142.67	191.61	487.75	68.78	482.92	51.62	0.12	0.01	17.6	26382.5	2.6
265	423	423-34	28137.8	25.84	0.65	0.3	6199.84	8.98	0.46	24.61	NA	0.96	137.67	2653.99	1.7	0.09	369.38	0.04	238.45	352.92	1468.45	226.09	1131.11	690.74	261.47	181.71	864.93	1001.97	166.54	409.59	57.1	403.15	42.59	0.07	0.01	12.63	12118.4	1.77
266	423	423-35	37271.7	35.36	6.21	0.65	9426.47	12.12	7.58	37.28	NA	1.13	211.54	3649.37	2.94	0.17	320.22	0.04	380.89	421.58	1748.8	274.91	1436.89	888.92	324.99	239.44	1121.5	1308.75	219.93	545.4	75.74	522.95	57.5	0.13	0.01	12.8	8914.01	2.32
269	423	423-38	31218.1	30.65	4.6	0.35	8453.14	4.09	0.5	25.34	NA	0.9	150	2983.43	2.41	0.13	293.24	0.02	258.36	348.62	1492.89	234.46	1198.2	749.55	283.4	201.64	944.45	1077.41	182.33	449.85	63.41	446.84	47.27	0.1	0.01	11.41	8280.92	2
270	423	423-39	28123.5	26.47	2.62	0.43	7037.86	10.97	6.45	22.1	NA	1.01	120.37	2681.52	1.76	0.07	349.78	0.05	211.83	368.11	1517.57	233.56	1129.43	694.62	258.29	178.66	847.9	1007.06	168.82	420.2	58.78	411.24	44.3	0.1	0.01	13.84	10886.3	1.76
271	423	423-39A	37071.5	41.01	8.57	0.42	9231.79	7.19	0.59	24.09	NA	1.21	161.85	3871.05	3.1	0.18	352.84	0.04	223.16	485.48	1960.56	306.89	1503.96	967.67	350.15	248.4	1201.58	1370.61	231.51	572.33	81.94	577.01	60.76	0.15	0.02	14.27	15020.2	2.48
272	423	423-39B	37707.6	40.28	4.28	0.78	10691.3	11.84	4.15	33.82	NA	1.22	168.28	3787.52	2.38	0.1	388.24	0.04	326.32	482.56	2005.01	310.67	1496.64	948.37	340.35	238.51	1156.19	1321.2	225.45	546.01	78.55	559.56	58.91	0.15	0.02	15.05	12545.1	2.25
273	423	423-40	42167.3	37	2	0.68	9257.32	4.43	1.41	20.32	NA	1.79	182.97	3766.64	3.11	0.1	359.48	0.16	230.42	423.81	2041.78	306.25	1463.47	945.81	330.67	233.25	1089.79	1321.14	224.77	574.61	84.42	601	64.69	0.13	0.01	16.38	6006.44	2.14
274	423	423-41	33619.5	30.08	3.54	0.32	8096.92	6.53	2.12	27.74	NA	1.67	164.68	3207.03	2.03	0.13	331.69	0.14	272.45	396.1	1816.75	284.13	1344.16	838.09	282.18	204.03	993.09	1162.68	186.93	469.02	73.92	522.92	54.53	0.12	0.01	14.98	11146.6	1.82
275	423	423-41A	45998.2	37.47	0.69	0.46	10037.5	3.14	0.53	26.26	NA	1.74	200.7	4394.8	2.25	0.07	339.12	0.12	253.29	482.17	2239.34	361.55	1731.99	1092.23	379.48	274.35	1327.88	1613.1	266.12	694.07	102.4	729.17	77.16	0.13	0.02	15.75	6746.49	2.03
276	423	423-42	32168.7	33.33	5.87	0.32	8414.19	5.07	0.42	30.68	NA	1.16	166.49	3185.45	2.39	0.88	315.61	0.05	308.24	386.16	1707.55	263.78	1239.8	808.56	279.64	197.99	959.53	1121.86	188.49	469.14	69.12	488.97	51.18	0.13	0.01	17	16073.1	1.95
278	423	423-44	32990.6	33.28	5.66	0.35	8329.81	25.46	9.06	31.86	NA	1.3	151.67	3295.46	2.63	0.16	438.09	0.08	321.82	412.54	1813.64	278.08	1323.57	843.58	293.63	203.02	989.84	1145.45	194.21	489.69	71.09	507.91	52.57	0.14	0.01	16.49	13441.5	8.2
279	423	423-45	32511.8	34.25	3.65	0.34	8222.86	19.96	11.3	77.47	NA	1.14	202.5	3026.6	2.41	0.14	490.31	0.13	736.05	427.66	1748.12	264.76	1214.27	789.73	275.56	188.63	924.13	1065.13	176.66	446.12	65.36	467.96	48.55	0.12	0.01	13.6	30960.8	2.36
280	423	423-46	37171.6	27.82	1.99	0.62	7583.88	4.37	3.76	16.64	NA	1.5	157.76	3500.79	1.68	0.11	248.62	0.15	162.7	393.08	1812.26	294.27	1370.08	838.66	292.46	216.19	1059.62	1247.25	199.77	495.52	78.41	557.3	59.15	0.11	0.01	12.59	5953.12	1.43
281	423	423-46A	48063.6	39.81	0.68	0.45	10762.8	2.75	0.57	28.41	NA	1.76	226.11	4831.81	2.32	0.06	359.25	0.12	274.91	514.25	2423.41	393.61	1843	1161.17	399.45	299.78	1448.18	1719.86	283.93	709.4	105.48	758.44	81.43	0.15	0.02	16.23	5981.46	2.13
282	423	423-47	33262.2	37.16	2.63	0.35	10820.5	9.04	1.74	22.68	NA	1.09	164.58	3302.76	2.27	0.12	383.31	0.01	224.35	381.29	1696.94	268.71	1288.49	854.35	300.56	209.91	1011.62	1184.9	198.3	490.66	72.61	514.98	53.98	0.12	0.01	13.45	7905.85	1.8
283	423	423-48	34148.4	34.66	5.69	0.39	9117.82	8.97	3.17	54.01	NA	1.23	202.82	3283.78	2.72	0.17	331.5	0.08	536.09	421.48	1760.27	271.69	1333.54	832.49	305.9	215.75	1035.53	1177.15	196.77	486.34	69.33	490.26	51.89	0.11	0.01	13.68	23568.7	2.64
284	423	423-49	38007.8	39.49	1.87	0.43	11401.7	9.04	0.61	32.02	NA	1.12	182.55	3784.64	2.48	0.08	346.28	0.02	306.33	441.06	1870.96	291.68	1431.12	920.03	339.85	240.61	1126.24	1298.78	221.29	548.9	79.12	542.13	58.56	0.12	0.01	14.09	9571.31	2.03
285	423	423-50	26551.1	25.91	0.37	0.23	7585.74	10.58	2.04	29.17	NA	0.82	125.63	2537.4	1.41	0.03	254.5	0.03	292.36	326.03	1335.07	205.33	980.39	623.96	227.66	161.74	773.09	876	148.95	367.55	52.16	370.87	39.09	0.08	0.01	10.31	11917.5	1.49
286	423	423-51	10727.7	11.33	0.33	0.16	3062.08	2.23	0.52	8.73	NA	0.37	47.87	1092.24	0.67	0.02	95.44	0.01	83.23	135.73	565.15	87.35	418.18	269.61	96.78	69.06	332.85	378.62	65.07	158.64	22.93	161.54	17.18	0.04	0.01	4.51	3315.5	0.75
287	423	423-52	33798.2	37	7.92	0.33	9573.65	5.87	1.02	29.85	NA	1.17	191.41	3339.46	2.85	0.22	330.86	0.04	294.79	399.25	1727.07	270.92	1306.58	863.45	307.12	215.98	1031.36	1212.48	203.82	503.47	73.84	517.49	55.67	0.13	0.02	13.7	7044.83	1.87
289	423	423-54	45319.2	48.3	13.53	1.49	11545.6	5.62	2.53	48.46	NA	1.57	278.04	4556.59	4.28	0.27	361.08	0.07	491.52	525.58	2326.64	370.23	1747.89	1165.02	409.24	288.13	1373.39	1619.39	275.54	685.41	99.99	706.07	75.1	0.17	0.02	18.16	11115.5	2.85
290	423	423-55	41502.7	44.6	11.83	0.51	11318.8	15.46	7.63	57.09	NA	1.38	224.44	4077.19	4.19	0.26	629.86	0.1	567.6	510.8	2228.08	342.05	1617.29	1064.94	381.19	265.08	1250.64	1462.47	252.93	629.49	91.76	648.73	68.63	0.17	0.01	19.16	15315.1	3.21
291	423	423-56	33519.5	34.61	8.51	0.29	8656.42	6.08	1.31	30.29	NA	1.11	179.11	3130.59	2.82	0.2	429.86	0.06	300.91	382.08	1671.51	264.82	1258.89	815.45	277.25	198.65	959.59	1150.05	187.51	479.6	71.22	508.68	52.48	0.12	0.01	12.96	6911.48	1.86
292	437	437-1	6715.66	252.32	71.94	0	34.75	12.43	15.99	1.24	10.68	0.17	44.94	440.8	34.19	4.95	538.43	0.01	16.72	20.17	151.09	54.26	387	219.53	164.85	424.17	136.97	529.7	53.45	88.88	10.17	63.2	5.05	0.41	0.01	7.94	34.35	508.37
294	437	437-3	11049.9	88.85	221.58	1154.77	22.73	4443.69	14499.6	17.76	207.51	0	0	123.42	163.65	0.96	1289.4	0	100.04	25.43	36.28	10.65	84.1	50.59	46.83	99.61	31.74	132.13	12.73	27.26	4.28	22.28	1.46	4.49	0	7.31	40.85	12.57
295	437	437-4	12179.3	612.1	141.38	1.91	126.92	51.54	91.36	2.06	57.85	0.45	94.45	1107.17	127.28	9.16	727.16	0.04	30.02	61.45	373.7	136.42	990.33	556.92	426.02	1082.02	337.09	1374.16	132.71	219.09	26.55	171.9	12.85	1.29	0.01	16.69	34.35	322.97
296	437	437-5	41982.2	1117.07	188.46	7	369.81	1001.29	2503.09	7.6	131.8	1.46	277.26	2493.6	727.99	9.78	1704.72	0.14	85.55	134.25	763.85	289.97	2069.14	1253.13	906.74	2406.36	765.55	3096.62	304.62	520.82	60.9	383.38	29.28	11.84	0.04	20.9	34.35	230.41
298	437	437-9	24475.1	1047.11	267.91	8.72	186.37	1446.6	3995.9	11.7	95.15	3.37	191.11	1583.02	3871.36	15.71	2151.81	0.2	142.44	110.23	532.74	192.39	1349.76	823.12	589.81	1599.16	515.68	2053.95	202.94	323.28	39.1	244.27	17.88	66.59	0.03	22.91	34.35	163.23
299	437	437-10	8941.57	144.17	20.55	0	115.01	59.26	93.93	1.13	18.87	0.3	69.81	424.76	99.3	0.75	293.17	0	15.32	19.66	93.67	35.62	271.84	180.1	128.29	376.01	123.92	502.02	50.01	83.4	9.64	60.17	4.69	1.27	0	3.1	35.28	13.3
300	437	437-11	40633.3	166.08	23.96	6.87	502.38	941.36	2633.05	5.08	87.06	0.89	270.43	601.06	885.97	1	2175.36	0	60.25	60.46	125.02	37.57	248.41	184.85	143.68	444.56	162.04	738.12	77.11	130.49	14.36	89.7	5.91	9.55	0.01	3.31	34.35	207.73
301	437	437-12	20692.5	933.81	140.79	0	285.39	127.61	176.33	4.06	98.34	0.9	194.87	2031.99	423.94	8.72	3456.35	0.14	58.45	127.37	651.54	236.07	1733.04	1001.93	715.69	1991.1	623.67	2540.6	250.7	422.01	49.18	346.16	23.68	5.59	0	16.46	33.42	166.22
302	437	437-13	11146.5	621.7	123.84	0	112.84	101.16	125.85	2.47	43.81	0.48	78.98	1138.66	209.66	7.61	799.12	0.06	36.95	60.37	330.68	123.17	913.96	537.99	387.53	1058.19	335.33	1345.75	136.23	228.75	26.85	168.39	13.33	2.18	0.01	15.36	34.35	387.9
303	437	437-14	48403.3	1590.87	218.01	13.82	588.28	322.67	355.21	9.48	197.68	1.47	431.01	4026.48	1022.29	9.96	2079.2	0.2	140.51	215.39	1116.74	433.26	3184.56	1921.06	1347.9	3893.57	1224.79	4916.42	487.45	804.84	91.84	563.54	44.86	12.62	0.07	26.47	34.35	127.11
304	437	437-15	1123.46	77.04	20.94	0	11.06	17.72	25.15	0.47	6.97	0.05	8.82	118.43	70.34	1.07	5054.64	0.03	6.84	10.96	45.46	15.69	109.34	60.96	43.46	114.65	36.81	145.69	14.38	24.24	2.83	18.32	1.43	0.99	0	2.09	33.42	66.04
305	437	437-16	25295.7	1417.13	305.85	0	326.5	303.55	544.05	4.69	124.93	1.12	29.15	2623.52	703.62	12.14	3474.36	0.1	58.89	148.92	803.28	293.35	2136.98	1270.16	916.08	2483.61	786.88	3200.53	316.76	528.96	61.84	394.49	30.26	9.26	0.02	37.22	34.35	308.03
306	437	437-17	63305.7	1029.29	173.85	0	643.5	339.36	841.48	7.71	130.17	1.79	360.8	3312.86	615.47	6.44	1196.28	0	116.48	152.1	745.11	287.86	2187.32	1363.98	968.18	2841.64	914.75	3719.86	377.46	646.65	72.08	433.1	35.01	10.66	0.03	22.76	34.35	177.64
307	437	437-18	17872.5	990.06	238.52	0	169.41	275.58	308.5	4.33	64.6	0.96	142.23	1859.32	423.43	10.63	2763.21	0.05	62.05	92.12	541.99	197.85	1470.22	881.09	628.61	1713.26	542.87	2198.17	220.44	375.51	42.68	266.08	20.53	4.72	0.01	27.58	34.35	225.94
308	437	437-19	6714.38	364.93	60.95	0	66.68	33.18	37.37	1.08	33.1	0.26	47.78	683.5	120.59	4.98	2068.57	0.03	15.07	37.03	221.83	84.2	609.84	355.11	251.16	683.53	215.87	860.02	85.53	143.87	16.52	106.29	8.34	1.93	0.01	7.61	34.35	196.81
309	437	437-20	20108.9	1053.06	195.25	0	254.22	152.52	227	3.98	105.46	0.77	200.92	2047.15	813.45	8.41	2608.34	0.08	57.96	125.86	628.59	232.12	1719.28	1021.62	734.92	2026.61	648.42	2598.83	259.16	438.58	50.6	325.88	24.59	12.18	0.02	21	32.49	112.14
310	437	437-24	22853.5	1183.01	228.12	7.25	185.76	193	241.79	3.12	77.32	0.99	218.46	2292.68	1332.88	11.84	3926.7	0.28	50.3	106.11	631.71	239.68	1785.73	1069.09	802.21	2217.83	721.84	2864.55	281.34	465.3	54.31	344.95	25.12	19.04	0.04	20.07	34.35	174.36
311	437	437-25	126348	603.72	41.82	0	1418.46	154.86	369.3	6.22	85.62	0	752.21	4326.05	129.85	2.47	385.34	0	100.11	113.1	1045.68	267.86	2271.4	1595.71	1107.87	3621.91	1196.46	4994.4	503.93	842.37	90.8	543.41	44.49	1.65	0	8.09	33.42	666.63
312	437	437-26	19159.8	262.63	34.13	4.49	299.91	53.69	59.59	1.49	41.19	0.31	186.37	962.73	174.44	1.44	855.42	0	22.84	32.46	220.65	59.89	484.26	337.48	248.82	771.21	256.92	1076.12	111.17	183.84	20.88	129.3	9.88	1.93	0	4.65	32.49	23.34
313	437	437-27	46836.4	1876.94	276.06	0	418.55	42.3	0	6.2	101.95	0.93	305.61	4095.46	153.59	15.17	1603.02	0	94.99	155.58	1055.92	417.99	3153.71	1897.45	1359.23	3977.58	1258.43	5108.84	512.62	856.35	96.97	591.9	49.25	1.49	0.05	28.06	32.49	208.24
314	437	437-28	1566.56	16.72	2.7	0	24.96	39.76	71.17	0.26	5.49	0.07	18.01	68.99	37.61	0.11	2183.98	0.02	3.17	5.46	14.81	5.35	39.71	26.54	18.76	57.09	19.06	77.35	7.92	13.56	1.49	9.48	0.7	0.59	0	0.36	34.35	6.22
349	511	511-38	6896.86	1391.84	3416.64	57.13	2403.1	24.6	23.32	602.39	NA	12.48	1517.53	8017.3	41.94	8.02	15.39	0.47	5512.85	175.4	1190.76	317.41	1830.54	891.12	267.01	491.76	1390.66	3701.34	487.33	957.57	116.78	772.28	61.34	3.45	0.15	1053.89	12274.5	8.15
353	516	516-1B	1901.1	580.38	327.3	3095.24	65.35	8.97	2.3	65.04	NA	5.32	404.54	551.84	165.69	3.07	NA	0.11	185.87	25.52	59.74	27.04	166.01	156.51	52.21	76.64	272.25	430.88	55.99	119.53	16.88	116.76	8.94	3.57	0.17	NA	70.49	31.99
354	516	516-2B	1536.61	304.85	2563.46	632.69	27.68	4.23	13.85	19.65	NA	12.55	110.44	1695.9	74.61	14.38	NA	0.83	143.2	203.71	473.67	210.41	1146.5	904.71	285.97	332.23	1253.14	1687.35	200.92	382.17	50.87	361.06	26.13	5.36	0.35	NA	52.64	66.67
355	516	516-3B	1736.72	465.14	3192.84	368.73	23.2	3.32	6.26	24.62	NA	20.12	302.17	1605.44	56.32	17.63	NA	0.97	501.54	172.38	427.93	182.91	1009.34	829.32	268.56	313.99	1190.25	1609.46	189.45	369.62	50.69	363.37	27.23	5.13	0.61	NA	118.44	79.03
356	516	516-4B	1407.96	595.72	1470.2	1958.95	81.24	11.08	12.34	80.37	NA	12.18	207.16	1285.39	37.75	9.28	NA	0.49	249.9	102.75	262.52	108.97	605.26	516.41	173.4	218.81	807.21	1158.6	143.36	289.34	39.14	268.96	20.41	2.53	0.36	NA	69.01	42.59
357	516	516-5B	1529.46	382.4	2673.52	549.22	30.28	4.3	2.73	50.14	NA	20.81	329.21	1234.64	58.31	20.1	NA	0.57	824.47	123.36	309.74	137.08	760.54	641.36	213.38	245.49	936.22	1260.51	148.18	280.68	38.29	271.15	18.92	4.8	0.75	NA	131.49	78.86
358	516	516-6B	1157.82	385.94	1286.32	1025.05	46.34	8.31	2.34	93.64	NA	38.58	248.12	978.48	23.9	9.06	NA	0.4	1170.68	69.99	177.6	80.53	456.24	397.03	138.27	173.17	628.9	904.27	113.04	223.09	30.09	210.24	14.95	2.83	0.35	NA	76	16.44
359	516	516-7B	1450.84	295.59	2061.99	325.04	16.88	2.72	2.54	105.73	NA	31.78	523.3	1002.98	30.1	13.4	NA	0.45	2427.48	45.09	123.41	62.15	381.44	393.61	138.77	186.85	657.69	987.63	120.95	234.92	32.14	228.13	15.57	4.09	0.51	NA	154.21	19.37
360	516	516-8B	10720.5	1038.62	1361.13	180.3	670.9	1.79	3.11	26.37	NA	14.08	503.96	2719.75	22.59	7.86	NA	0.2	513.14	54.43	298.13	88.99	525.97	587.99	213.84	311.28	1036.27	1826.79	240.13	506.5	71.05	502.24	37.74	2.5	0.28	NA	61.77	8.63
361	516	516-9B	10927.8	826.67	1166.45	207.03	598.72	2.49	2.3	42.13	NA	17.57	354.16	2535.89	17.16	6.18	NA	0.21	835.19	53.14	275.97	84.22	523.24	578.14	211.55	296.3	1028	1741.62	222.32	464.73	64.58	479.53	34.06	2.24	0.18	NA	60.61	5.44
362	516	516-10B	7282.8	557.98	609.99	61.21	387.11	0.56	2.26	9.67	NA	5.45	167.86	1651.9	16.32	3.88	NA	0.07	217.9	35.5	200.53	51.74	317.98	347.88	126.84	184.3	630.29	1073.59	142.75	301.15	42.08	291.85	22.86	1.11	0.11	NA	28.2	3.14
364	516	516-12B	0.47	234.92	539.68	106.74	101.16	1.48	1.35	36.83	NA	9.1	227.35	719.81	12.43	3.63	NA	0.11	908.12	19.16	78.03	26.79	172.73	185.75	70.85	98.67	341.97	555.88	71.84	145.87	20.58	145.42	10.41	1.17	0.08	NA	38.47	8.5
366	516	516-14B	1.22	541.29	1309.32	227.76	281.06	3.73	4.41	85.24	NA	17.2	465.81	1669.13	15.3	8.85	NA	0.28	2146.29	55.14	207.54	78.69	464.37	500.12	181.26	244.02	858.49	1372.54	170.97	350.7	49.37	339.81	24.51	2.52	0.21	NA	68.75	5.21
367	516	516-15B	2.39	1366.39	636.17	4740.02	338.7	43.76	116.56	456.08	NA	49.11	315.99	3132.16	2.08	3.69	NA	0.46	2063.15	37.78	131.96	74.48	510.86	591.07	232.57	376.07	1249.62	2260.12	297.74	627.84	88.69	618.09	46.67	1.31	0.13	NA	45.44	2.05
368	516	516-16B	1.12	644.88	857.55	171.48	350.08	2.23	5.36	49.5	NA	12.12	610.52	2167.61	19.49	6.01	NA	0.17	1174.29	77.18	274.81	94.82	565.34	566.39	200.12	279.66	992.93	1593.38	204.9	428.39	59.04	404.77	30.65	2.37	0.14	NA	77.72	8.62
369	516	516-17B	1.29	600.41	590.38	60.58	479.11	0.56	4.62	11.58	NA	7.63	316.05	1616.47	20.78	4.16	NA	0.08	330.83	36.74	200.59	56.16	335.32	363.96	134.67	192.38	648.54	1117.93	147.78	309.51	43.24	302.89	24.04	1.54	0.1	NA	31.65	4.78
370	516	516-18B	0.13	125.05	88.96	309.44	56.82	3.82	11.51	31.61	NA	3.46	114.83	250.94	0.42	0.56	NA	0.08	87.92	4.26	19.77	7.1	45.15	49.62	18.9	28.53	94.4	166.15	22.12	47.05	6.71	46.51	3.64	0.26	0.01	NA	12.75	0.53
371	516	516-19B	1.3	742.3	729.53	135.84	527.82	1.45	3.6	27.89	NA	9.32	531.25	2065.58	18.67	5.09	NA	0.2	725.5	40.53	233.13	69.68	422.99	489.56	178.5	247.57	832.81	1456.14	188.66	400.22	56.78	406.01	29.88	2.26	0.13	NA	61.73	10.24
372	516	516-20B	1.12	649.09	675.17	81.51	472.88	1.02	3.61	14.49	NA	7.8	264.25	1830.34	19.46	5.13	NA	0.17	398.69	45.35	233.68	69.34	417.32	439.16	164.05	221.51	765.5	1317.56	168.7	356.44	51.27	363.93	26.52	1.73	0.12	NA	67.26	15.48
373	516	516-21B	10291.7	792.24	816.89	224.44	507.68	2.6	5.26	33.46	NA	8.28	627.06	2269.64	26.11	5.51	NA	0.17	645.82	46.14	259.17	74.22	452.48	501.66	187.49	279.47	948.01	1646.07	219.13	457.11	64.85	447.28	34.85	1.86	0.09	NA	64.58	8.18
374	516	516-22B	11892.6	820.13	855.58	163.09	613.66	1.67	6.64	38.82	NA	7.7	556.62	2274.29	27.65	6.09	NA	0.19	1040.47	48.33	277.01	71.64	446.74	482.36	180.49	261.41	884.85	1569.78	207.48	441.24	61.07	428.68	33.9	1.88	0.09	NA	57.6	8.25
375	516	516-23B	10241.7	751.74	825	171.55	559.88	1.71	6.18	20.89	NA	4.34	313.5	2103.5	27.09	6.04	NA	0.22	405.1	41.6	250.99	68.6	422.02	465.94	172.8	254.06	850.63	1503.61	196.98	415.9	57.78	408.8	31.33	1.73	0.12	NA	46.26	12.55
376	516	516-24B	1579.49	194.88	75.16	695.36	58.71	7.94	8.94	57.77	NA	16.57	406.36	828.93	0.61	1.51	NA	0.1	340.62	35.5	60.21	33.28	212.86	210.1	75.1	110.91	408.48	638.22	82.22	159.03	22.15	152.32	11.22	0.82	0.02	NA	120.07	2.74
377	516	516-25B	11328	1085.18	1709.38	421.46	759.64	5.71	4.89	38.86	NA	7.89	280.99	2570.34	29.29	13.64	NA	0.37	522.68	55.07	313.86	99.44	608.36	686.75	247.49	353.28	1183.87	2091.87	259.67	532.15	78.08	547.74	37.99	2.84	0.22	NA	71.97	48.59
378	516	516-26B	11299.4	986.2	1241.68	883.45	646.29	10.63	6.5	72.61	NA	9.83	709.96	2708.86	31.21	10.63	NA	0.36	527.67	80.93	321.96	111.8	691.62	694.45	253.14	356.58	1215.07	2065	264.22	542.48	76.27	540.09	38.68	2.6	0.17	NA	85.65	54.32
380	516	516-28B	7983.21	777.86	1229.87	373.11	519.32	5.16	5.4	26.66	NA	7.11	165.97	1959.6	30.31	10.27	NA	0.29	216.75	42.54	223.21	75.26	453.92	529.63	184.96	269.08	902.12	1580.33	201.73	413.52	59.1	428.35	29.82	2.14	0.17	NA	53.59	53.64
381	516	516-29B	10120.2	808.3	930.98	758.54	449.6	8.9	9.72	93.36	NA	13.09	1443.99	2428.28	17.94	8.45	NA	0.16	1475.12	53.57	228.37	78.74	497.89	548.89	204.3	303.78	1033.01	1775.71	228.9	476.68	67.22	466.65	34.44	2.45	0.16	NA	141.67	51.03
382	516	516-30B	45.74	4.18	4.13	4.03	2.38	0.05	0.15	0.36	NA	0.04	3.47	10.94	0.13	0.04	NA	0	1.65	0.21	1.11	0.34	2.11	2.35	0.85	1.28	4.44	7.61	1.02	2.15	0.3	2.1	0.17	0.01	0	NA	0.42	0.41
383	516	516-31B	6360.84	566.86	499.8	992.94	280.3	12.79	5.99	84.86	NA	9.72	1146.79	1842.63	11.71	5.22	NA	0.17	462.63	38.6	145.39	57.2	379.95	432.59	155.84	248.72	831.58	1438.4	188.25	388.2	53.57	372.79	28.01	1.2	0.11	NA	101.47	2626.87
384	516	516-32B	4531.2	357.24	617.38	288.05	241.47	4.33	10.96	21.77	NA	5.37	39.24	1081.14	17.66	5.36	NA	0.19	5.64	98.63	203.18	83.74	481.1	375.71	128.55	164.15	610.69	929.22	116.68	240.39	33.7	233.24	17.76	1	0.08	NA	15.51	49.21
385	516	516-33B	11278	960.17	1410.29	178.49	724.07	2.43	5.04	7.77	NA	7.22	69.88	2829.73	32.45	15.01	NA	0.36	16.61	135.89	410.24	142.25	845.1	780.62	267.29	373.95	1293.52	2141.92	274.34	560.92	79.35	556.46	41.23	2.64	0.24	NA	41.25	105.42
386	516	516-34B	11899.8	1072.65	1377.6	251.3	754.55	1.8	5.02	18.98	NA	7.05	447.38	2846.74	35.8	15.88	NA	0.26	287.6	57.58	316.13	96.12	602.09	663.54	242.75	355.53	1183.12	2057.39	268.97	563.37	79.64	560.97	41.4	2.84	0.23	NA	74.29	272.87
387	516	516-35B	12128.5	913.78	916.28	578.55	529.35	5.87	7.15	77.72	NA	10.1	1331.4	3008.71	38.61	12.37	NA	0.23	1263.65	67.92	290.93	95.82	626.47	709.53	257.63	391.79	1344.7	2280.84	300.09	614.82	86.55	610.52	45.51	2.84	0.18	NA	149.94	297.19
388	516	516-36B	6546.66	1981.4	158.05	3388.61	397.3	104.2	32.51	347.45	NA	126.74	665.42	14828.1	111.14	2.24	NA	1.86	1673.9	358.16	633.97	290.74	2073.22	2032.5	741.76	1196.63	5551.14	6107.5	832.28	1631.76	196.77	1349.84	120.68	2.41	0.11	NA	205.52	38.66
389	516	516-37B	6532.37	2484.66	785.51	6741.44	293.51	45.44	53.72	448.76	NA	37.7	740.91	2580.12	10.43	3.63	NA	0.51	1226.16	180.79	287.35	144.07	771.74	547.54	183.42	290.02	1013.42	1684.3	229.46	489.87	74.11	508.63	42.9	0.95	0.18	NA	130.04	26.16
390	516	516-38B	2008.31	370.34	184.74	963.4	82.66	11.73	7	90.27	NA	9.5	493.1	556.19	3.84	1.12	NA	0.07	502.78	14.74	31.65	16.27	104.53	106.79	37.62	64.1	209.14	387.1	53.03	112.75	17.21	117.51	9.15	0.27	0.04	NA	42.5	3.16
391	516	516-39B	8969.5	873.07	2515.79	725.7	323.69	12.89	10.91	146.14	NA	30.16	1673	2993.5	66.62	15.94	NA	0.64	2437.21	88.39	282.81	111.01	718.13	771.25	270.4	411.07	1445.02	2316.49	300.55	618.97	88.84	595.93	46.29	5.23	0.45	NA	184.24	46.91
392	516	516-40B	9777.11	829.11	4101.45	663.18	134.16	17.19	18.04	327.49	NA	78.17	2867.51	5045.03	136.45	29.08	NA	1.35	7946.26	341.77	657.9	338.88	2105.2	1859.32	629.06	855.71	3301.35	4491.73	555.88	1066.43	140.77	956.18	74.59	10.52	0.73	NA	350.18	65.98
394	516	516-42B	6711.04	591.58	1618.65	150.82	305.78	2.51	2.25	69.87	NA	22.05	882.81	1837.75	31.75	10.07	NA	0.46	1882.42	58.95	234.91	79.18	485.28	525.59	187.45	253.18	868.06	1444.86	184.17	376.1	54.31	395.77	27	3.08	0.24	NA	102.76	20.66
395	516	516-43B	3108.95	448.52	74.73	1324.17	73.16	9.29	27.21	94.62	NA	11.72	531.19	1251.07	0.3	0.36	NA	0.13	344.76	82.82	147.45	72.47	394.06	301.69	107.24	155.6	562.64	876.66	116.47	246.36	33.64	237.26	18.81	0.37	0.03	NA	50.3	1.27
396	516	516-44B	9812.84	707.36	619.93	66.02	460.4	1.25	3.33	10.13	NA	6.17	233.28	2036.53	21.24	4.54	NA	0.09	251.36	41.68	239.7	59.87	369.28	401.62	146.17	216.99	720.93	1279.27	170.48	366.62	51.23	366.31	29.55	1.62	0.08	NA	30.1	5.48
397	516	516-45B	8619.29	662.14	651.71	63.95	552.59	0.97	2.64	7.21	NA	7.77	212.43	1908.45	18.99	4.92	NA	0.1	208.02	41.56	231.52	65.84	397.26	428.15	157.23	225.74	741.25	1308.6	170.74	367.45	51.91	375.35	27.15	2.02	0.09	NA	32.83	47.46
398	516	516-46B	4802.79	418.97	509.61	78.19	228.13	1.2	2.15	26.38	NA	7.03	351.99	1176.34	14.42	3.51	NA	0.06	649.38	24.33	122.13	38.46	245.07	267.13	100.8	146.32	486.12	841.7	109.15	231.5	32.43	227.02	17.74	1.77	0.07	NA	41.31	4.46
400	516	516-48B	8683.62	645.07	506.77	47.74	445.07	0.42	4.53	12.08	NA	6.32	273.08	1867.12	25.79	3.63	NA	0.05	335.33	34.95	208.26	53.03	326.98	372.26	134.12	203.26	681.63	1200.96	158.43	345.84	48.16	337.39	26.73	1.8	0.07	NA	32.48	9.27
401	516	516-49B	8797.97	779.13	673.99	90.17	506.99	1.02	4.23	31.78	NA	12.33	524.35	2134.35	21.11	5.22	NA	0.13	853.63	44.55	239.58	71.37	439.48	480.2	175.52	255.84	846.44	1495.92	194.09	405.21	56.55	401.44	30.7	2.16	0.13	NA	56.45	11.25
402	516	516-50B	7797.39	686.11	616.03	80.27	544.41	0.81	4.52	3.42	NA	2.87	82.31	1801.05	20.56	6.44	NA	0.05	74.68	35.41	214.19	59.18	363.65	403.83	146.31	217.38	720.63	1299.04	169.74	355.45	49.4	348.91	26.69	1.68	0.14	NA	38.51	34.36
403	516	516-51B	9812.84	781.38	758.94	95.92	550.97	1.48	5.19	15.93	NA	4.08	260.26	2168.44	27.09	8.5	NA	0.1	427.2	43.75	231.73	63.8	406.57	454.39	163.55	243.37	821.11	1425.98	188.59	396.4	55.13	397.07	30.95	1.78	0.22	NA	52.98	81.9
405	516	516-53B	7890.3	713.8	864.79	108.6	464.58	0.94	3.82	9.13	NA	3.63	135.58	2043.46	17.66	9.47	NA	0.12	126.68	40.78	219.24	61.68	399.89	452.46	163.48	241.94	816.58	1412.26	186	380.38	55.63	385.54	28.88	2.06	0.12	NA	41.54	36.88
406	516	516-54B	10127.3	822.97	731.17	77.26	582.64	0.51	4.61	2.93	NA	2.45	68.84	2350.65	18	8.26	NA	0.13	72.22	46.53	271.23	68.27	424.76	473.35	173.88	261.86	876.71	1535.57	208.94	445.41	62.12	433.49	33.54	1.73	0.13	NA	34.34	29.66
409	516	516-57B	2773.04	181.71	60.14	654.08	41.1	7.02	4.08	54.3	NA	5.76	786.92	790.71	0.78	0.81	NA	0.11	332.19	28.28	42.13	21.06	146.62	158.04	60	96.7	341.68	559.05	75	155.05	21.33	147.81	11.68	0.6	0.02	NA	71.76	1.24
410	516	516-58B	11556.7	817.11	816.7	222.87	661.43	2.37	3.15	14.58	NA	4.75	91.99	2747.94	19.31	6.01	NA	0.12	178.8	47.24	278.91	82.96	519.01	587.61	220.06	322.57	1067.11	1918.39	250.19	520.61	74.11	536.03	39.19	2.14	0.14	NA	40.02	13.42
411	516	516-59B	11242.2	874.42	748.71	196.74	722.39	1.67	5.96	8.35	NA	4.12	61.91	2730.23	27.51	5.98	NA	0.13	53.27	48.89	299.51	83.96	525.41	587.01	217.43	322.36	1052.52	1896.33	253.63	534.29	75.27	531.15	39.93	2.26	0.08	NA	43.58	15.54
412	516	516-60B	11578.1	889.11	905.86	545.68	798.85	5.43	6.17	49.31	NA	9.74	316.62	2701.27	31.75	7.51	NA	0.22	421.02	50.07	300.98	89.75	549.5	620.62	231.78	340.85	1116.09	1989.77	261.95	538.56	78.25	546.83	41.05	2.72	0.18	NA	66.71	25.66
413	516	516-61B	11149.3	1567.91	461.33	6415.14	582.36	134.53	47.09	653.68	NA	71.96	3764.98	5289	4.11	7.19	NA	0.65	2322.39	111.8	261.26	125.91	815.87	905.05	345.46	553.21	2019.82	3186.47	437.69	918.06	134.5	1011.46	84.17	5.35	0.2	NA	852.43	12.84
414	516	516-18T	950.55	111.18	2954.42	68.99	96.94	1.88	32.5	6.92	NA	9.34	58.39	439.92	46.41	7.66	NA	1.25	46.08	43.15	340.69	51.04	319.98	293	105.51	103.24	407.3	473.65	56.92	100.77	12.63	90.24	6.19	1.65	0.33	NA	12.14	6.04
415	516	516-19T	1415.11	193.42	4502.1	57.47	99.92	2.95	24.05	15.34	NA	24.07	109.04	978.65	75.61	14.33	NA	2.83	117.09	101.08	569.94	134.33	811.77	761.87	260.58	247.73	956.19	1134.27	121.42	220.28	27.41	190.1	11.71	3.26	0.55	NA	25.84	36.97
417	516	516-21T	507.44	85.01	1735.91	45.64	40.71	1.03	6.38	8.82	NA	9.38	42.58	303.74	30.75	5.83	NA	1.22	84.33	33.86	210.63	44.28	265.84	253.34	85.23	77.84	310.87	372.78	38.88	70.36	9.13	65.57	3.84	1.49	0.25	NA	65.83	10.35
418	516	516-22T	107.21	15.77	430.32	9.45	8.04	0.21	0.83	1.31	NA	2.13	9.11	86.88	9.17	1.63	NA	0.31	12.33	9.09	48.11	12.13	72.1	68.44	23.73	21.86	85.86	103	10.83	19.72	2.61	18.28	1.08	0.39	0.08	NA	4.61	3.76
419	516	516-23T	893.38	532.51	139.94	508.11	165.85	14.71	37.54	107.15	NA	6.97	25.94	1667.15	20.72	0.8	NA	0.26	83.59	49.33	141.61	63.23	396.17	402.16	151.49	219.46	777.31	1188.97	157.98	322.29	44.41	303.42	23.34	1.03	0.03	NA	56.69	6.87
420	516	516-24T	443.11	307.8	252.66	397.2	97.56	7.66	24.65	57.73	NA	3.03	13.96	701.45	15.8	0.97	NA	0.25	15.24	24.9	76.23	29.16	178.61	172.93	64.48	92.56	327.86	528.52	69.7	146.89	20.36	146.27	10.91	0.63	0.07	NA	3.02	2.23
422	516	516-26T	71.47	7.55	202.26	4.84	3.5	0.07	0.15	0.39	NA	0.99	5.35	39.19	3.88	0.81	NA	0.11	4.58	7.69	29.68	8.18	45.68	38.41	12.44	11.75	47.09	52.16	5.43	9.82	1.22	8.15	0.52	0.17	0.05	NA	0.5	2.51
424	516	516-28T	443.11	55.77	1158.5	63.98	29.38	0.71	0.94	2.91	NA	6.91	29.78	379.97	20.44	5.14	NA	0.8	30.82	44.41	176.27	51.03	297.08	259.81	89.29	89.16	354.2	431.15	47.3	86.01	11.28	76.88	5.08	1.05	0.16	NA	5.34	31.63
425	516	516-29T	178.68	23.87	368.31	38.06	8.45	0.18	0.2	2.32	NA	2.06	12.29	85.88	4.99	1.31	NA	0.28	39.51	8.3	40.11	10.66	61.58	63.74	22.18	20.41	77.33	102.37	11.41	21.86	3.1	23.79	1.23	0.27	0.02	NA	28.19	6.53
426	516	516-30T	221.56	86.03	630.32	143.01	13.71	0.7	0.56	9.65	NA	2.85	21.98	292.68	9.74	2.8	NA	0.45	141.11	13.49	66.43	15.67	100.17	107.87	40.84	48.26	178.89	263.18	33.22	67.12	9.67	68.33	4.44	0.93	0.05	NA	163.61	8.72
427	516	516-31T	393.09	48.38	938.76	64.5	15.41	0.52	0.79	2.58	NA	5.75	23.55	312.81	16.29	5.17	NA	0.78	25.37	29.83	120.3	39.66	234.39	229.17	76.91	78.02	299.64	365.62	40.29	67.84	9.16	67.4	3.95	0.84	0.11	NA	9.91	49.82
428	516	516-32T	228.7	34.64	792.94	48.25	12.37	0.28	0.38	1.14	NA	4.82	15.2	236.15	15.26	4.64	NA	0.46	16.96	25.56	97.43	33.23	197.57	185.85	64.46	64.38	253.14	295.73	31.34	52.92	6.71	45.39	2.62	0.78	0.09	NA	1.1	53.01
429	516	516-33T	857.64	121.7	649.03	135.4	30.97	2.65	2.08	8.43	NA	8.84	35.52	1730.8	17.6	4.2	NA	0.43	34.35	84.69	223.15	103.74	621.38	591.2	218.66	278.38	1021.42	1465.38	179.39	349.6	47.53	331.11	22.61	0.93	0.09	NA	3.91	92.51
430	516	516-34T	643.23	398.3	404.76	1157.56	44.56	4.81	1.81	33.37	NA	9.94	29.97	1377.27	16.55	2.76	NA	0.37	25.72	73.18	166.95	76.41	446.42	395.72	143.23	179.43	700.6	940.91	117.2	229.49	30.28	206.36	15.17	0.91	0.05	NA	5.25	81.78
431	516	516-35T	607.5	166.66	1219.4	507.77	33.19	2.08	1.81	10.14	NA	7.06	35.65	483.88	20.24	9.1	NA	0.59	29.52	68.45	204.33	71.3	401.9	329.17	111.14	115.8	454.86	563.77	62	113.01	15.02	102.54	6.92	1.35	0.14	NA	6.33	95.39
432	516	516-36T	771.88	117.17	1807.24	420.26	29.5	1.2	1.37	4.72	NA	10.24	47.55	648.59	23.94	13.16	NA	0.96	43.89	87.44	253.02	92.79	520.59	433.97	146.62	151.66	606.39	737.46	80.53	145.04	18.87	129.79	8.55	1.94	0.18	NA	9.08	134.42
433	516	516-37T	921.96	160.27	1242.92	137.53	51.48	2.87	4.11	12.34	NA	9.41	53.42	630.24	20.02	9.51	NA	0.66	52.21	109.03	289.46	100.06	547.61	412.16	132.84	134.48	551.02	639.59	71.51	131.73	17.17	119.2	8.14	1.17	0.14	NA	23.64	90.85
434	516	516-38T	1107.79	447.52	2633.05	767.5	56.84	4.32	1.81	28.24	NA	11.88	60.98	1056.39	40.02	22.47	NA	1.42	44.64	122.26	349.24	130.98	751.5	651.66	214.18	234.33	912.81	1147.01	125.84	239.79	31.92	218.05	15.05	3.01	0.45	NA	6.69	284.13
435	516	516-39T	1100.64	264.62	2464.45	541.62	37.21	2.51	1.73	12.35	NA	10.56	55.55	1018.24	36.99	21.88	NA	1.17	42.63	114.06	309.57	122.92	705.13	606.82	202.36	219.56	845.17	1084.67	121.12	225.56	30.48	209.18	14.29	2.84	0.4	NA	5.33	252.29
436	516	516-40T	671.82	434.77	774.44	956.67	57.18	6.31	1.94	40.71	NA	5.54	36.12	627.75	14.18	6.27	NA	0.48	20.57	82	191.69	78.7	430.49	324.99	106.15	122.48	470.12	621.57	72.19	141.41	18.96	131.12	9.51	1.06	0.11	NA	4.82	74.54
437	516	516-41T	729	74.46	1092.36	92.85	14.08	1.05	1.89	2.38	NA	9.52	24.38	602.3	11.56	10.12	NA	0.97	28.38	52.84	151.28	67.07	376.63	346.78	122.18	133.84	499.29	650.01	75.27	133.85	18.14	129.92	8.66	1.3	0.13	NA	8.04	134.21
438	516	516-42T	1508.02	135.47	1693.15	220.91	26.5	1.36	1.7	3.41	NA	10.01	44.79	903.39	20.06	16.24	NA	1.19	44.66	85.86	256.01	96.97	563.01	488.02	161.31	185.55	683.55	912.97	102.24	199.47	26.86	196.23	13.76	2.12	0.16	NA	13.18	129.95
439	516	516-43T	1257.87	165.07	2983.37	303.02	39.41	1.95	2.57	4.32	NA	16.01	68.56	959.13	32.96	25.25	NA	1.6	56.53	130.25	406.19	136.07	767.71	634.87	208.82	213.38	842.95	1054.81	116.35	217.03	29.54	210.07	13.81	3.82	0.31	NA	9.24	151.25
440	516	516-44T	843.35	236.45	1791.64	469.99	36.55	3.08	3.12	14.45	NA	12.84	56.32	905.7	22.41	13.09	NA	1.17	39.41	120.31	312.8	122.34	664.93	529.05	176.86	192.23	742.19	955.6	109.36	205.73	27.47	190.42	12.97	2.07	0.17	NA	7.16	128.38
441	516	516-45T	850.49	120.46	1897.23	432.9	33.46	1.27	1.64	4.94	NA	9.6	50.81	574.79	26.8	14.43	NA	0.85	45.86	95.41	280.04	96.32	534.92	416.01	134.71	136.71	534.34	655.36	71.18	131.71	17.61	123.64	8.26	2.32	0.22	NA	11.58	108.48
442	516	516-46T	443.11	224.31	1274.38	429.19	20	1.34	1.04	14.68	NA	6.31	30.66	531.66	28.39	9.52	NA	0.6	137.17	42.84	140.86	48.23	291.77	266.68	92.31	104.73	378.62	524.26	61.56	119.93	16.38	110.9	7.39	2.02	0.17	NA	83.7	94.28
444	516	516-48T	443.11	107.09	1178.77	799.72	21.83	0.69	1.01	6.68	NA	8.23	33.81	496.81	23.23	6.79	NA	0.68	94.71	51.93	164.56	61.91	361.64	329.85	109.27	117.35	456.45	563.96	61.3	110.72	14.26	98.68	6.32	1.71	0.13	NA	39.22	109.31
446	516	516-50T	543.17	121.84	1116.13	388.17	23.46	1.35	1.55	7.46	NA	6.83	35.19	511.09	18.12	5.96	NA	0.59	45.96	62.54	185.23	65.52	374.39	319.24	104.18	114.62	446.72	548.94	62.17	114.62	14.86	102.39	6.96	1.4	0.11	NA	10.93	67.28
447	516	516-51T	443.11	61.22	936.07	188.81	13.99	0.66	0.68	2.27	NA	4.8	24.18	401.13	14.34	5	NA	0.48	18.93	41.66	122.88	46.44	265.12	226.8	76.8	82.74	325.06	403.25	45.91	86.55	11.19	78.01	5.25	1.38	0.1	NA	2.82	35.4
448	516	516-52T	621.79	91.99	1110.13	308.62	16.82	0.65	1.09	4.76	NA	6.8	35.04	360.4	17.66	6.26	NA	0.61	77.28	59.13	164.81	60.29	331.88	265.83	87.65	85.41	344.25	420.06	45.19	82.63	11.09	82.17	5.48	1.73	0.11	NA	20.38	47.89
449	516	516-53T	871.94	234.05	1679.56	710.69	43.82	2.5	2.06	18.73	NA	10.42	63.15	696.3	30.29	9.97	NA	0.84	185.73	94.31	268.52	95.46	538.47	437.94	142.03	153.07	602.05	743.43	83.88	159.76	21.18	148.73	10.34	3.28	0.22	NA	50.36	75.47
458	522	522-10	24744.9	46.8	2069.33	9.62	339.58	3.35	0	186.78	22476.1	4.44	292.1	1332.37	17362	6909.87	400.84	1.52	7126.77	92.4	248.2	54.42	282.6	173.07	22.21	206.66	59.18	488.59	105.06	346.77	63.9	500.98	47.69	208.06	110.87	12955.5	51415.6	121.69
459	522	522-11	3071.33	5.15	239.01	0.42	37.99	0.18	0	12.27	3161.33	0.18	24.25	175.73	1442.6	624.5	54.53	0.07	478.1	9.62	24.79	6.35	34.52	22.64	2.93	28.09	7.99	62.81	13.36	43.52	7.81	62.71	5.93	17.19	10.68	1412.97	7516.56	12.94
463	522	522-16	0	101.87	3305.15	0	971.32	0	0	392.02	897535	37.19	509.31	782.09	14800.7	3796.07	1071.17	40.48	13053.2	367.29	512.27	117.58	532.45	185.32	17.76	153.8	43.5	316.34	59.93	200.11	39.46	338.37	28.17	175.74	66.59	32749.5	107783	142.95
465	522	522-18	10586.2	18.8	677.75	0	97.02	0	0	42.02	11155.4	0.47	125.49	663.47	6455.38	2746.82	182.64	0	1555.89	38.63	101.81	27.92	142.02	89.01	11.47	102.37	31.38	250.22	55.03	177.32	32.77	258.22	25.6	79.89	38.55	4793.55	26014.2	60.59
467	522	522-21	687.91	1.91	15.63	0.13	4.88	0	0	1.84	738.34	0.07	8.77	62.01	686.77	176.18	11.43	0.05	69.22	2.51	7.71	2	11.02	6.44	0.82	8.26	2.58	22.21	4.87	16.35	3.09	23.48	2.34	6.56	0.4	284.31	2480.46	2.22
468	522	522-22	8396.91	30.04	1988.29	6.65	485.99	3.84	0	157.43	14725.6	5.49	138.08	385.48	9381.05	3001.81	171.43	4.34	5576.98	88.86	124.87	35.95	169.39	83.67	11.14	78.71	22.73	180	35.66	111.7	21.05	169.64	14.85	106.44	61.11	9174.29	43267.8	120.25
469	522	522-23	1180.11	1.79	67.37	0.15	10.54	0.02	0	4.65	1080.78	0.07	10.42	75.88	503.72	228.03	15.98	0.02	165.61	3.36	10.22	2.55	14.25	9.32	1.18	11.62	3.47	27.79	6.09	19.56	3.66	28.01	2.77	6.62	3.56	476.4	2774.73	4.86
470	522	522-25	115.48	0.3	15.93	0.02	1.55	0	0	0.8	172.92	0.02	1.32	7.59	84.77	32.23	2.11	0	29.21	0.55	1.45	0.39	1.99	1.15	0.14	1.33	0.38	3.04	0.65	2	0.39	3.07	0.28	1.02	0.6	67.25	555.13	1.03
473	522	522-28	9848.16	24.67	869.3	1.99	210.96	0	0	92.78	15413.8	0.9	119.84	605.46	7707.53	2947.42	141.48	0.15	3276.06	44.43	103.45	27.48	147.4	86.35	11.74	103.74	30.5	235.04	50.29	161.19	29.96	239.94	22.92	93.68	42.16	7494.19	31194.2	47.62
474	531	531-2	11582.8	37.8	2535.28	7.43	261.98	1.16	0	4.5	15025	3.86	115.89	642.25	6367.7	7319.48	4761.66	9.48	39.44	141.92	933.27	204.43	1097.6	694.85	239.46	377.43	90.3	440.14	64.32	147.74	23.52	193.12	13.65	113.75	4.96	19180.5	6089.75	354.44
476	531	531-5	12925.1	48.54	4037.28	8.03	431.16	3.23	0	4.63	11469.2	18.24	115.74	668.7	6221.87	7106.23	5947.07	41.76	40.56	92.6	688.14	155.19	815.63	595.44	189.99	343.17	75.14	400.25	54.71	128.61	20.11	160.62	13.05	116.14	7.96	20654.8	5783.4	896.45
477	531	531-6	2660.56	6.34	871.69	1.84	16.55	0.82	0	3.28	14939.5	16.62	104.89	44.05	538.38	1441.72	5698.13	12.5	19.91	32.13	126.07	26.3	139.87	73.96	20.94	31.39	6.53	33.43	4.5	11.08	1.71	14.71	1.16	26.13	1.7	8299.26	6219.71	49.58
480	531	531-10	3342.47	17.4	3754.37	6.02	25.84	0.19	0	15.9	785.7	21.75	199.4	46.75	4264.6	5890.49	3929.67	17.93	166.82	39.28	228.8	39.89	216.5	123.51	35.14	48.7	10	49.23	6.12	13.61	2.15	17.85	1.15	102.46	8.51	24778.4	575.56	283.4
482	531	531-12	270.27	1.25	161.5	0.69	3.43	0.09	0	1.43	2327.42	1.68	20.31	4.81	156.12	230.49	954.99	0.88	13.34	5.5	22.19	3.46	17.61	9.04	2.55	3.89	0.81	4.25	0.55	1.3	0.22	1.87	0.15	5.72	0.38	1589.63	798.35	29.09
485	531	531-15	12165.5	141.07	9370.29	30.22	34.38	0.29	0	9.72	5788.95	44.73	505.39	286.49	18014.9	18699.1	10853.7	46.53	92.15	173.86	1076.7	218.37	1077.53	635.25	164.16	241.77	51.69	269.77	33.57	79.39	13.24	103.55	7.09	337.02	22.52	63875.3	3258.38	2335.05
486	531	531-16	330.05	1.86	227.64	0.64	3.03	0.07	0	1.89	1444.44	2.17	20.45	6.5	455.02	492.52	839.56	1.11	19.65	5	25.28	4.33	24.44	12.42	3.52	5.36	1.07	5.48	0.71	1.61	0.25	2.09	0.16	9.71	0.61	2186.29	640.54	40.26
491	531	531-21	11671.2	56.96	4075.74	10.81	319.31	2.05	0	5.45	14653.1	27.2	211.25	581.36	5175.76	6683.22	8091.57	51.36	27.53	135.9	969	219.51	1060.18	781.29	223.92	374.59	90.25	470.69	62.35	145.66	22.95	185.67	13.83	116.33	6	24555.2	7964.94	553.28
492	531	531-22	8670.4	48.09	2339.45	9.28	312.59	1.65	0	2.41	7952.89	13.22	97.66	516.22	4032.43	4924.98	4663.62	30.08	17.49	98.07	742.86	168.43	814.84	574.84	169.9	290.09	68.95	367.67	49.73	116.11	18.75	151.31	11.63	80.84	5.61	14659.7	6934.51	355.93
493	531	531-23	4932.95	41.81	48.62	1.5	37.69	4.79	0	23.85	125150	25.94	185.72	173.02	94.93	124.72	2132.82	10.9	258.66	86.24	271.24	62.61	309.89	136.16	37.52	69.3	14.47	80.98	12.19	32.92	6.48	73.16	6.81	5.92	0.16	1906.47	1596.7	74.05
499	564	564-3	13021.9	167.31	78.84	3.95	514.27	39.94	49.86	2.5	NA	3.09	68.78	2161.75	12.68	15.22	NA	1.01	26.01	41.55	685.49	228.46	1529.55	1279.89	316.27	259.18	1129.85	1391.65	197.96	441.61	61.68	419.87	37.1	45.93	0.1	NA	10350.8	8.57
500	564	564-4	24628.6	395.03	128.5	9.45	1830.72	17.27	23.79	40.61	NA	24.2	134.81	4428	33.52	27.49	NA	7.8	46.37	104.46	1466.93	443.2	3033.28	2753.41	667.61	538.44	2447.29	2772.54	395.36	850.01	114	757.9	65.75	102.47	0.24	NA	31936.6	21.66
505	564	564-9	19111.1	331.19	143.49	18.1	1154	20.42	165.86	14.55	NA	14.35	106.89	3189.72	16.9	14.88	NA	3.84	122.31	87.69	1116.23	341.19	2314.42	1865.98	462.49	393.11	1700.82	1929.4	256.87	580.31	75.11	512.99	43.33	110.96	0.23	NA	21139.1	32.7
507	564	564-11	3223.3	81.5	23.78	2.82	206.46	1.65	3.23	1	NA	2.87	21.87	761.09	4.99	4.02	NA	0.99	12.11	21.05	315.32	87.48	580.12	527.78	122.08	96.73	458.22	491.9	69.12	147.1	19.5	126.91	11.33	26.91	0.04	NA	7687.13	5.18
508	564	564-12	9777.11	652.27	325.53	28.63	729	12.22	21.6	10.01	NA	25.74	152.32	4688.6	12.27	59.38	NA	9.4	154.51	145.2	2119.71	584.74	3855.43	3450.15	788.07	606.68	2811.49	2992.76	402.56	876.81	118.04	777.77	68.17	223.98	0.48	NA	66604.2	35.83
509	564	564-13	1979.72	121.64	72.34	6	65.91	3.44	14.25	7.1	NA	7.49	38.92	595.37	1.23	13.29	NA	2.56	66.52	24.51	383.69	113.05	727.74	572.15	120.61	78.22	379.01	403.03	52.93	119.06	15.7	108.26	9.3	46.36	0.1	NA	11735.3	10.11
512	564	564-16	4509.76	78.5	64.42	2.77	227.33	0.91	1.93	1.09	NA	1.42	22.03	848.77	5.23	10.61	NA	0.49	10.05	18.96	291.66	87.87	596.25	537.6	129.25	103.05	477.29	534.71	74.34	165.36	22.27	148.47	13.1	22.43	0.06	NA	6582.48	3.53
513	564	564-17	14051	278.21	203.96	10.24	798.45	5.98	6.25	5.49	NA	5.59	79.96	2644.47	16.79	35.26	NA	1.84	29.69	67.79	1047.74	301.11	1993.98	1758.25	412.39	329.57	1478.34	1681.08	233.11	508.08	72.9	459.58	40.22	73.63	0.22	NA	24165.7	12.13
518	564	564-22	17331.5	268.86	522.91	11.34	1145.38	95.98	41.24	17.77	NA	13	690.53	907.44	20.63	74.89	NA	5.08	301.46	59.66	560.35	140.81	1120.84	598.32	198.04	107.57	422.21	532.87	92.15	164.72	21.81	165.11	11.13	91.76	0.1	NA	28313.3	62.46
519	564	564-23	5753.34	85.85	78.64	33.09	140.87	57.31	312.69	82.2	NA	14.03	1598.6	409.5	0.82	6.08	NA	4.74	77.94	9.86	137.29	41.36	258.69	230.19	53.91	41.26	177.49	212.96	30.92	74.67	11.94	101.31	10.41	3	0.02	NA	3664.04	10.85
521	564	564-25	4359.68	63.41	23.85	2.96	264.84	2.07	3.46	0.54	NA	1.22	17.67	691.03	1.99	6.68	NA	0.34	3.79	12.2	231.78	75.13	499.37	429.91	103.36	86	352.97	462.77	66.79	150.95	21.28	141.21	12.32	12.17	0.02	NA	3566.24	5.82
522	564	564-26	18153.4	716.24	726.22	35.08	990.93	18.42	36.78	27.25	NA	13.18	356.16	2974.99	28.38	122.7	NA	4.07	115.14	91.71	1655.19	522.55	3124.58	2577.76	629.65	406.55	1665.47	2261.29	295.8	674.22	99.31	673.1	53.21	163.82	0.37	NA	76509.8	36.25
523	564	564-27	16516.7	335.08	190.76	16.08	697.35	4.27	8.21	13.14	NA	8.3	145.66	2480.68	14.72	45.72	NA	2.66	65.35	56.87	1057.05	352.06	2244.39	1865.29	477.31	324.41	1453.05	1804.98	247.94	554.57	78.62	559.74	42.93	84.16	0.14	NA	36101	15.01
524	564	564-28	9326.85	227.22	95.2	9.31	406.32	3.98	6.18	12.14	NA	9.82	73.73	1726.84	13.44	18.86	NA	2.73	57.99	42.2	716.04	233.04	1545.82	1304.01	309.66	223.17	984.58	1177.93	166.75	369.92	51.26	351.12	28.91	59.62	0.11	NA	20887.8	9.14
525	564	564-29	15201.7	332.04	193.94	12.63	581.25	11.58	17.23	9.11	NA	4.86	972.13	2197.01	13.19	39.07	NA	1.09	151.69	55.04	1007.23	313.65	2024.89	1726.97	393.19	291.04	1261.76	1495.91	218.2	480.69	68.92	468.27	39.87	89.5	0.19	NA	29854.9	15.77
530	564	564-34	957.7	15.25	9.84	3.65	37.25	10.35	61.37	15.05	NA	1.28	177.93	74.86	0.15	0.82	NA	0.89	12.49	2.6	36.05	10.95	69.41	59.44	12.62	9.12	41.59	48.28	6.6	15.37	2.22	14.95	1.42	3.21	0.01	NA	510.07	0.69
531	564	564-35	1508.02	58.14	53.71	8.21	43.18	15.56	51.93	14.87	NA	8.78	129.32	151.73	2.5	7.89	NA	2.07	61.93	6.08	107.07	25.97	168.02	123.5	27.06	19.12	83.84	101.64	13.39	30.52	4.42	28.22	2.56	14.69	0.06	NA	3207.91	3.04
532	564	564-36	2279.9	85.68	89.37	4.45	161.24	4.99	8.23	14.62	NA	8.82	22.24	669.02	3.67	15.82	NA	1.93	19.02	18.75	280.2	79.26	533.44	477.27	112.13	86.51	400.98	437.47	58.51	127.91	17.24	114.26	10.27	28.66	0.09	NA	8482.17	5.32
533	564	564-37	6496.63	163.33	178.23	4.8	488.95	4.19	6.48	2.63	NA	4.34	47.59	1461.86	12.74	34.11	NA	1.46	24.99	42	580.64	162.81	1090.96	1040.23	249.36	195.57	911.18	995.17	131.91	285.06	37.81	246.69	22.53	54.08	0.19	NA	16039.2	9.36
535	564	564-39	2672.98	166.62	92.42	11.72	123.25	8.37	7.13	23.32	NA	12.88	50.31	875.33	0.53	16.91	NA	2.84	54.58	24.49	429.7	126.93	821.77	670.31	147.15	106.17	476.16	562.45	79.26	181.58	25.71	169.97	14.65	52.22	0.1	NA	15094.9	12.62
536	564	564-40	1372.23	77.81	44.73	12.38	67.49	13.3	33.48	11.19	NA	14.55	108.22	271.95	1.15	5.53	NA	2.66	44.85	14.27	222.4	56.71	392.01	291.56	59.05	37.23	180.34	191.56	26.08	58.92	8.38	57.93	5	35.84	0.09	NA	4200.65	14.6
539	564	564-43	11906.9	122.57	33.16	2.83	681.57	2.73	4.83	2.39	NA	0.94	56.67	1952.81	10.15	8.89	NA	0.27	19.98	35.24	574.84	178.71	1224.4	1142.14	283.79	234.99	1025.25	1218.61	172.43	382.97	52.16	349.49	30.8	30.04	0.08	NA	5507.01	6.97
540	564	564-44	19368.4	220.77	86.44	4.84	2110.13	7.19	10.27	1.86	NA	2.15	68.35	3549.15	21.75	15.2	NA	0.5	11.4	76.01	1029.27	304.66	2082.03	2141.89	550.47	465.63	2100.32	2342.71	320.2	683.68	91.45	595.15	54.19	62.15	0.17	NA	13089.7	14.92
541	564	564-45	7733.06	75.82	40.5	1.82	557.88	1.95	3.51	0.6	NA	0.64	32.09	1255.66	7.61	5.93	NA	0.17	4	27.52	387.95	111.66	752.56	737.3	186.2	159.25	705.62	805.97	110.12	241.61	32.53	213.71	18.81	20.54	0.05	NA	3579.65	4.98
544	564	564-48	20011.6	342.09	266.86	14.54	1084.19	10.96	14.52	34.14	NA	22.73	125.65	3343.5	26.96	26.79	NA	2.36	77.91	63.54	1197.16	382.6	2524.09	2201.98	521.49	424.97	1816.67	2288.67	337.25	756.08	105.35	708.21	60.65	61.58	0.18	NA	22198.3	19.39
545	564	564-49	21312.4	291.82	141.84	13.58	1141.15	16.97	14.53	17.02	NA	11.6	86.51	3300.88	27.09	19.35	NA	1.35	29.11	59.91	1140.76	353.43	2371.84	2111.36	485.29	414.75	1744.36	2288.27	326.08	731.6	101.54	681.85	58.84	53.23	0.15	NA	12246.3	17.67
547	564	564-51A	19561.4	223.8	70.89	6.92	1240.12	6.41	10.96	3.82	NA	2.27	80.56	3071.84	19.61	6.98	NA	0.65	14.29	60.24	973.91	308.11	2034.56	1888.95	442.05	378.04	1642.66	1999.52	284.04	612.69	86.07	575.13	48.72	46.49	0.1	NA	9193.45	17.85
548	564	564-52	15830.6	1309.66	3699.85	166.29	933.14	69.26	154.67	33.51	NA	35.79	320.14	3588.23	7.69	516.61	NA	17.61	398.39	172.44	2754.34	713.33	4912.18	4079.79	827.92	567.62	2415	2833.4	378.97	840.52	123.82	860.02	68.96	519.27	2.27	NA	80394.1	71.96
549	564	564-53	20469	265.5	58.99	8.81	1589.11	6.84	10.81	3.12	NA	3.9	84.57	3299.43	27.25	11.81	NA	1.25	33.98	70.79	1050.81	326.54	2232.62	2122.65	523.99	439.05	1939.68	2258.39	313.09	670.18	92.48	614.49	54.19	64.14	0.14	NA	16553.9	18.35
550	564	564-54	17002.7	399.5	180.66	12.76	849.54	30.4	111.24	14.05	NA	14.62	85.76	3420.84	0.99	35.75	NA	4.2	195.17	68.35	1254.73	401.2	2660.34	2234.54	491.82	392.61	1728.25	2170.67	302.53	684.98	96.54	635.68	53.92	87.93	0.19	NA	35422.6	46.59
551	564	564-55	18539.3	283.93	88.6	10.08	1305.43	6.67	14.32	10.12	NA	7.17	75.44	3175.52	20.35	16.83	NA	2.06	49.53	68.82	1081.94	328.62	2229.84	2015.58	505.78	412.15	1815.06	2104.86	296.28	652.06	87.64	574.67	51.61	70.55	0.19	NA	18688.3	22.26
552	564	564-56	17331.5	296.11	121	13.03	874.43	4.89	8.61	4.51	NA	4.62	81.03	2968.03	22.51	22.74	NA	1.23	36.42	54.08	1063.19	345.76	2265.03	1943.81	450.5	361.37	1496	1986.63	290.28	654.83	93.24	623.31	53.09	66.89	0.12	NA	17131.1	14.64
553	564	564-57	3852.24	54.46	13.61	1.87	204.06	1.22	1.94	0.9	NA	0.38	17.54	647.69	4.66	2.49	NA	0.11	3.01	11.52	199.61	63.61	439.8	385.48	90.94	80.42	350.07	433.02	61.36	138.33	19.08	123.79	11.25	10.29	0.02	NA	1808.41	3.2
554	564	564-58	22127.1	321.24	119.36	11.37	1220.17	6.27	15.31	7.29	NA	3.74	103.5	3594.15	27.95	14.61	NA	1.05	20.11	70.29	1170.47	368.22	2526.05	2245.43	536.33	451.52	1975.24	2455.1	342.19	773.71	107.9	721.92	63.57	59.42	0.19	NA	12107.8	24.87
555	564	564-59	15959.3	196.65	70.76	6.12	1466.28	6.92	9.13	2.42	NA	1.7	60.97	2930.36	21.44	6.38	NA	0.59	10.1	61.61	879.76	261.83	1845.5	1779.14	435.06	380.03	1705.53	1969.18	269.07	602.01	79.54	523.04	47.09	46.66	0.11	NA	8698.88	15.72
556	564	564-60	20619.1	248.31	76.49	5.83	1718.1	7.78	9.22	5.17	NA	4.43	78.32	3561.89	23.8	7.79	NA	1.09	15.06	71.69	1054.24	322.76	2248.33	2162.84	528.01	454.24	2042.09	2372.31	321.51	715.57	94.96	636.23	56.66	65.02	0.17	NA	12901.3	17.23
557	564	564-61	19690	252.37	47.55	7.31	1585.39	7.48	10.34	2.9	NA	2.52	74.96	3517.18	25.49	8.67	NA	0.86	13.64	70.85	1050.28	328.84	2275.35	2152.62	526.16	458.92	2033.51	2380.81	329.21	725.61	98.18	633.63	58.26	58.44	0.11	NA	10957.4	18.02
558	564	564-62	17931.8	326.59	142.52	15.65	938.56	9.48	14.77	21.06	NA	15.49	88.65	2925.1	23.93	25.13	NA	3.23	63.93	68.55	1140.56	337.89	2419.13	2089.85	496.31	396.12	1676.67	2008.19	288.35	641.88	89.39	609.11	51.05	85.4	0.16	NA	27652.6	19.5
559	564	564-63	17117.1	226.76	55.09	7.32	1177.88	6.75	9.53	3.82	NA	3.92	76.3	3003.23	21.78	8.7	NA	1.05	22.29	61.98	954.37	284.33	2054.48	1872.81	449.1	382.74	1677.98	1987.25	276.16	609.06	82.41	546.17	48.99	62.39	0.11	NA	14639.1	17.92
560	604	604-1	2.35	118.89	316.02	6.55	2.05	2.63	6.87	3.06	NA	1.26	0.85	6.2	31.25	1.87	608.05	0.42	20.06	3.87	10.97	1.26	5.95	3.46	0.86	1.15	6.92	5.18	0.53	0.71	0.05	0.22	0.02	1.12	0.27	43.81	2302.22	8.89
565	604	604-6	11.16	389.91	251.13	3.05	1.91	1.75	4.34	6.43	NA	4.89	1.23	20.47	20.69	1.53	105.29	0.11	47.16	5.98	17.02	2.71	13.67	11.86	2.93	3.57	19.38	15.65	1.61	2.39	0.21	1.15	0.09	0.66	0.16	33.89	2023.73	8.51
566	604	604-7	3.12	238.62	743.21	7.11	2.06	2.26	8.22	5.38	NA	2.64	1.1	11.27	57.78	7.02	344.97	0.4	34.17	6.1	15	1.66	7.88	5.17	1.27	1.75	10.24	8.11	0.85	1.18	0.1	0.46	0.03	2.28	0.61	125.97	2460.03	3.29
568	604	604-9	11.15	301.34	318.23	4.07	0.97	3	11.12	13.28	NA	7.45	2.89	33.86	22.15	2.71	121.96	0.26	89.87	12.33	29.17	4.05	19.64	13.85	3.35	4.89	27.83	22.56	2.46	3.58	0.3	1.55	0.12	0.81	0.18	61.59	2933.47	5.06
569	604	604-10	39.07	253.79	9.69	3.85	0.85	7.22	23.25	0.83	NA	20.24	1.92	55.09	0.15	0.01	150.47	0.12	8.52	20.63	58.38	10.75	60.04	56.61	12.71	11.73	70.1	43.2	3.87	5.65	0.53	3.05	0.25	0.01	0	1.85	5699.85	5.95
570	604	604-11	1416.54	1918.24	2811.81	30.96	1778.1	15.53	21.07	17.44	NA	16.74	19.41	1198.36	220.01	19.9	200.01	1.02	108.1	36.81	134.57	21.87	125.3	138.82	41.5	83.43	361.98	481.2	70.51	139.02	16.24	100.32	7.9	8.16	0.83	846.77	5913.36	115.18
571	604	604-12	11168.3	21142.9	39039.3	267.74	13558.7	86.82	32.72	41.72	NA	183.25	125	10497	1320.14	267.64	10649.9	15.52	318.71	288.47	1183.76	199.94	1131.69	1266.69	365.11	719.76	3052.14	4300.55	618.23	1239.24	146.77	933.71	74.3	65.32	8.99	10208.8	50834.5	920.9
572	604	604-13	50793.6	63475.3	53796.3	578.9	64780.1	330.52	622.31	62.66	NA	245	638.14	41501.2	1787.12	295.26	3815.9	11.75	517.61	587.35	2698.96	507.04	3086.99	4032.22	1235.84	2454.4	10474	15719.8	2310.28	4833.26	559.63	3408.83	280.11	112.84	9.57	22094.5	51243	2501.16
573	604	604-14	20294.6	42741.3	48222.9	393.07	26159.3	158.89	256.59	55.55	NA	469.32	231.08	17425.2	1440.31	378.02	3483.85	20.58	548.52	355.32	1487.78	272.84	1611.47	2024.84	604.92	1186.99	4919.1	6864.63	1019.45	2009.48	235.86	1450.72	112.8	80.51	10.72	14092.9	59505	1433.71
574	604	604-15	12519.7	31400.7	46125.1	292.96	14904.4	137.17	149.43	60.68	NA	585.32	133.42	11660.6	1055.61	306.85	4395.76	22.2	701.54	237.46	1012.84	198.87	1177.55	1518.64	453.45	820.05	3416.61	4955.82	725.62	1406.75	164.06	1019.34	76.12	61.59	9.83	10580.1	51038.7	967.77
575	604	604-17	1323.98	2629.82	3143.36	28.5	1594.29	16.06	21.47	4.48	NA	52.16	14.59	1314.04	140.75	23.99	7911.76	1.71	50.12	32.11	127.95	23.73	139.03	163.85	47.32	92.67	395.15	534.34	78.29	154.74	18.18	112.66	9	7.03	0.93	1006.11	8076.34	112.76
576	604	604-18	22098.4	36993.9	50411.4	430.29	28423.4	178.61	217.85	57.58	NA	505.97	238.71	19545	2274.56	380.4	3575.78	20.46	602.76	379.19	1595.94	294.97	1752.98	2233.83	679.49	1262.73	5320.06	7893.99	1177.38	2332.49	272.68	1701.86	131.77	111.33	15.96	14989.8	56339.4	1602.97
577	604	604-19	17008.1	25294.5	35132.4	302.98	20703.2	108.25	36.31	24.77	NA	208.39	179.2	14891.5	1608.54	302.69	2457.92	12.56	229.26	295.86	1222.37	213.91	1274.85	1592.99	477.34	968.51	4088.79	5772.97	863.67	1744.21	205.47	1279.47	98.66	82.37	11.98	11090.4	33178	1230.33
578	604	604-20	41859.9	52159.7	33962.1	476.11	51360.4	221.67	0	129.86	NA	203.86	403.09	38095.8	992.78	320.78	6488.37	4.79	727.61	614.48	2636.08	458.78	2781.3	3577.69	1098.11	2392.06	10381.1	13710.7	2067.53	4118.88	492.35	3028.68	255.16	77.42	6.24	16300.7	50351.8	3079.37
579	604	604-21	17326	20846.9	12865.1	179.47	19829.2	67.59	0	30.98	NA	99.48	156.3	15030.8	652.92	131.87	98369.7	3.67	302.91	231.05	988.12	180.79	1108.79	1462.92	469.49	880.07	3813.93	5444.37	742.43	1646.29	195.83	1232.35	98.61	43.03	2.92	9253.32	52765.4	1302.43
581	604	604-23	27407.2	32652.3	25406.6	313.45	31965.5	120.06	0	50.89	NA	134.5	246.31	23940.6	1279.58	303.57	74430.9	6.44	376.75	357.97	1576.8	287.15	1772.06	2314.7	765.13	1421.36	6212.74	8908	1205.04	2667.12	317.68	1985.77	160.46	77.58	7.41	15050.7	50927.4	2119.44
582	604	604-24	36984	44554.5	43545.2	476.81	44432.7	96.45	0	49.61	NA	214.13	370.12	29696.1	3431.87	479.49	7101.58	10.76	371.1	516.3	2309.32	404	2404.2	3051.93	987.18	1919.11	8162.45	11517.8	1713.3	3443.5	401.44	2486.43	200.54	152.73	13.73	20357.1	55011.9	3670.03
583	604	604-25	16520.4	28282.1	32118.4	261.27	18787.2	81.96	0	39.99	NA	366.22	166.82	15541.1	2980.01	311.53	3462.4	11.35	435.69	347.62	1403.51	259.93	1530.5	1820.74	544.35	1075.78	4591.42	6229.75	934.56	1869.35	217.88	1351.11	108.34	112.1	16.35	10469.7	49098.6	1532.38
584	604	604-26	99.23	1521.09	945.6	32.2	165.68	33.61	125.21	44.57	NA	2.76	9.25	125.14	161.61	19.45	2071.96	0.08	191.02	43.52	101.12	13.08	67.76	44.2	10.72	18.14	90.01	100.48	11.15	19.1	2.14	12.59	0.82	4.25	0.22	460.23	49618.4	81.23
586	604	604-28	79.25	2327.47	1452.95	105.57	12.34	20.68	47.32	149.74	NA	29.62	23.96	335.66	63.44	48.62	5978.88	2.62	736.18	154.18	347.21	46.49	205.89	130.53	30.56	40.79	231.32	201.5	23.45	39.49	4.12	26.38	2.37	2.72	0.25	551.79	80689.1	34.97
587	604	604-29	9288.35	18997.5	18756.8	182.04	11143.9	197.8	235.26	43.97	NA	287.88	100.49	9031.93	765.46	145.62	7202.5	10.29	504.09	196.86	838.35	154.09	903.71	1063.31	324.18	593.01	2466.82	3533.74	528.08	1068.8	126.74	804.81	65.15	39.45	4.67	6677.42	54352.8	738.33
588	604	604-30	19551.5	34483.2	22079	294.94	24221.5	95.96	0	55.32	NA	148.74	216.78	15887.3	410.11	114.29	3205.7	5.36	424.06	354.58	1500.31	266.19	1523.92	1787.1	548.82	1083.77	4521.85	6311.23	944	1919.79	226.65	1433.68	114.96	42.68	2.59	12000.6	57472	1427.9
589	604	604-31	10010.1	10921.7	6492.53	109.15	12296.4	60.55	0	27.33	NA	23.61	111.27	7731.69	102.16	53.59	1347.76	0.85	133.3	148.52	639.87	109.31	643.62	798.04	249.42	524.05	2230.5	3079.22	453.38	938.5	110.33	685.13	56.4	14.87	0.86	4697.98	13692.6	542.94
590	604	604-32	18194	33854.7	16991.8	223.82	21012.4	63.8	0	28.62	NA	197.42	205.86	14879.9	591.28	162.86	1649.32	5.91	274.82	231.05	1130.91	208.45	1234.92	1559.16	483.52	927.02	3911.23	5699.85	825.83	1700.44	199.67	1261.87	98.18	42.29	3.8	10069.1	38487.9	1412.82
591	604	604-33	28425.6	37291.4	25789.1	364.45	33201.6	92.5	0	49.78	NA	132.23	314.03	25280.8	654.45	285.22	3965.54	11.22	365.88	426.81	1896.95	340.86	2037.43	2544.44	777.7	1651.68	6922.43	9143.23	1423.74	2869.72	336.87	2107.64	171.28	55.98	4.14	14579	48068.1	2551.37
592	604	604-34	10363.9	15102.1	10730.6	161.16	11503	35.17	38.87	123.25	NA	137.95	131.59	9053.33	427.47	70.21	5729.91	3.87	593.96	217.1	819.28	144.24	834.58	973.74	297.54	570.47	2480.1	3539.78	523.03	1070.26	123.81	770.88	61.66	24.62	2.31	5023.87	38877.8	634.1
593	604	604-35	19727.1	30718.7	34686.6	334.99	22545.7	95.49	0	36.24	NA	250.05	199.38	17526	4805.96	398.42	12003.1	10.82	379.94	325.25	1367.58	249.46	1480.5	1857.56	579.11	1141.83	4812.14	6706.39	1010.79	2044.84	241.27	1505.93	117.58	156.18	26.65	12190.5	50101.2	1509.21
594	604	604-36	29535.5	37055.4	43541.9	389.59	34688	70.75	0	45.63	NA	221.28	319.75	24884.3	1529.41	438.03	2870.02	11.24	474.88	393.34	1853.39	329.97	2003.26	2541.04	795.36	1653.52	6968.49	9452.03	1420.4	2951.81	346.44	2152.18	172.84	88.18	8.05	15265.9	49822.7	2819.16
595	604	604-37	66172.1	71421.2	80994.3	718.17	79222.7	135.2	0	57.22	NA	196.46	665.58	49086	2549.76	667.27	5275.82	17.46	483.08	792.04	3567.4	624.19	3800.85	4979.23	1683.72	3284.65	13511	18886.8	2857.92	5800.13	681.06	4209.01	336.33	165.68	16.32	31536.6	48718	4178.84
596	604	604-38	129216	141925	66330.6	1208.61	149508	351.44	0	96.29	NA	154.99	1390.37	107317	4194.46	826.96	22945.2	7.52	767.4	1389.97	6067.72	1187.84	7354.26	9876.46	3211.54	6288.12	26655	39317.5	5548.57	12096.6	1411.83	8855.25	723.43	262.3	25.42	51805.7	50936.6	9162.2
600	623	623-1	373.88	1.67	112.76	0.48	5.79	1.54	0.62	1.34	7123.05	5.96	11.01	12.64	77.41	81.91	4448.56	2.05	11.11	2.24	9.58	2.34	14.32	8.82	2.43	5.54	1.02	5.36	0.83	2.05	0.33	2.82	0.28	4.39	0.14	1426.02	5149.36	18.3
601	623	623-2	874.26	1.84	232.03	0.8	8.16	1.1	0.15	7.95	5275.99	10.5	29.03	21.59	144.86	337.24	6010.57	3.45	72.41	3.4	15.82	3.39	22.46	12.9	4.03	9.67	1.64	9.03	1.41	3.54	0.55	4.57	0.44	9.08	0.43	2965.88	505.93	21.2
603	623	623-4	728.04	3.02	180.39	0.47	20.53	1.17	1.2	0.44	1734	1.45	14.3	33.31	174.05	154.62	1858.08	1.02	4.06	3.52	27.72	6.33	38.36	26.78	8.5	16.32	3.26	16.32	2.45	5.92	0.92	7.36	0.64	5.76	0.93	1529.22	1866.84	93.39
604	623	623-5	5417.67	6.76	706.2	3.13	34.2	3.55	0.69	5.83	15390.5	25.47	130.75	86.05	331.03	860.21	28882.8	13.73	53.48	21.67	89.9	20.32	119.27	72.57	23.26	45.64	8.58	44.22	6.42	15.38	2.41	19.44	1.72	23.21	1.5	7946.75	4654.57	120.82
605	623	623-6	2371.06	8.08	716.68	3.02	24.49	2.5	0.92	4.58	7826.14	12.55	59.36	68.17	858.72	888.61	14771.9	7.52	45.32	13.01	79.04	17.95	103.64	69.47	20.83	41.25	7.95	42.11	5.8	13.74	2.23	17.9	1.49	25.59	1.54	6408	6270.77	140.33
606	623	623-7	2605.82	1.6	257.86	1.21	9.63	1.28	0.16	3.79	14198.9	16.21	121.5	33.74	151.91	424.27	12318.3	7.65	31.27	28.48	66.53	10.13	54.56	25.48	7.14	16.71	2.85	15.22	2.31	5.78	0.91	7.67	0.78	10.17	0.55	2921.38	1687.68	7.21
607	623	623-9	311.61	0.3	34.82	0.21	1.99	0.25	0	1.27	4169.62	4.26	5.42	6.32	10.93	54.75	2251.03	1.56	7.88	0.84	3.29	0.8	5.27	3.21	0.99	2.5	0.46	2.56	0.4	1	0.17	1.56	0.16	1.38	0.05	465.48	288.71	1.18
608	623	623-10	13337.6	5.92	1006.32	3.72	44.87	7.15	0.38	10.16	42832.5	60.88	225.16	119.91	315.51	1652.81	77337.1	32.48	93.38	30.2	106.12	22.42	140.2	78.89	24.77	59.23	10.37	55.71	8.42	21.02	3.35	29.61	2.92	37.03	1.54	13140.2	3978.76	23.65
609	623	623-11	489.29	1.2	168.19	0.6	6.25	1.57	0.26	0.65	3225.57	4.16	11.06	12.43	79.04	174.05	6568.15	2.24	8.51	3.17	18.79	3.94	22.41	12.35	3.68	7.53	1.43	7.53	1.08	2.54	0.42	3.49	0.31	5.29	0.38	1735.37	6825.9	28.38
610	623	623-13	1220.49	20.34	615.97	4.14	3.06	0.3	0	1.64	692.75	9.9	50.89	27.33	1970.21	1163.21	2423.12	6.08	14.83	9.6	46.99	11.93	73.91	33.42	8.95	18.51	2.79	13.68	2.1	5.03	0.77	5.5	0.56	33.15	2.2	4393.74	582.05	415
611	623	623-14	1780.88	2.21	467.47	1.85	11.81	1.7	0.6	2.91	6544.35	8.7	36.71	25.31	162.35	504.85	11602.4	4.95	29.22	6.7	26.63	6.18	36.37	22.27	6.74	14.64	2.79	14.57	2.08	5.18	0.83	6.95	0.63	12.74	0.72	4222.07	2433.11	22.14
612	623	623-15	13.5	0.04	3.29	0.02	0.07	0.01	0	0.1	32.1	0.18	0.92	0.13	2.85	4	91.59	0.06	0.93	0.05	0.2	0.04	0.25	0.12	0.03	0.07	0.01	0.06	0.01	0.02	0	0.03	0	0.11	0.01	31.55	81.69	0.84
613	623	623-16	4662.25	17.37	1117.36	4.84	84.14	4.67	0	5.15	59791.5	39.78	180.2	208.23	1035.15	2046.58	10683.7	15.97	52.9	34.53	208.43	48.78	284.63	159.84	54.17	107.96	21.92	117.65	17.72	41.83	6.65	55.43	5.25	56.96	4.03	17389.2	11670.8	216.35
614	623	623-17	2389.01	11.17	635.75	2.37	71.05	1.02	0	1.33	6398.7	6.37	49.82	111.27	527.39	937.53	1978.54	4.03	14.42	13.3	95.69	24.76	145.08	87.02	29.2	59.41	12.38	65.66	9.84	23.68	3.78	29.79	2.8	20.91	2.19	5631.47	1845.49	111
615	623	623-18	1413.44	0.99	101.56	0.39	7.17	2.39	2.08	0.76	7741.11	9.7	56.89	17.14	61.4	142.54	8961.06	3.92	7.38	4.47	27.48	4.04	22.91	12.34	4.04	8.52	1.62	8.56	1.27	3.12	0.48	3.92	0.39	5.98	0.28	2150.21	2275.3	10.75
616	623	623-19	12919.6	69.3	2285.68	10.98	379.15	2.52	0	4.52	3918.16	9.65	171.09	761.73	4752.3	4395.9	4949.23	6.71	39.3	76.08	601.1	148.63	843.34	521.15	166.06	361.08	75.31	411.47	62.42	150.9	23.31	179.33	16.01	116.62	6.85	24456.5	8148.75	264.7
619	623	623-22	13890.6	124.7	5786.29	28.56	302.34	16	8.23	27.18	8064.24	69.01	420.99	741.44	10225.8	12245.3	32349.9	35.17	198.25	103.6	823.47	180.96	1018.07	591.08	183.87	357.7	77.41	388.64	62.18	148.66	22.85	183.8	14.75	220.83	13.31	54455.2	11773.8	415.65
622	623	623-27	269.6	1.97	110.2	0.36	2.56	0.31	0	0.74	2629.85	2.15	9.32	16.19	54.45	256.3	2266.85	0.92	9.78	2.42	14.45	3.19	20.55	12.59	3.9	8.98	1.63	8.29	1.32	3.27	0.5	3.8	0.39	3.31	0.22	999.91	659.1	21.55
623	623	623-29	28956.8	43.19	5075.64	15.81	68.83	10.82	0	33.39	5548.74	107.93	679.87	515.7	7114.06	10848.5	154065	56.07	383.94	115.55	468.55	103.26	672.42	383.52	117.57	288.46	47.94	251.67	39.52	92.4	14.25	103.54	10.24	204.52	14.32	46267.4	4104.08	851
624	623	623-31	341.3	0.8	0	7.31	30.31	0.39	0	20.28	60.63	131.48	73.13	4.32	3.29	4.5	1116.78	2.7	283.56	4.53	15.74	2.82	15.59	5.98	1.65	2.99	0.49	1.89	0.27	0.56	0.09	1.12	0.18	0.74	0	234.44	522.64	4.52
625	623	623-32	11490	82.46	3496.42	16.07	285.05	1.52	0	6.49	2663.76	21.75	193.52	658.41	5379.59	6441	6583.25	16.66	46.14	78	762.03	179.47	984.13	593.96	193.77	328.37	73.26	369.14	59.25	140.3	21.64	180.49	13.27	116.27	8.06	20864.3	10516.9	484.74
626	623	623-33	11903.5	91.75	4593.5	19.58	232.64	4.12	0	13.91	3721.32	43.08	301.86	596.08	8710.53	9424.28	18114.8	24.39	111.62	87.4	738.28	172.73	999.26	585.86	178.51	337.9	74.17	365.75	55.61	130.12	20.45	167.67	12.74	170.73	12.9	27293.4	10571.6	937.59
627	623	623-34	10360.9	74.46	3201.95	15.12	231.32	2	0	8.31	2629.39	23.9	198.65	449.69	7262.4	6799.19	10001.6	14.45	59.21	61.35	588.85	139.33	749.85	444.82	148.77	245.86	54.02	274.8	42.18	98.62	15.52	129.12	9.41	121.19	9.31	17609.6	8051.27	681.09
628	623	623-35	14096.9	87.75	3616.32	15.99	485.57	1.83	0	6.51	3102.44	17	215.42	916.24	5751.2	6897.39	5814.03	12.88	44.38	84.55	772.76	180.95	1016.91	640.84	207.1	392.87	88.16	454.55	74.53	174.86	27.15	224.07	17.47	118.09	8.28	21211.7	11311.5	289.39
630	623	623-37	13048.1	115.21	3992.83	20.08	339.69	2.07	0	7.29	2220.83	21.11	259.56	952.66	5746.95	8748.46	8801.49	16.47	74.56	105.16	808.42	210.65	1177.39	796.59	241.54	498.83	110.43	583.89	86.38	195.74	31.23	236.73	19.89	139.41	12.32	24053.8	10408.3	472.94
631	623	623-38	11520.1	125.9	3259.36	19.36	267.09	4.17	0	10.96	3072.23	29.42	274.14	742.43	6493.14	8923.99	16446.2	17.72	109.23	95.42	686.22	172.3	990.79	652.54	198.2	404.02	85	442.53	66.54	153.53	24.01	190.54	15.69	148.77	11.89	28322	9939.46	587.84
632	623	623-40	69.6	0.14	8.52	0.04	0.22	0.04	0.08	0.09	189.33	0.25	1.6	1.07	2.76	7.06	615.77	0.15	0.86	0.31	1.28	0.26	1.44	0.75	0.22	0.48	0.09	0.44	0.07	0.17	0.03	0.21	0.02	0.33	0.01	116.39	386.18	0.56
633	623	623-41	8958.16	77.34	2843.71	17.17	224.89	1.82	0	5.78	2881.16	26.83	162.76	425.65	6201.02	5323.15	8419.58	19.92	40.6	70.07	627.29	152.43	825.91	529.08	177.29	296.7	63.07	330.96	46.45	104.99	17.63	146.48	11.01	122.61	8.46	20351.9	11616	820.44
634	623	623-42	12718.4	97.67	4507.3	25.4	298.19	2.36	0	6.7	3460.28	24.77	227.67	675.05	10073.9	8452.25	9097.29	19.6	60.72	107.36	953.01	224.76	1286.31	804.34	249.87	457.33	97.84	509.85	71.02	164.01	26.68	213.94	16.87	184.76	13.14	26623.2	12030	1197.85
635	623	623-43	11742.5	63.79	2833.08	11.88	404.77	3.36	0	5.51	4271.71	10.6	188.54	721.15	4286.29	4982.57	7484.4	7.71	54.4	75.74	607.32	154.82	879.08	554.6	181.38	371.11	78.53	421.59	63.22	150.33	23.42	183.6	15.9	112.95	7.66	24829	8486.65	222.03
636	623	623-44	12447.3	108.72	3985.48	19.49	319.05	1.08	0	6	3233.03	14.4	214.04	602.37	7919.12	5346.53	5855.65	12.14	37.88	93.95	879.35	215.94	1226.81	775.96	245.27	417.95	87.6	444.14	63.03	144.39	23.48	192.68	14.61	140.46	12.36	21467	12307.6	2276.02
637	626	626-1	12275.6	959.75	103.68	1.1	2925.58	2.16	0	5.51	1988.74	1.31	51.92	3985.36	246.29	2.27	80.61	0.05	47.39	167.68	1591.71	313.17	1594.69	1032.87	349.17	1274.32	237.71	1246.08	202.06	497.27	69.41	513.41	52.26	4.99	0.02	1283.92	230.22	2.93
639	626	626-3	11480.1	1041.58	131.81	1.15	2516.07	2.44	0	7.86	2072.8	2.53	30.88	4590.74	379.7	5.47	94.62	0.1	72.31	180.66	1494.11	312.86	1741.13	1213.93	391.21	1649.37	316.24	1601.11	244.01	584.14	85.11	622.37	64.15	6.94	0.03	1252.52	278.49	89.94
640	626	626-4	7889.38	686.44	141.33	1.49	2097.63	2.06	0	4.94	1929.23	1.04	25.45	3155.7	1652.19	8.52	70.75	0.03	45.96	156.9	1105.82	215.74	1183.84	832.18	275.1	1049.55	204.33	1022.09	169.18	404.66	54.68	392.69	41.05	14.47	0.03	861.91	262.71	8.89
641	626	626-5	11935.6	1001.84	136.48	0	2948.41	1.77	0	3.98	2369.09	1.34	40.54	4609.08	1616.72	9.21	66.66	0.04	37.86	175.6	1506.65	331.22	1810.83	1216.59	382.23	1692.64	304.02	1601.4	237.01	564.83	81	598.75	59.45	14.16	0.02	1341.18	258.07	21.03
642	626	626-7	12774.9	1237.59	63.21	1.11	2645.7	18.52	0	4.12	1587.42	1.52	44.36	4171.71	69.94	0.59	92.21	0.06	39.2	206.43	1924.83	378.65	1934.6	1141.25	437.41	1412.84	288.37	1510.87	234.55	572.34	89.89	686.98	62.82	4.44	0.02	1814.95	226.51	0.78
644	626	626-9	29486.8	2717.36	100.98	2.46	5548.94	5.74	0	18.84	2349.48	2.86	223.8	9788.55	183.02	0.8	83.76	0	189.73	471.31	3868.51	740.47	3849	2608.95	885.63	3139.8	623.64	3414.65	578.58	1431.08	203.69	1501.69	156	8.71	0.05	2929.88	267.35	0.97
645	626	626-10	20828.1	2288.82	132.93	1.9	4198.59	5.57	0	32.18	3713.41	10.58	57.48	7837.53	217.64	1.57	112.01	0.5	352.3	399.09	3539.58	650.71	3331.34	2133.4	763.79	2524.79	498.29	2704.04	443.89	1102.38	161.69	1238.9	117.65	8.33	0.04	2664.05	261.78	1.85
646	626	626-11	1827.99	479.86	49.66	0.94	489.01	1.99	0	12.61	728.55	2.7	6.12	906.99	234.02	1.26	17.26	0.15	117.41	51.05	386.06	71.04	401.29	263.41	94.01	309.09	66.6	334.35	54.21	130.28	18.3	141.14	13.45	2.58	0.01	334.91	247.86	1.73
647	626	626-12	3465.88	636.53	40.19	0.67	911.94	1.21	0	7.97	718.45	2.01	10.57	1638.6	220.61	1.35	82.26	0.09	88.93	81.21	649.68	122.25	642.47	442.94	158.87	516.27	108.31	566.25	97.94	237.98	34.9	267.2	28.03	3.43	0.01	745.27	210.73	0.69
648	626	626-13	7020.99	1238.23	147.93	1.49	1954.44	2.37	0	30.48	1322.72	8.98	28.15	3266.03	764.35	4.55	217.29	0.35	377.64	168.14	1425.2	281.32	1450.02	892.89	306.36	1077.86	210.38	1140.64	177.52	446.73	67.36	515.73	52.44	9.33	0.02	1810.93	336.05	1.48
650	626	626-15	1335.94	538.72	87.66	84.24	146.76	4.95	0	11.29	1605.46	18.98	29.31	294.46	9.03	0.43	60.23	0	54.42	22.44	165.25	33.12	171.33	109.69	33.49	124.57	24.85	132.38	19.01	52.2	7.98	52.89	5.41	0	0.32	62.62	147.6	2.95
652	626	626-17	4340.65	859.08	101.1	0.88	1131.74	1.69	0	11.33	1415.61	2.52	12.07	1942.13	357.26	1.92	147.97	0.13	124.83	116.29	1013.65	196.51	1016.21	621.78	202.99	703.66	134.03	723.69	111.74	279.54	40.39	312.36	29.84	5.33	0.01	1140.23	215.37	1.08
654	626	626-19	1492.33	144.44	8.65	2.13	60.2	6.95	3.59	3.65	392.66	0.61	1.34	178.45	5.63	0.05	34.2	0.05	28.99	12.22	71.81	16.87	90.29	53.3	18.33	63.13	12.45	65.31	10.52	25.16	3.71	28.81	3.03	0.16	0	61.21	220.94	0.77
655	626	626-20	32607	2353.53	185.67	2.34	5785.28	7.37	0	4.61	2487.53	2.86	80.97	11508.4	294.85	1.04	99.46	0	35.7	457.08	4441.69	891.41	4692.64	2854.92	958.24	3650.22	678.17	3788.89	581.8	1433.81	210.96	1520.55	155.32	8.42	0.04	2420.66	196.8	1.49
658	626	626-23	13464.5	1269.45	106.89	1.31	2948.82	3.08	0	7.3	1191.24	2.04	29.86	5267.07	916.74	3.79	109.64	0.1	79.95	216.06	2118.75	413.97	2183.76	1261.77	447.34	1575.69	304.99	1600.78	254.99	633.67	93.69	707.99	70.29	9.84	0.03	2037.73	180.09	0.52
659	626	626-24	15731.9	1975.05	145.88	1.71	3272.04	5.29	0	8.88	1803.58	4.96	32.56	7198.16	397.87	1.68	116.18	0.19	77.65	474.11	3155.5	561.57	2787.98	1913.85	650.03	2271.39	455.61	2466.38	389.59	967.98	138	1023.99	101.8	6.5	0.03	1633.85	232.08	9.35
660	626	626-25	24481.4	2750.64	163.93	2.45	5454.29	4.67	0	11.19	1976.5	5.22	59.05	8122.78	663.18	4.04	144.76	0.16	121.76	377.6	3618	685.17	3439.05	2039.2	736.3	2665.29	514.77	2772.93	415.17	1032.7	156.43	1185.63	114.83	12.14	0.05	2956.73	492.01	5.25
661	662	662-1	64387.4	0.75	3.71	6.12	0.19	3.07	6.49	15.61	NA	0.76	8.6	3.13	7.11	0.14	51.08	0.02	159.1	3.33	2.87	0.53	2.81	1.98	1.35	1.27	4	4.55	0.43	0.55	0.05	0.25	0.03	0.08	0.01	0.24	7.48	1.01
662	662	662-2	77123.4	1.36	55	2.46	0.91	6.4	22.87	4.72	NA	0.61	11.05	9.31	54.66	0.88	49.66	0.11	53.58	4.47	3.22	0.77	4.22	2.86	2.06	2.2	6.92	9.97	0.97	1.62	0.16	1.21	0.1	0.65	0	0.4	6.04	4.53
663	662	662-3	76837.5	8.1	724.68	4.83	41.57	125.59	365.24	4.75	NA	0.92	13.75	28.31	198.49	6.23	145.1	0.37	51.1	13.47	22.01	3.03	13.54	8.24	5.75	6.45	17.23	31.26	3.04	5.65	0.71	4.93	0.39	3.28	0.09	0.63	0.49	7.59
665	662	662-5	26100.9	31.23	67.46	5.35	78.51	171.68	363.29	73.52	NA	0.98	68.28	86.92	372.57	1.55	1213.46	0.03	855.97	24.17	90.04	14.46	75.61	51.15	35.19	38.9	86.77	197.13	19.69	34.39	4.36	30.16	1.89	4.53	0.01	3.57	31.74	143.17
666	662	662-6	2372.81	17.52	42.06	0.23	40.01	0.97	0.28	7.47	NA	0.1	24.77	67.54	22.23	0.55	615.87	0.02	89.03	6.01	22.73	6.69	47.75	29.05	18.22	19.39	50.63	91.94	9.51	15.78	1.85	11.9	0.85	0.31	0	0.55	4.5	8.51
667	662	662-7	9226.79	75.32	134.63	0.92	142.22	2.69	1.51	48.83	NA	0.08	73.52	335.31	91.93	2.12	1476.58	0.04	532.46	18.72	85.13	30.23	231.93	135.15	79.8	85.18	231.09	398.58	41.24	69.1	7.66	47.83	3.7	1.45	0.03	1.55	19.65	178.36
668	662	662-8	12821.7	194.18	158.25	1.55	210.28	2.98	2.52	12.43	NA	0.14	99.37	595.79	84.54	6.11	749.75	0.07	130.39	28.41	146.36	55.57	414.84	227.27	135.86	136.54	377.07	642.54	68.43	117	13.22	82.65	6.62	1.49	0.09	5.91	27.82	343.99
669	662	662-9	7947.47	93.83	177.48	2.44	137.33	4.38	10.57	25	NA	0.37	70.85	323.18	76.37	2.92	1392.92	0.12	284.93	21.12	93.35	34.47	254.2	139.55	82.34	81.92	225.26	379.3	39.85	67.82	7.86	50.06	3.82	1.25	0.02	2.16	14.08	96.41
670	662	662-10	78953	0.94	1.03	1.35	0.15	4.23	5.52	2.22	NA	0.57	5.96	13.16	8.31	0.23	67.89	0.03	22.12	5.04	4.89	1.4	9.18	6.66	4.68	4.43	15	16.82	1.47	1.88	0.17	0.96	0.07	0.15	0.01	0.13	1.3	1.66
671	662	662-11	78388.4	9.57	28.54	14.19	37.02	1101.4	4615.38	2.01	NA	0.35	3.47	8.87	36.58	0.35	77.39	0.06	2.28	2.6	3.32	0.56	3.35	2.74	2.13	2.45	6.94	11.62	1.17	2.2	0.25	1.85	0.16	0.99	0.01	19.59	0.23	1.6
672	662	662-12	85921.4	3.22	6.43	2.57	4.96	226.25	993.45	0.56	NA	0.29	1.74	6.13	21.9	0.11	23.2	0.03	2.86	2.47	1.96	0.44	2.45	2.02	1.43	1.66	4.95	7.38	0.75	1.23	0.15	1.01	0.1	0.55	0.01	0.08	0.62	1.67
673	662	662-13	79539.1	22.53	26.44	4.32	336	571.29	1459.67	2.13	NA	0.34	4.81	26.03	132.03	1.44	226.82	0.02	13.29	7.1	9.59	1.44	7.63	5.94	4.58	6.28	16.65	31.43	3.45	6.62	0.89	5.77	0.54	3.36	0.01	0.34	0.27	2.25
675	662	662-15	1979.72	2.69	15.85	2.48	2.52	88.78	197.6	0.99	NA	0.03	1	4.47	15	0.2	16.92	0	10.34	1.04	3.3	0.56	3.07	2.24	1.61	1.79	4.46	8.52	0.87	1.49	0.18	1.26	0.08	0.29	0	0.11	0.66	9.66
676	662	662-16	5238.76	14.16	8.83	0.61	40.92	3.63	1.13	22.37	NA	0.7	212.09	74.49	35.59	0.22	347.52	0.02	261.9	10.95	33.49	6.79	45.49	34.64	22.39	25.64	59.35	129.2	13.06	22.1	2.62	18.9	1.12	0.71	0	0.36	8.96	7.7
677	662	662-17	8133.3	88.71	42.67	1.05	129.49	0.98	1.32	7.36	NA	0.07	72.18	334.74	74.37	2.15	245.26	0.03	85.95	17.61	86.88	32.72	255.31	145.51	84.53	89.97	245.72	418.52	44.17	74.28	8.44	52.32	4.08	1.27	0.04	1.97	18.8	236.14
678	662	662-18	9419.76	175.37	91.45	1.07	141.21	1.47	2.11	24.21	NA	0.11	83.73	483.95	117.05	5.61	379.65	0.05	273.46	25.54	117.23	46.38	351.32	193.54	114.2	119	325.08	551.87	58.12	100.26	11.32	71.33	5.81	2.17	0.07	5.73	25.74	325.27
679	662	662-19	77823.8	0.88	3.94	5.05	0.43	3.14	1.15	7.59	NA	0.63	8.14	4.43	8.59	0.19	32.58	0.03	78.66	2.65	2.63	0.67	4.01	2.93	2.04	2.01	6.36	7.31	0.64	0.75	0.06	0.35	0.03	0.14	0.01	0.26	2.68	1.07
680	662	662-20	86793.3	4.4	19.57	0.73	0.2	13.81	24.96	3.05	NA	0.21	6.89	17.98	38.03	0.44	43.33	0.04	32.32	9	5.76	1.42	6.57	3.81	2.74	3.33	9.73	15.77	1.54	2.62	0.32	2.18	0.17	0.59	0.01	0.4	0.51	2.44
681	662	662-21	84063.1	13.87	41.81	18.51	76.33	1052.06	4196.84	4.34	NA	0.94	12.36	47.66	44.56	0.77	248.14	0.11	31.46	21.24	18.03	3.7	16.59	10.06	7.34	9.16	25.33	45.71	4.81	8.95	1.12	7.65	0.69	1.44	0.01	0.2	0.27	3.99
682	662	662-22	60613.8	4.11	5.39	3.32	8.92	200.27	881.94	2.03	NA	0.52	6.77	21.61	15.2	0.12	94.61	0.04	19.85	11.02	8.16	1.81	7.76	4.68	3.24	4.01	11.5	19.75	2	3.53	0.44	2.94	0.29	0.53	0	0.05	0.17	1.01
683	662	662-23	26529.7	24.7	36.03	33.92	89.47	2116.81	6799.1	357.73	NA	1.74	100.61	45.02	120.31	0.78	128.4	0.08	4503.58	16.03	37.61	6.54	33.66	23.47	16.42	17.59	46.3	87.32	8.88	15.81	1.92	13.29	0.95	1.74	0.01	0.68	28.05	136.85
684	662	662-24	13229.1	25.09	10.18	0.98	319.7	1.85	2.15	8.45	NA	0.1	115.22	228.23	13.04	0.49	204.61	0.05	97.2	6.79	20.9	9.21	84.56	63.91	39.88	53.76	139.2	267.19	28.64	49.31	5.31	31.6	2.49	0.36	0.01	0.69	9.76	9.89
685	662	662-25	7861.71	48.77	27.75	1.4	149.29	1.44	2.64	30.87	NA	0.17	71.15	242.63	58.81	1.04	366.1	0.02	382.9	12.52	60.53	23.3	184.23	104.35	60.56	67.39	182.64	312.24	32.37	54.43	6.02	37.04	2.93	0.89	0.02	0.8	10.33	43.76
686	662	662-26	12593	117.42	65.45	1.02	243.36	1.52	2.27	31.51	NA	0.11	117.38	473.73	88.7	2.65	1834.1	0.05	367.24	22.12	99.3	38.9	311.62	185.32	109.49	120.12	329.04	567.92	59.06	100.01	11.29	69.31	5.52	1.52	0.04	2.42	66.38	335.12
690	662	662-30	82948.2	21.46	135.31	23.83	95.49	2330.06	10674.7	6.97	NA	1.21	8.76	24.45	68.24	1.21	136.41	0.29	20.65	8.2	8.42	1.52	7.39	4.85	3.67	4.85	12.88	24.64	2.78	5.27	0.69	4.71	0.41	2.34	0.02	0.21	0.29	2.92
691	662	662-31	84098.9	8.44	84.12	4.58	33.56	100.21	258.26	3.57	NA	0.45	10.49	21.2	143.16	1.27	79.3	0.03	39.37	10.86	9.4	2.01	8.9	5.22	3.6	4.31	12.28	21.34	2.2	3.94	0.47	3.13	0.27	2.09	0.01	0.24	0.22	4.34
692	662	662-32	81390.1	0.88	1.2	0.64	0.19	4.05	1.43	0.54	NA	0.28	0.87	12.01	14.62	0.19	48.04	0.03	6.07	4.3	4.41	1.36	8.79	6.5	4.36	4.44	14.98	17.03	1.46	1.96	0.15	0.81	0.06	0.22	0.02	0.09	0.72	1.52
693	662	662-33	83741.5	6.94	200.06	3.42	13.63	369.3	1598.88	6.51	NA	0.96	15.18	23.25	18.92	1.36	81.88	0.24	72.01	13.92	12.32	2.57	11.06	6.02	4.28	5	13.53	24.76	2.42	4.26	0.51	3.64	0.3	0.77	0.03	0.17	2.9	12.52
695	662	662-35	50429.3	55.07	421.83	47.34	183.7	6364.02	27778.3	38.14	NA	2.48	11.41	50.67	139.93	2.77	218.92	0.29	284.67	12.4	43.15	5.45	28.57	19.08	13.63	15.65	39.28	77.97	8.46	15.64	2	13.14	1.05	3.82	0.03	1.12	4.95	195.2
696	662	662-36	41588.4	54	41.35	3.03	13.68	104.11	372.64	54.26	NA	0.34	15.54	65.19	289.46	1.09	170.1	0.02	678.51	15.56	90.43	10.29	53.41	38.8	30.99	35.4	93.08	158.46	14.96	25.25	2.99	19.55	1.3	3.7	0.03	2.25	10.36	401.28
697	662	662-37	56418.5	56.35	154.57	38.55	187.53	4546.93	20901.8	17.24	NA	1.85	7.37	52.54	250.45	1.99	206.96	0.12	77.57	13.69	69.24	6.76	34.23	24.48	18.26	21.49	53.73	102.48	10.18	18.12	2.3	15.51	1.08	4.8	0.02	1.57	4.77	313.91
698	662	662-38	82490.8	43.88	131.11	43.64	299.03	5936.29	27059.6	12.96	NA	1.74	10.84	62.4	126.28	1.81	361.22	0.18	44.55	22.81	22	4.3	19.3	12.47	9.43	12.37	33.12	63.68	6.87	13.29	1.75	11.55	1.05	5.07	0.02	0.5	0.66	12.2
699	662	662-39	84763.5	5.22	100.7	3.8	17.5	308.26	1395.25	2.42	NA	0.27	4.45	14.57	17.01	0.69	114.12	0.05	21.1	7.09	6.94	1.17	5.28	3.21	2.39	2.88	8.06	14	1.42	2.5	0.33	2.1	0.2	0.57	0.02	0.12	0.38	1.46
702	809	809-3	6661.01	76.25	3709.07	14.49	40.6	2.71	2.61	54.45	NA	43.45	174.28	245.09	1779.2	2824.18	NA	43.15	277.26	58.9	276.3	70.26	403.71	227.67	67.82	24.52	132.04	128.68	19.08	48.76	8.05	71.86	6.99	101.6	18.07	NA	24881.2	3573.18
703	809	809-4	2923.13	25.39	1941.76	7.87	12.57	0.47	0.93	29.61	NA	15.5	86.13	111.75	935.67	1501.54	NA	17.84	164.95	25.79	123.21	32.12	190.72	111.28	33.28	11.92	64.34	61.69	9.17	22.31	3.49	27.73	2.62	50.75	9.27	NA	10850.4	1614.35
704	809	809-5	19911.6	26.15	132.04	2.18	11.51	0.61	1.39	184.38	NA	40.95	74.98	159.02	120.84	132.43	NA	5.49	1098.03	14.58	110.08	36.84	244.88	289.07	106.11	36.29	184.37	150.13	16.04	28.19	3.03	17.39	1.31	5.49	0.32	NA	2100.09	193.74
710	809	809-12	9741.37	143.32	6619.76	27.57	30.35	0.63	1.58	26.27	NA	43.27	263.4	345.25	6938.07	8721.63	NA	44.8	124.69	93.99	481.84	124.06	755.17	428.95	122.95	42.57	234.26	220.52	32.02	77.42	11.67	86.61	7.81	166.18	14.82	NA	4437.14	608.52
711	809	809-13	11606.7	151.95	6761.9	28.34	44.79	0.47	1.17	31.16	NA	51.61	300.98	404.91	7791.26	9598.49	NA	50.19	154.47	90.3	455.21	118.33	715.26	417.78	123.49	44.38	244.16	229.57	34.53	83.78	12.55	93.21	8.79	193.88	14.13	NA	13707.5	716.44
712	809	809-14	10470.4	74.36	2560.4	9.83	398.32	2.02	1.11	4.99	NA	19.08	115.19	761.25	3233.8	3938.44	NA	25.68	22.83	45.14	380.81	98.24	615.32	415.48	131.94	62.31	293.02	346.34	53.67	131.99	19.8	156.47	13.94	82.85	7.57	NA	12443.4	187.21
713	809	809-15	10920.6	78.01	2302.83	8.67	353.91	2.28	1.35	4.4	NA	11.88	111.33	781.15	2309.78	3773.41	NA	16.58	19.26	40.37	331.28	92.3	582.78	407.25	130.1	63.33	299.84	358.24	55.41	136.84	20.53	160.25	14.91	65.88	7.66	NA	10410.7	184.9
714	809	809-16	6761.07	59.46	1555.67	6.32	193.92	1.06	0.92	2.84	NA	10.14	73.24	476.29	1496.49	2197.46	NA	17.35	12.5	26.92	214.65	59.88	369.33	256.49	82.85	38.65	181.98	217.16	33.63	81.88	12.25	94.86	8.77	45.86	4.2	NA	6863.84	193.53
715	809	809-17	7590.12	53.92	2869.47	5.89	153.87	3.3	1.65	13.39	NA	37.66	201.88	384.56	1761.37	3313.66	NA	28.8	66.47	52.14	339.87	89.37	549.81	349.35	107.12	44.97	220.77	236.13	34.8	84.66	13.07	103.23	9.62	88.94	10.57	NA	51185.5	915
719	809	809-21	8998.08	58.84	4257.71	10.44	221.52	2.98	2.22	22.22	NA	77.11	245.13	385.13	2353.76	3249.32	NA	69.9	108.58	58.9	395.69	107.28	646.17	405.09	126.41	47.86	242.17	246.51	35.46	84.71	13.18	106.05	9.76	119.99	15.75	NA	24374.4	1227.69
720	809	809-22	9526.96	72.9	4270.22	11.58	306.58	1.97	1.63	12.87	NA	31.97	203.15	463.6	3424.84	3883.04	NA	33.56	67.06	48.86	372.48	106.51	647.09	431.64	137.42	53.13	264.64	283.27	41.09	99.59	15.49	125.44	10.99	112.54	11.57	NA	20304.4	991.31
721	809	809-23	5510.35	34.32	3012.72	7.91	151.35	1.34	0.77	8.94	NA	23.91	129.72	245.88	1490.2	2330.28	NA	23.08	45.59	39.22	289.82	74.05	451.79	286.37	90.83	32.72	165.97	165.46	23.57	55.64	8.59	67.76	5.89	77.1	11.61	NA	10922.8	795.34
722	809	809-24	8433.47	53.34	3378.68	9.04	223.62	3.4	2.17	22.02	NA	95.91	228.19	373.37	1673.28	2525.16	NA	62.33	112.22	55.14	357.33	96.77	587.56	370.36	114.65	44.57	225.03	231.67	33.91	81.88	12.76	104.47	9.84	95.11	13.13	NA	27012.4	1110.38
724	809	809-26	13050.4	80.61	2723.63	10.53	363.08	2.4	1.57	6.57	NA	12.07	151.79	842.32	2456.38	4062.2	NA	21.73	32.55	49.84	396.71	101.56	619.47	419.27	126.99	66.58	309.13	381.89	60.33	149.08	22.69	174.71	15.81	73.53	8.52	NA	13993	305.59
725	809	809-27	7368.57	44.86	2709.29	7.05	239.56	1.2	0.75	29.27	NA	17.88	142.79	279.74	1675.41	1724.62	NA	24.28	163.66	35.91	300.67	70.03	426.3	282.1	88.55	30.17	157.37	154.07	22.19	53.38	8.3	66.17	5.85	70.55	9.75	NA	10073.8	1307.97
726	809	809-28	7318.54	54.25	4669.39	10.43	34.84	2.68	1.39	180.32	NA	55.58	258.62	192.76	1684.87	2342.07	NA	70.19	1026.66	61.23	309.72	74.9	412.97	233.41	66.84	22.3	116.86	112.99	15.96	39.9	6.77	64.57	5.96	94.43	15.65	NA	84797.6	1084.47
727	809	809-29	428.82	3.51	140.69	0.49	1.48	0.12	0.08	9.97	NA	3.13	13.83	12.12	84.14	103.89	NA	2.96	53.27	3.77	16.6	4.24	22.97	11.92	3.39	1.15	6.28	5.88	0.88	2.27	0.4	4.05	0.4	3.9	0.66	NA	1966.84	65.01
729	809	809-31	12750.3	95.47	4174.47	12.06	547.76	2.64	1.58	5.69	NA	20.75	164.22	909.97	3702.68	4621.3	NA	41.29	26.21	57.72	481.24	121.09	753.88	510.46	152.9	76.99	355.5	429.28	67.21	164	25.07	196.99	17.62	96.91	11.54	NA	14761.5	720.19
731	809	809-33	3158.98	16.37	841.56	2.29	19.35	2.83	3.59	114.4	NA	60.11	214.48	97.72	283.52	418.48	NA	29.72	644.97	31.53	120.34	25.59	135.96	80.35	25.23	9.95	47.52	54.68	7.77	19.82	3.51	33.76	3.14	21.51	1.66	NA	33281.6	154.25
732	809	809-34	8762.23	108.41	5682.82	19.31	204.25	1.31	1.17	14.74	NA	36.49	193.24	428.72	6486.99	5036.99	NA	57.66	77.67	55.33	472.71	117.61	693.41	470.15	151.18	52.98	258.4	274.98	38.21	90.36	14.42	118.44	9.48	147.85	13.27	NA	21318.6	1784.56
733	809	809-35	12671.6	109.3	3911.89	13.36	503.73	2.48	1.57	5.95	NA	20.24	184.2	978.16	3033.14	4279.51	NA	27.8	29.08	66.66	542	130.4	783.9	518.26	163.99	76.93	363.76	438.97	68.23	167.98	25.6	205.36	17.44	87.56	8.13	NA	16670	572.17
734	809	809-36	7497.21	85.77	4144.94	14.84	251.4	1.93	1.28	5.88	NA	29.68	105.58	382.84	4212.92	3923.32	NA	47.39	28	43.33	389.88	98.6	581.08	383.6	123.4	45.64	219.76	238.65	33.96	81.55	12.77	103.92	8.88	105.06	10.52	NA	19802.5	1266.08
736	809	809-39	8161.89	98.38	4951.78	17.14	266.94	1.68	1.46	7.68	NA	33.14	133.02	420.34	5437.44	4483.24	NA	52.05	38.74	51.43	441.69	114.74	668.95	441.57	142.15	50.95	250.64	262.51	37.25	88.13	13.93	116.77	9.5	125.54	10.19	NA	18850.5	1186.42
737	809	809-39A	11549.6	91.56	3346.08	12.72	432.38	2.3	1.46	5.84	NA	20.66	179.19	834.28	2765.44	4044.26	NA	27.73	28.88	58.93	477.38	115.56	690.07	457.35	140.66	66.9	314.6	379.85	59.32	146.72	22.25	177.7	15.16	84.83	7.25	NA	15314.9	496.73
738	809	809-40	8869.44	46.14	1770.38	5.24	319.98	1.77	1.23	2.82	NA	4.49	88.1	631.66	2039.76	2424.55	NA	7.33	12.76	28.57	226.02	62.69	396.14	275.47	83.39	45.64	216.3	262.93	42.48	107.1	16.18	125.19	11.81	46.87	4.46	NA	5580.72	139.4
739	809	809-41	9012.38	51.41	3851.54	9.71	204.86	1.16	1.71	10.12	NA	58.96	208.59	409.1	1948.58	3714.98	NA	67.91	50.27	60.47	428.1	105.63	625.13	377.82	125.78	47.85	232.9	250.35	37.37	89.74	14.09	112.2	10.12	122.24	10.26	NA	15781.3	642.07
740	809	809-42	9762.82	76.52	2714.37	8.9	375.43	1.8	1.11	7.31	NA	14.68	158.74	718.58	2707.11	3101.53	NA	18.93	40.13	47.41	406.8	97.24	596.15	402.78	121.62	58.46	273.92	334.1	51.86	125.79	19.38	152.41	13.38	72.6	6.11	NA	14031	800.08
741	809	809-43	13450.7	91.53	3508.72	10.65	508.26	2.43	1.59	8.45	NA	16.79	190.61	867.39	3684.28	3631.88	NA	21.5	44.11	63.16	574.23	134.55	816.19	549.74	176.82	76.3	363.23	419.75	63.86	154.01	23.45	184.59	16.37	94.61	10.58	NA	13017.6	1254.14
742	809	809-44	6282.22	30.19	3837.48	9.66	54.97	0.55	1.39	63.99	NA	52.73	189.11	194.67	1275.63	2561.05	NA	58.54	369.53	47.23	264.24	69.59	413.92	252.86	84.29	24.91	131.75	126.84	18.09	43.38	6.86	54.96	4.88	80.34	12.11	NA	10803.9	1119.32
743	809	809-45	4988.61	57.09	4731.33	13.1	44.02	0.36	1.04	56.56	NA	34.25	159.87	137.5	3182.59	3774.4	NA	45.24	321.85	49.08	265.89	64.81	372.09	212.27	61.51	19.74	102.06	98.27	13.62	32.28	4.96	38.82	3.2	99.36	7.93	NA	13261.7	866.13
746	809	809-48	9662.76	73.27	5525.45	16.56	44.45	0.57	1.4	69.69	NA	44.82	265.15	299.25	5585.82	8149.71	NA	50.75	395.3	92.36	486.3	112.45	652.44	363.22	107.38	36.1	193.85	187.5	27.06	64.77	9.74	73.09	6.28	146.8	13.93	NA	19807.8	445.01
748	809	809-50	14201.1	55.83	4677.56	10.83	541.62	2.67	1.54	10.37	NA	24.9	250.67	540.89	2551.13	2926.39	NA	34.88	54.14	60.24	507.97	124.12	777.74	514.55	176.73	57.77	297.52	294.81	41.85	99.96	15.54	126.01	10.82	123.8	14.02	NA	8103.6	1820.02
749	809	809-51	12400.1	89.4	6214	20.73	347.49	2.58	1.65	9.96	NA	25.7	230.55	573.99	6175.59	5222.8	NA	41.47	49.29	78.38	695.57	167.62	997.21	650.61	221.43	79.44	373.22	404.08	55.24	128.87	20.45	170.98	13.53	157.49	13.02	NA	17227.5	1500.49
750	809	809-52	9669.9	69.46	4630.47	14.19	291.46	1.81	1.5	8.25	NA	22.4	180.87	471.42	3450.65	3744.91	NA	33.34	42.35	59.81	527.79	130.23	782.04	505.89	170.91	63.08	300.48	325.6	44.52	104.68	16.37	136.53	10.89	102	9.41	NA	13570.5	935.54
751	809	809-53	9569.84	64.46	4640.89	13.41	300.49	2.22	1.48	9.9	NA	44.35	179.19	462.7	3680.75	3918.39	NA	53.82	52.42	60.71	521.76	130.18	776.35	500.04	168.07	62.13	298.55	326.28	44.41	104.12	16.22	136.79	11.14	112.37	10.28	NA	16735.6	964.36
752	809	809-54	9741.37	65.82	5489.75	15.23	297.03	2.02	2.17	11.01	NA	54.59	206.35	462.31	4258.23	4264.93	NA	61.12	58.31	66.1	541.87	133.21	807.67	515.1	170.8	64.33	310.99	333.93	45.48	105.85	16.52	137.18	11.18	126.64	11.3	NA	16788.5	1324.66
753	809	809-55	2158.4	15.88	878.85	2.38	76.23	0.14	0.62	1.32	NA	3.67	30.89	111.74	916.4	770.36	NA	4.86	6.58	12.9	109.46	28.62	171.55	112.54	36.52	14.42	67.56	75.51	10.4	24.36	3.83	30.57	2.59	21.81	1.73	NA	2594.04	219.82
754	809	809-56	8890.88	59.89	4616.11	11.47	284.02	0.94	2.33	9.81	NA	41.75	161.92	423.54	3992.6	3828.22	NA	45.06	51.18	56.99	437.54	119.66	726.6	461.91	151.18	59.16	284.06	305.97	42.22	98.34	15.42	125.88	10.55	115.98	8.12	NA	15767.4	878.05
755	809	809-57	10770.5	71.46	4364.95	10.91	354.13	0.64	2.56	6.02	NA	13.82	160.96	520.28	3787.87	3365.16	NA	22.74	29.58	58.76	494.27	133.26	793.27	515.2	168.2	66.81	315.55	346.57	47.56	112.36	17.58	139.86	12.02	105.95	8.54	NA	11691.2	1264.74
756	809	809-58	9369.73	54.58	4177.94	11.21	264.67	1.39	1.56	7.51	NA	25.71	177.63	373.47	2827.68	2934.73	NA	36.23	37.85	55.43	443.01	109.4	656.1	409.04	136.08	48.76	240.88	252.52	34.46	81.03	12.79	102.25	8.57	98.12	9.35	NA	9531.69	1075.08
757	809	809-59	4366.82	17.12	2016.32	3.5	91.91	0.95	1.33	10.72	NA	35.1	136.9	161.68	861.01	1426.06	NA	31.04	51.09	23.43	160.82	40.69	246.18	151.2	49.85	18.7	93.18	96.44	13.64	32.66	5.14	41.88	3.76	42.26	3.88	NA	5007.75	257.77
759	809	809-61	2501.45	6.17	263.27	3.09	20.93	1.27	11.67	43.4	NA	488.58	90.68	53.72	118.74	143.18	NA	20.08	142	6.21	26.16	5.74	36.87	20.7	7.8	3.23	17.04	17.73	3	8.04	1.21	10.24	1.15	7.26	0.42	NA	14393.6	55.73
760	809	809-62	2601.51	9.17	786.14	2.77	38.27	1.67	8.3	104	NA	242.62	128.96	105.23	367.08	519.85	NA	60.14	415.36	19.65	78.29	18.42	115.04	67.9	22.79	9.18	47.1	49.57	7.5	19.15	3.4	33.27	3.46	27.24	1.89	NA	20467	150.53
761	809	809-63	1779.61	6.59	758.84	2.4	23.55	0.78	2.3	12.05	NA	104.43	57.39	67.98	307.17	449.16	NA	37.14	39.38	10.89	59.38	13.5	81.65	46.5	15.65	5.99	31.38	31.8	4.76	11.93	1.95	16.32	1.67	18.42	1.5	NA	5546.12	140.31
762	1232	1232-4	36857.1	0.13	1.72	0.6	2855.98	0.88	0.12	4.72	NA	0.05	210.33	1.89	0.25	2.41	5.98	0.01	29.32	56.4	7.18	0.39	1.16	0.19	0.07	0.05	0.23	0.38	0.09	0.27	0.04	0.29	0.04	0.31	0	145.16	48.87	0.16
763	1232	1232-6	33498	0.15	0.94	0.34	1021.63	4.26	0.06	1.65	NA	0.02	76.2	3.01	0.14	0.89	3.58	0	9.65	20.03	3.11	0.22	0.88	0.21	0.05	0.07	0.34	0.53	0.13	0.37	0.05	0.33	0.05	0.09	0	40.87	26.05	0.35
764	1232	1232-7	32047.2	0.1	28.54	0.68	5251.47	0.88	0.23	13.45	NA	0.1	271.4	1.55	0.87	9.16	24.99	0.02	86.13	153.32	17.27	0.53	1.14	0.09	0.04	0.02	0.1	0.12	0.03	0.09	0.01	0.08	0.01	0.56	0	253.16	10176.7	0.3
765	1232	1232-8	35291.9	0.1	4.89	0.4	602.56	0.94	0.04	0.49	NA	0.01	34.1	0.22	0.05	0.64	1.4	0	3.11	7.72	1.09	0.05	0.13	0.02	0.01	0	0.02	0.03	0.01	0.02	0	0.02	0	0.02	0	10.71	11.7	0.02
766	1232	1232-10	29538.6	0.06	11.19	0.2	2585.2	0.71	0.09	3.66	NA	0.03	140.17	1.31	0.21	3.27	8.25	0.01	23.42	60.47	8.37	0.36	0.94	0.12	0.05	0.03	0.14	0.23	0.06	0.16	0.03	0.18	0.03	0.23	0	105.1	20.8	0.12
769	1232	1232-25	188359	0.63	0.38	1.63	1796.19	54.78	0.21	0.9	NA	0.01	183.25	4.13	0.07	0.51	12.36	0	6.74	18.39	3.02	0.28	1.11	0.23	0.07	0.08	0.41	0.66	0.17	0.48	0.07	0.44	0.07	0.11	0	42.33	34.69	0.04
772	1232	1232-31	63351.1	0.36	0.29	0.75	2407.92	3.68	0.13	1.66	NA	0.02	113.89	1.85	0.33	0.81	4.63	0	11.96	24.54	2.72	0.18	0.59	0.11	0.04	0.03	0.16	0.24	0.06	0.17	0.03	0.17	0.03	0.16	0	67.06	56.64	0.09
773	1232	1232-37	32032.9	0.1	17.45	0.85	4814.74	0.79	0.18	4.98	NA	0.09	192.32	2.96	0.78	6.33	12.12	0.01	31.55	116.63	16.04	0.66	1.73	0.22	0.11	0.06	0.29	0.43	0.11	0.32	0.04	0.31	0.05	0.49	0	217.56	59.87	0.25
775	1232	1232-39	35813.7	0.13	4.81	0.8	4682.74	1.07	0.15	9.06	NA	0.1	186.28	2.83	0.4	4.57	6.92	0.01	59.79	110.27	14.5	0.68	1.93	0.23	0.09	0.06	0.32	0.45	0.12	0.32	0.05	0.32	0.05	0.49	0	217.27	63.28	0.26
776	1232	1232-40	34598.7	0.1	4.82	0.67	5929.66	0.9	0.19	22.85	NA	0.09	229.91	1.95	0.69	6.69	23.3	0.01	148.77	110.99	12.98	0.49	1.25	0.13	0.05	0.03	0.17	0.23	0.06	0.17	0.03	0.17	0.03	0.59	0	257.65	96.19	0.31
777	1232	1232-42	29402.8	0.1	2.57	0.68	4365.25	0.84	0.17	3.81	NA	0.07	167.94	2.98	0.48	4.22	14.16	0.01	29.22	97.5	10.63	0.53	1.63	0.2	0.13	0.05	0.27	0.33	0.09	0.27	0.04	0.25	0.04	0.46	0	187.17	60.71	0.25
779	1232	1232-44	286374	1.57	75.71	6.19	39231.2	7.13	1.58	38.81	NA	0.69	1596.45	16.88	7.27	40.45	101.49	0.1	305.96	658.61	72.41	3.51	10.04	1.56	0.64	0.42	1.74	2.49	0.57	1.8	0.24	1.84	0.21	4.23	0.01	1682.12	714.69	2.71
781	1232	1232-46	34470	0.12	20.88	1.14	5590.17	1.1	0.24	6.61	NA	0.1	225.03	3.55	0.86	7.56	19.18	0.01	51.06	130.02	15.13	0.71	2.05	0.31	0.09	0.06	0.34	0.44	0.12	0.34	0.05	0.3	0.05	0.6	0	224.21	99.41	0.31
782	1232	1232-47	31739.9	0.07	0.39	0.59	2940.4	0.55	0.12	2.75	NA	0.05	130.7	1.57	0.22	2.12	7.37	0	21.1	49.42	5.49	0.26	0.82	0.11	0.04	0.02	0.13	0.17	0.05	0.14	0.02	0.13	0.02	0.28	0	110.11	44.61	0.14
783	1232	1232-48	33898.3	0.1	2.19	1.11	5539.1	0.9	0.2	6.34	NA	0.08	226.08	3.31	0.66	4.91	13.75	0.01	45.87	83.8	9.2	0.51	1.41	0.19	0.08	0.05	0.26	0.36	0.1	0.28	0.04	0.26	0.04	0.56	0	236.51	108.06	0.3
785	1232	1232-50	32597.5	0.09	1.91	0.46	3976.65	5.96	0.12	5.05	NA	0.07	146.33	1.96	0.8	3.55	11.33	0.01	36.93	60.05	7.32	0.35	1.04	0.15	0.06	0.03	0.17	0.23	0.06	0.17	0.02	0.19	0.03	0.42	0	158.86	84.35	0.7
787	1232	1232-52	201860	1.03	0.43	1.99	9088.06	1.39	0.35	12.36	NA	0.07	435.94	2.07	2.39	1.65	16.08	0	91.83	52.66	5.25	0.32	1.03	0.14	0.06	0.03	0.16	0.19	0.05	0.16	0.02	0.13	0.02	0.92	0	370.1	120.75	0.66
788	1232	1232-53	32147.2	0.16	0.44	0.53	1794.45	0.36	0.07	2.56	NA	0.02	89.69	2.04	0.56	0.38	8.88	0	19.16	20.88	3.43	0.29	1.03	0.18	0.07	0.04	0.23	0.32	0.08	0.23	0.03	0.19	0.03	0.18	0	71.83	38.56	0.48
789	1232	1232-58	31446.8	0.09	3.87	0.84	5198.77	0.88	0.21	6.97	NA	0.06	182.1	2.86	0.46	5.22	20.57	0.01	45.73	95.99	11.67	0.53	1.55	0.2	0.07	0.05	0.28	0.36	0.1	0.27	0.04	0.24	0.04	0.53	0	239.07	61.92	0.24
793	1237	1237-2	10270.2	1.93	126.93	2.82	105.87	66.37	55.2	2.32	NA	1.82	89.1	34.44	81.06	0.71	12.62	0.05	11.12	59.41	42.7	3.78	15.04	2.47	0.73	0.54	3.3	3.74	1.01	2.89	0.46	3.15	0.43	1.1	0.02	25.25	188.38	0.46
797	1237	1237-6	11449.5	1.63	157.28	2.71	226.02	44.43	39	1.04	NA	4.22	61.84	26.45	74.71	1.29	15.92	0.16	4.28	45.7	40.12	3.3	13.59	2.77	0.73	0.47	2.88	3.23	0.81	2.34	0.41	3.44	0.32	0.99	0.03	29.42	272.59	0.54
798	1237	1237-7	10363.2	0.03	0.02	0.05	94.96	15.32	4.18	0.01	NA	0	6.46	0.02	0.01	0	0.01	0	0.03	0.01	0.02	0	0	0	0	0	0	0	0	0	0	0	0	0	0	0.01	0.73	0
799	1237	1237-8	9841.43	1.35	84.88	2.16	201.35	31.87	24.62	0.95	NA	1.25	34.66	27.87	49.02	0.48	6.25	0.02	4.54	39.68	29.87	2.63	11.41	2.34	0.7	0.38	2.6	2.89	0.78	2.27	0.34	2.88	0.32	0.6	0.01	16.55	119.39	0.45
800	1237	1237-9	11728.2	5.94	280.82	4.02	415.2	47.01	15.01	2.53	NA	3.91	74.55	115.41	215.06	2.6	27.18	0.06	8.3	166.02	128.8	10.57	42.99	7.03	2.03	1.59	10.22	11.58	2.94	9.01	1.33	9.48	1.28	2.47	0.05	85.82	266.94	1.18
801	1237	1237-10	10348.9	6.4	445.76	5.56	439.62	93.11	31.28	2.98	NA	5.06	71.85	116.06	223.68	2.76	39.17	0.1	9.35	174.79	140.58	11.68	48.29	7.99	2.36	1.8	11.31	13.25	3.3	10.09	1.47	10.55	1.39	2.84	0.08	89.71	322.55	1.43
802	1237	1237-11	9591.29	3.61	207.04	3	174.93	44.51	22.43	1.08	NA	1.49	39.43	73.08	128.44	1.03	8.16	0.04	4.33	88.03	82.57	7.12	29.53	5.54	1.56	1.3	7.6	9.72	2.48	7.74	1.16	8.37	1.11	1.78	0.03	31.35	109.7	1.27
805	1237	1237-14	12478.7	6.04	291.82	3.91	405.15	22.11	6.79	1.84	NA	2.65	75.39	108.91	180.92	2.22	26.32	0.05	5.13	183.9	156.86	12.79	49.52	7.93	2.33	1.74	11	12.72	3.1	9.7	1.42	10.59	1.36	1.76	0.05	100.41	175.73	10.25
806	1237	1237-15	12321.4	0.07	0.06	0.13	179.57	0.6	0.13	0.01	NA	0	3.6	0.05	0.01	0.05	0.04	0	0.02	0.04	0.03	0	0.01	0	0	0	0	0	0	0	0	0	0	0	0	0	0.24	0
807	1237	1237-17	12921.8	4.11	147.72	2.49	382.09	23.3	7.68	1.99	NA	2.35	84.76	82.85	150.61	1.43	20.53	0.07	6.03	135.56	97.75	7.19	28	4.21	1.28	0.97	6.78	7.06	1.86	5.85	0.82	5.8	0.83	0.9	0.03	48.96	100.89	0.64
808	1237	1237-24	14372.6	5.88	160.62	2.49	305.38	4.88	2.15	1.36	NA	4.1	87.03	101.05	209.87	2.12	51.6	0.17	5.55	170.25	166.37	13.46	51.28	8.07	2.41	1.79	10.42	11.9	3.14	8.93	1.41	9.57	1.35	1.21	0.04	98.17	120.84	0.88
809	1237	1237-25	13393.5	1.09	14.6	0.4	171.58	17.3	5.1	0.62	NA	0.55	87.28	16.5	64.43	0.38	15.47	0.02	3.22	26.5	25.28	2.08	8.1	1.36	0.4	0.32	1.79	2.14	0.56	1.58	0.24	1.63	0.24	0.41	0	24.4	100.43	0.13
810	1237	1237-26	14780	2.89	58.76	1.01	165.25	8.84	2.32	1.29	NA	3.35	123.8	39.53	78.38	0.91	11.87	0.05	6.02	62.91	58.73	5.09	19.93	3.45	1	0.81	4.43	5.65	1.48	4.17	0.67	4.45	0.62	0.48	0.01	38.49	65.46	0.21
811	1237	1237-27	13900.9	2.86	66.41	1.12	263.72	11.83	3.58	1.34	NA	2.52	207.52	43.49	157.62	1.14	14.97	0.06	6.9	84.56	76.76	6.09	23.37	3.72	1.12	0.86	5.06	5.73	1.51	4.3	0.66	4.43	0.64	0.97	0.01	59.11	129.55	0.37
813	1237	1237-29	13836.6	3.52	321.17	1.97	272.31	6.73	6.46	1.1	NA	0.74	89.5	61	97.95	1.49	10.38	0.02	5.06	119.29	86.54	7.23	27.73	4.56	1.31	1.08	6.3	7.3	1.94	5.47	0.86	5.65	0.82	0.76	0.05	63.38	63.14	1.3
817	1237	1237-36	11092.2	1.9	263.9	2.77	327.8	36.48	7.9	1.61	NA	3.56	92.88	36.28	86.71	1.07	15.74	0.11	7.2	52.98	40.96	3.27	12.82	2.09	0.62	0.48	3.07	3.25	0.9	2.59	0.39	2.5	0.4	0.76	0.04	39.63	150	0.7
818	1237	1237-37	9341.14	2.4	371.78	3.45	331.4	23.67	7.79	1.79	NA	4.5	79.94	46.94	68.13	1.52	14.83	0.16	6.9	70.83	52.97	4.15	16.25	2.57	0.77	0.61	3.9	4.1	1.14	3.23	0.5	3.29	0.5	0.6	0.12	63.08	123.71	0.99
819	1237	1237-38	10792	2.29	205.88	2.77	287.45	8.62	2.3	1.16	NA	2.84	60.87	47.95	57.08	0.98	9.44	0.08	4.66	67.28	50.47	3.64	14.7	2.27	0.68	0.55	3.67	3.72	1.05	3.07	0.46	2.95	0.5	0.43	0.03	47.49	83.92	0.65
820	1237	1237-39	13407.8	3.43	306.98	4.48	443.03	27.66	7.81	1.97	NA	3.33	98.07	70.64	95.81	1.45	13.45	0.08	7.34	101.39	73.6	5.51	21.69	3.3	1	0.8	5.3	5.37	1.57	4.46	0.68	4.38	0.71	0.8	0.05	71.61	131.2	1.01
821	1237	1237-40	13093.3	3.09	172.08	4.88	397.27	34.46	12.48	1.91	NA	2.7	101.19	60.45	176.01	1.12	10.63	0.1	8.15	90.58	54.87	3.66	14.9	2.23	0.71	0.57	4	3.77	1.13	3.22	0.47	3.03	0.52	1.41	0.03	67.51	70.26	0.74
822	1237	1237-41	11656.8	0.76	48.23	2.06	229.99	14.72	3.72	2.83	NA	1.86	222.46	12.52	41.51	0.29	10.95	0.06	16.58	19.45	13.81	0.91	3.68	0.57	0.17	0.14	0.94	0.94	0.27	0.78	0.11	0.72	0.13	0.29	0.01	19.33	131.4	0.27
823	1237	1237-42	10341.7	1.33	92.4	2.57	212.9	22.36	4.93	1.48	NA	2.68	84.07	26.15	80.98	0.52	17.53	0.1	7.32	37.61	25.64	1.8	7.18	1.17	0.36	0.29	1.93	1.91	0.55	1.64	0.24	1.5	0.26	0.55	0.02	42.78	155.04	0.44
824	1237	1237-43	11592.5	3.06	196.61	5.35	398.01	28.86	7.89	2.26	NA	3.97	87.17	55.9	171.05	1.16	45.88	0.13	8.43	81.74	46.17	2.98	11.81	1.74	0.54	0.45	3.35	2.96	0.92	2.77	0.4	2.72	0.47	1.01	0.04	53.3	156.92	0.95
825	1237	1237-44	11906.9	1.16	75.37	2.05	196.56	23.14	6.22	2.33	NA	3.77	213.03	21.42	68.31	0.46	12.52	0.15	11.91	34.04	20.13	1.26	5	0.74	0.23	0.19	1.33	1.24	0.38	1.12	0.16	1.03	0.19	0.4	0.02	23.37	118.18	0.8
826	1237	1237-45	11849.7	3.04	280.04	3.75	393.57	22.93	6.12	2.02	NA	2.75	100.46	58.34	171.93	1.14	21.79	0.1	8.13	88.26	53.55	3.65	14.62	2.22	0.67	0.57	3.97	3.91	1.16	3.4	0.51	3.24	0.55	0.99	0.05	54.72	100.4	0.68
827	1237	1237-46	12328.6	0.54	73.05	1.44	409.93	97.61	15.46	226.87	NA	1.51	352.43	11.63	40.24	0.27	26.7	0.07	1546.54	18.35	13.83	1.08	4.23	0.66	0.22	0.16	1.02	1.04	0.3	0.84	0.13	0.78	0.13	0.46	0.01	15.02	103.55	0.37
830	1237	1237-54	2422.84	0.05	2.38	0.05	2.11	1.24	0.37	24.49	NA	0.07	14.53	0.54	1.13	0.01	0.17	0	142.36	5.8	4.3	0.26	0.81	0.08	0.02	0.01	0.07	0.07	0.02	0.05	0.01	0.06	0.01	0.02	0	0.61	2.45	0.01
842	1262	1262-11	22441.6	0.03	4.4	0.39	126.03	0.41	0.11	0.09	NA	0.37	18.84	0.04	0.08	0	0.02	0.01	0.51	2.3	0.52	0.02	0.07	0.01	0	0	0.01	0.01	0	0	0	0	0	0	0	0	0.44	0.01
843	1262	1262-12	24957.4	0.05	551.2	3.47	102.19	1.28	0.2	1.39	NA	5.11	49.49	0.25	0.75	1.27	0.02	0.13	7.51	1.85	0.64	0.04	0.12	0.01	0.01	0	0.03	0.02	0	0.01	0	0.01	0	0.03	0.05	0.19	3.45	0.05
852	1262	1262-21	26172.3	2.99	150	1.31	196.78	2.66	0.28	3.5	NA	8.96	317.97	398.49	114.08	0.79	1.16	0.21	23.62	319.22	429.53	38.67	170.73	26.01	7.47	4.55	36.94	27.26	6.67	17.44	2	11.77	1.9	0.7	0.07	0.79	285.95	0.65
877	1262	1262-44	18882.4	0.19	2.4	0.15	78.94	1.47	0.09	0.05	NA	0.14	61.11	1.52	23.08	0.04	0.04	0	0.31	2.74	1.78	0.16	0.67	0.16	0.05	0.04	0.2	0.25	0.05	0.14	0.02	0.13	0.02	0.15	0	0.47	0.23	0.03
887	1303	1303-4	28838.2	2.74	22.36	0.5	623.45	0.25	0.04	2.1	NA	0.01	88.53	26.78	126.54	2.9	3.1	0	13.97	19.26	29.09	3.42	14.41	2.17	0.58	0.51	2.7	3.79	1.09	3.03	0.46	2.94	0.41	0.21	0	NA	159.94	0.11
889	1303	1303-7	36649.9	3.07	41.85	0.6	686.06	0.31	0.07	2.17	NA	0.01	94.31	28.89	187.58	4.44	2.9	0	15.33	22.37	33.21	3.91	16.13	2.41	0.63	0.55	2.89	4.09	1.16	3.18	0.5	3.16	0.43	0.28	0	NA	230.32	0.14
890	1303	1303-8	37528.9	4.8	58.75	0.77	922.03	0.39	0.08	3.99	NA	0.02	153.75	48.7	269.14	6.34	4.83	0	28.54	36.46	52.6	6.05	25.88	3.9	1.04	0.92	4.86	6.79	1.92	5.35	0.83	5.3	0.72	0.42	0	NA	210.81	3.17
891	1303	1303-9	34048.4	1.63	21.78	0.49	578.95	0.4	0.05	1.1	NA	0.01	64.69	14.09	108.29	2.55	1.56	0	7.6	11.69	17.63	2.12	8.56	1.27	0.32	0.28	1.42	2.06	0.56	1.55	0.25	1.58	0.21	0.16	0	NA	78.67	0.11
894	1303	1303-15	35413.4	3.18	64.4	0.6	788	0.4	0.06	2.93	NA	0.01	121.33	30.81	245.17	5.44	3.23	0	21.51	26.04	34.52	3.91	16.61	2.44	0.68	0.56	3.04	4.14	1.17	3.2	0.49	3.11	0.42	0.35	0	NA	185.08	0.16
895	1303	1303-16	38508.1	7.07	98.11	0.77	1402.95	1.42	0.12	7.27	NA	0.04	305.31	86.72	387.4	8.9	9.12	0	55.45	63.45	83.97	10	43.2	6.4	1.74	1.52	8.14	11.15	3.28	8.96	1.35	8.41	1.2	0.66	0	NA	309.04	0.79
896	1303	1303-17	30689.3	2.87	48.02	0.54	682.61	2.98	0.68	2.54	NA	0.01	101.3	28.74	179.6	3.96	3.39	0	19.17	23.54	31.62	3.78	16.11	2.36	0.64	0.56	2.92	3.97	1.17	3.19	0.49	3.06	0.42	0.29	0	NA	163.29	0.17
897	1303	1303-19	35849.4	1.81	41.22	0.44	597.26	0.8	0.08	1.45	NA	0.01	73.51	16.8	142.79	3.08	2.08	0	10.39	15.55	20.76	2.41	9.8	1.42	0.38	0.32	1.64	2.28	0.65	1.77	0.27	1.71	0.23	0.21	0	NA	100.46	0.12
898	1303	1303-20	37500.4	11.87	21.87	1.09	2608.92	1.69	0.25	25.93	NA	0.08	687.4	243.68	388.37	5.46	30.65	0.01	194.34	151.76	172.57	17.94	77.84	11.59	3.27	3.02	18.35	21.31	6.63	18.48	2.66	15.81	2.58	0.92	0	NA	959.76	0.98
899	1303	1303-21	39079.8	14.65	74.21	1.35	2301.54	1.34	0.24	28.43	NA	0.09	755.4	250.54	318.19	7.3	33.95	0	215.88	215.83	262.1	27.33	122.04	16.88	4.8	3.97	23.32	27.51	8.14	22.14	3.21	19.59	2.94	0.83	0	NA	1747.96	17.21
900	1303	1303-22	14386.9	0.25	7.69	0.16	189.23	0.1	0.02	0.23	NA	0	17.53	1.91	14.55	0.38	0.18	0	1.81	2.71	4.1	0.43	1.58	0.2	0.06	0.04	0.21	0.27	0.07	0.19	0.03	0.18	0.03	0.03	0	NA	5.48	0
901	1303	1303-23	22563.1	0.62	33.57	0.31	348.86	0.2	0.03	0.68	NA	0	58.16	4.16	51.76	1.33	0.54	0	5.18	6.41	9.05	0.96	3.45	0.45	0.12	0.08	0.43	0.57	0.16	0.42	0.07	0.41	0.05	0.09	0	NA	21.75	0.03
902	1303	1303-24	35499.2	1.63	69.13	0.64	954.53	0.93	0.07	1.87	NA	0.01	130.01	12.71	171.14	2.61	2.53	0	13.43	23.74	35.03	3.89	13.71	1.69	0.44	0.28	1.45	1.9	0.51	1.36	0.21	1.32	0.17	0.29	0	NA	78.56	0.17
903	1303	1303-25	21862.7	1.37	69.08	0.42	445.61	0.65	0.03	0.85	NA	0.01	71.09	11.97	196.22	3.31	0.97	0	6.25	12.51	20.05	2.46	9.64	1.37	0.36	0.26	1.36	1.79	0.48	1.27	0.2	1.21	0.16	0.27	0	NA	34.28	0.12
904	1303	1303-31	32218.7	1.31	75.25	0.49	660.35	0.86	0.05	1.14	NA	0.01	88.22	8.75	196.15	3.46	1.29	0	8.28	13.05	19.9	2.3	8.18	1.07	0.28	0.18	0.96	1.26	0.34	0.88	0.14	0.86	0.11	0.28	0	NA	124.86	0.13
905	1303	1303-32	79260.3	2.8	73.69	1.68	1364.29	1.57	0.11	2.42	NA	0.01	182.9	22.86	188.48	3.14	3.2	0	18.15	28.44	44.82	5.2	20.09	2.85	0.73	0.53	2.7	3.7	1.01	2.65	0.42	2.6	0.34	0.31	0	NA	181.61	0.24
906	1303	1303-33	35999.5	0.67	30.96	0.42	728.59	0.34	0.04	0.57	NA	0	47.05	4.06	84.13	1.66	0.59	0	4.11	6.05	9.42	1.02	3.61	0.48	0.13	0.08	0.44	0.59	0.16	0.42	0.07	0.42	0.05	0.12	0	NA	25.06	0.07
907	1303	1303-37	32990.6	4.81	112.44	0.77	1140.07	1.17	0.08	4.78	NA	0.03	244.25	52.37	310.64	7.55	5.58	0	35.85	48.05	74.27	8.75	35.41	5.07	1.3	1.04	5.43	7.27	1.99	5.37	0.83	5.05	0.68	0.46	0	NA	234.96	0.26

## Sheet: S3 Secondary minerals
Table S3 Secondary minerals identified by PXRD
Sample Number	Mine Location	State	Country	IAEA classification	Secondary mineral	Formula	Secondary mineral	Formula	Secondary mineral	Formula	Secondary mineral	Formula	Secondary mineral	Formula	Secondary mineral	Formula
333	Yancey County	North Carolina	USA	Intrusive non-granite related	Oxidized uraninite	U4O9	Uranophane	Ca(UO2)2SiO3(OH)2•5(H2O)
334	Mitchell County	North Carolina	USA	Intrusive non-granite related	becquerelite	Ca(UO2)6O4(OH)6 · 8H2O	calcurmolite	(Ca,Na)2(UO2)3Mo2(O,OH)11 · nH2O
338	Mitchell County	North Carolina	USA	Intrusive non-granite related
340	Bancroft	Ontario	Canada	Intrusive non-granite related
344	Ruggles Mine	New Hamsphire	USA	Intrusive non-granite related	becquerelite	Ca(UO2)6O4(OH)6 · 8H2O	α-uranophane	Ca(UO2)2(SiO3OH)2 · 5H2O	schoepite	(UO2)8O2(OH)12 · 12H2O	ulrichite	CaCu(UO2)(PO4)2•4(H2O)	novacekite	Mg(UO2)2(AsO4)2 · 12H2O	uranocircite	Ba(UO2)2(PO4)2 · 10H2O
348	Foster Lake	Saskatchewan	Canada	Intrusive non-granite related	uranopilite	(UO2)6(SO4)O2(OH)6 · 14H2O	billietite	Ba(UO2)6O4(OH)6 · 4-8H2O
353	Happy Jack, San Juan County	Utah	USA	Sandstone tabular
423	Great Bear Lake	Northern Territories	Canada	Metamorphite	Sklodowskite	(H3O)2Mg(UO2)2(SiO4)2•4(H2O)	Curite	Pb3+x(H2O)2[(UO2)4+x(OH)3-x]2, x~0.5	rutherfordine	UO2(CO3)
437	Shinkolobwe	Katanga	D.R. Congo	Metamorphite
511	Rabbit Lake	Saskatchewan	Canada	Proterozoic unconformity	becquerelite	Ca(UO2)6O4(OH)6 · 8H2O	uranopilite	(UO2)6(SO4)O2(OH)6 · 14H2O	metauranospinite	Ca(UO2)2(AsO4)2 · 8H2O	kasolite	Pb(UO2)[SiO4] · H2O	umohoite	(UO2)MoO4 · 2H2O
516	Australia	Northern Territories	Australia	Metamorphite	Curite	Pb3+x(H2O)2[(UO2)4+x(OH)3-x]2, x~0.5	rutherfordine	UO2(CO3)	znucalite	CaZn11(UO2)(CO3)3(OH)20•4(H2O)	uranyl vanadates
522	Billiken Lode, Jefferson County	Colorado	USA	Metamorphite	uranopilite	(UO2)6(SO4)O2(OH)6 · 14H2O	billietite	Ba(UO2)6O4(OH)6 · 4-8H2O	phosphuranylite	(H3O)3KCa(UO2)7(PO4)4O4 · 8H2O
531	Marshall Pass, Gunnison County	Colorado	USA	Metamorphite hydrothermal vein
564	Jachymov	Karlovy Vary	Czech Republic	Intrusive granite related	metauranocircite	Ba(UO2)2(PO4)2•6-8(H2O)	uranophane	Ca(UO2)2SiO3(OH)2•5(H2O)	dewindtite	Pb3[H(UO2)3O2(PO4)2]2•12(H2O)
604	Australia	Northern Territories	Australia	Proterozoic unconformity	rutherfordine	UO2(CO3)	rutherfordine	UO2(CO3)
623	Marshall Pass	Colorado	USA	Metamorphite hydrothermal vein	becquerelite	Ca(UO2)6O4(OH)6 · 8H2O	natrouranospinite	(Na2,Ca)(UO2)2(AsO4)2 · 5H2O
626	Echo Mine, Great Bear Lake	Northern Territories	Canada	Metamorphite	uranopilite	(UO2)6(SO4)O2(OH)6 · 14H2O
662	Shinkolobwe	Katanga	D.R. Congo	Metamorphite	boltwoodite	HK(UO2)(SiO4)•1.5(H2O)
809	Marshall Pass	Colorado	USA	Metamorphite hydrothermal vein	Compreignacite	K2(UO2)6O4(OH)6 · 7H2O	phosphuranylite	(H3O)3KCa(UO2)7(PO4)4O4 · 8H2O	uranospinite	Ca(UO2)2(AsO4)2•10(H2O)	uranyl vanadates
1232	Big Indian Wash	Utah	USA	Sandstone	vorlanite	Ca(U6+)O4	clarkeite	(Na,Ca,Pb)(UO2)O(OH) · 0-1H2O
1237	Adair Mine, Cane Spring Canyon	Utah	USA	Sandstone
1262	Adair Mine, Cane Spring Canyon	Utah	USA	Sandstone
1303	Big Indian Wash	Utah	USA	Sandstone

## Sheet: S4 MC-ICP-MS
Table S4 Sr, Pb, and U isotopic compositions of uraninite bulk solutions (pristine, altered, and bulk).
Sample	Sub-sample	87Sr/86Sr	87Sr/86Sr Error	87Sr/86Sro Pb age	206/204Pb	206/204Pb error	207/204Pb	207/204Pb error	208/204Pb	208/204Pb error	207/206Pb	207/206Pb error	208/206Pb	208/206Pb error	Pb-Pb age (Ma)	Pb-Pb age uncertainty (Ma)	238/235U	238/235U error	235/238U	235/238U error	234/238U	234/238U error	234/235U	234/235U error
333	Altered	0.715948	6.66e-06	0.715438	2229.54	0.219	135.162	0.0134	64.8789	0.00516	0.0606215	3.29e-07	0.0290996	1.06e-06	379	5.6	137.782	0.00362	0.00725722	1.83e-07	5.4726e-05	2.78e-08	0.00754041	3.9e-06
333	Pristine	0.719073	1.42e-05	0.718771	61570	339	3350.53	18.4	809.538	4.41	0.0544176	7.11e-07	0.0131469	1.39e-06	379	5.6	137.782	0.00489	0.00725721	2.47e-07	5.48078e-05	1.78e-08	0.00755136	2.51e-06
334	Altered	0.714403	6.89e-06	0.713819	696.658	0.0251	52.2593	0.00236	46.2361	0.00222	0.0750146	7.6e-07	0.0663703	1.19e-06	370	120	137.718	7.93e-07	0.0072612	7.93e-07	5.33539e-05	1.94e-08	0.00734734	2.75e-06
334	Pristine	n/a	n/a	n/a	19536.1	1030	1069.3	55.7	240.041	11.2	0.0546483	5.29e-06	0.0120969	1.16e-05	370	120	137.607	1.91e-06	0.00726707	1.91e-06	5.4405e-05	2.63e-08	0.00748784	3.64e-06
338	Bulk	n/a	n/a	n/a	218234	1690	11788.7	91.3	1939.46	15	0.0540184	3.61e-07	0.00888641	3.81e-07	370	120	137.742	0.00464	0.00725928	2.34e-07	5.45518e-05	2.28e-08	0.00751406	3.17e-06
340	Altered	0.779244	0.000102	0.778853	191537	4030	14220.5	299	16672.7	350	0.0742485	2.61e-06	0.0870533	3.16e-06	1049	44	137.905	0.0072	0.00725073	3.63e-07	5.5188e-05	1.53e-08	0.00761191	2.13e-06
340	Bulk	n/a	n/a	n/a	64359.8	1820	4782.56	135	5263.2	149	0.0743094	2.58e-06	0.0817761	5.92e-06	1049	44	137.761	0.00614	0.00725751	3.1e-07	5.46068e-05	2e-08	0.00752265	2.76e-06
340	Pristine	n/a	n/a	n/a	364450	7630	27064.9	566	27072.1	566	0.0742627	7.3e-07	0.0742819	9.54e-07	1049	44	137.788	0.00442	0.00725688	2.23e-07	5.46972e-05	1.58e-08	0.00753649	2.2e-06
344	Altered	n/a	n/a	n/a	9759.64	5.15	531.686	0.278	57.0058	0.0266	0.0544786	6.83e-07	0.00584118	1.02e-06	324.6	8.1	137.837	2.97e-07	0.00725494	2.97e-07	5.48149e-05	1.95e-08	0.00756155	2.72e-06
344	Pristine	0.726097	7.05e-06	0.72542	7051.49	8.25	388.417	0.452	52.4258	0.0595	0.0550828	1.01e-06	0.00743361	1.36e-06	324.6	8.1	137.695	6.56e-07	0.00726242	6.56e-07	5.43242e-05	1.44e-08	0.00747908	2.19e-06
348	Altered	0.737541	6.68e-05	0.716763	37590.2	151	2127.37	8.56	415.433	1.67	0.0565942	8.12e-07	0.0110505	1.26e-06	1043	200	139.591	0.00971	0.00716313	4.78e-07	5.34133e-05	2.41e-08	0.00745579	3.23e-06
348	Bulk	0.769996	6.41e-05	0.749625	36180.7	232	2035.17	13	429.045	2.75	0.0562498	5.42e-07	0.0118575	6.48e-07	1043	200	137.827	0.00542	0.0072548	2.74e-07	5.26294e-05	1.91e-08	0.00725369	2.62e-06
348	Pristine	0.734527	1.42e-05	0.725046	38658.8	134	2214.72	7.69	400.765	1.4	0.0572888	5.45e-07	0.010366	7.53e-07	1043	200	137.779	0.0058	0.00725738	2.93e-07	5.45497e-05	1.95e-08	0.00751586	2.72e-06
353	Altered	0.712214	1.57e-05	0.71201	310.716	0.0137	31.0817	0.00145	38.5476	0.00177	0.100033	8.5e-07	0.12406	1.53e-06	226.27	0.2	137.934	0.0102	0.00724921	5.15e-07	5.37873e-05	1.67e-08	0.00741908	2.26e-06
353	Bulk	0.718584	1.85e-05	0.71858	623.802	0.0207	46.8265	0.00171	38.6212	0.00139	0.0750658	5.83e-07	0.0619123	7.67e-07	226.27	0.2	137.898	0.0075	0.00725107	3.78e-07	5.51907e-05	2.04e-08	0.00761084	2.77e-06
353	Pristine	0.717076	4.17e-05	0.717071	592.511	0.0235	45.3629	0.00188	39.149	0.00178	0.0765611	6.26e-07	0.0660723	6.96e-07	226.27	0.2	137.892	0.00596	0.00725143	3e-07	5.52997e-05	2.63e-08	0.00762548	3.62e-06
423	Altered	0.719891	2.15e-05	0.719869	252.033	0.00776	40.7784	0.00145	35.6192	0.00142	0.1618	1.46e-06	0.141327	1.9e-06	1153.1	1.4	137.766	0.00384	0.00725806	1.94e-07	5.5319e-05	3.19e-08	0.00761957	4.49e-06
423	Pristine	0.727419	4.24e-05	0.726443	381.854	0.0574	50.9363	0.00762	35.6054	0.00529	0.133392	1.68e-06	0.0932369	1.55e-06	1153.1	1.4	137.894	0.00685	0.00725132	3.46e-07	5.4615e-05	1.17e-08	0.00753242	1.73e-06
437	Bulk	0.712085	3.45e-05	n/a	235358	20600	14208.5	1240	58.4223	3.28	0.0603691	1.67e-06	0.000250999	5.34e-06	612	120	137.819	1.56e-07	0.00725587	1.56e-07	5.50611e-05	2.73e-08	0.00758813	3.84e-06
511	Altered	0.725987	5.45e-05	0.724382	3535.2	0.588	278.682	0.0466	53.7344	0.00904	0.0788313	6.06e-07	0.0151997	4.09e-07	1195.1	0.8	137.814	0.00874	0.0072555	4.42e-07	5.44029e-05	1.2e-08	0.0074996	2.23e-06
511	Bulk	0.711858	5.86e-06	0.71157	2513.09	0.73	196.991	0.0575	53.6897	0.0152	0.0783857	6.92e-07	0.0213645	5.95e-07	1195.1	0.8	137.786	0.00548	0.00725698	2.77e-07	5.43323e-05	1.76e-08	0.00748584	2.4e-06
516	Altered	0.756729	1.04e-05	0.754876	137948	796	8636.85	49.8	45.6631	0.263	0.0626104	1.38e-06	0.000329309	4.69e-07	844	150	137.841	0.00925	0.00725879	4.68e-07	5.49443e-05	1.11e-08	0.00757371	1.51e-06
516	Pristine	0.757178	2.13e-05	0.753434	112292	4380	6913.06	269	30.8211	1.16	0.0615632	1.27e-06	0.000271979	1.41e-06	844	150	137.819	0.00667	0.00725523	3.35e-07	5.45774e-05	1.87e-08	0.00751922	2.46e-06
522	Altered	0.730357	6.6e-06	0.719528	32.2095	0.00051	16.7181	0.000327	38.8219	0.00092	0.519042	4.97e-06	1.2053	1.62e-05	537	18	137.814	1.52e-06	0.00725618	1.52e-06	5.7573e-05	3.1e-08	0.00793687	4.8e-06
522	Pristine	0.733619	3.48e-05	0.733205	36.4942	0.00564	16.9674	0.0024	38.8964	0.00567	0.464917	1.87e-05	1.06574	2.51e-05	537	18	137.888	8.17e-07	0.00725228	8.17e-07	5.28233e-05	1.88e-08	0.00728489	2.64e-06
531	Altered	0.724777	7.42e-06	0.724461	92.6196	0.00148	19.6793	0.000374	40.3172	0.000861	0.212474	1.23e-06	0.435298	3.9e-06	126.8	5.5	137.679	2.34e-07	0.00726329	2.34e-07	5.60755e-05	3.33e-08	0.00771941	4.56e-06
531	Pristine	0.724223	6.33e-06	0.723843	101.325	0.00895	20.102	0.00109	40.3317	0.00213	0.198398	8.86e-06	0.398051	3.24e-05	126.8	5.5	137.791	5.44e-07	0.00725739	5.44e-07	5.2606e-05	2.02e-08	0.00725246	2.94e-06
564	Altered	0.723752	1.89e-05	0.722794	175.183	0.0217	23.5142	0.00217	38.437	0.00284	0.134224	5.54e-06	0.219411	1.94e-05	451	21	137.813	0.00513	0.00725558	2.58e-07	5.3419e-05	1.97e-08	0.00735966	2.79e-06
564	Pristine	0.724708	1.54e-05	0.724055	171.081	0.0278	23.2846	0.0032	38.4052	0.00491	0.136112	3.85e-06	0.224502	1.31e-05	451	21	137.782	0.007	0.0072572	3.54e-07	5.26672e-05	1.44e-08	0.00725953	2e-06
604	Bulk	n/a	n/a	n/a	830.783	0.0871	83.0575	0.00859	47.1797	0.00498	0.0999748	6.97e-07	0.0567869	1.27e-06			137.886	0.00878	0.00725174	4.41e-07	5.5179e-05	1.39e-08	0.00760908	1.95e-06
623	Altered	0.72443	6.1e-06	0.724038	61.4308	0.0289	18.2152	0.00304	40.45	0.00764	0.296518	0.000101	0.658546	0.00032	35.9	5.2	137.76	2.39e-07	0.007259	2.39e-07	5.56298e-05	2.8e-08	0.00766367	3.9e-06
623	Pristine	0.723576	6.79e-06	0.723419	89.0467	0.00666	19.5059	0.00118	40.465	0.00238	0.219043	3.93e-06	0.454406	1.12e-05	35.9	5.2	137.686	1.67e-06	0.00726292	1.67e-06	5.14137e-05	3.01e-08	0.0070813	4.35e-06
626	Altered	0.733793	2.58e-05	0.718777	24862.3	66.4	2312.58	6.17	35.9406	0.0705	0.0930172	3.01e-06	0.00144577	2.07e-06	1509	19	137.502	8.25e-07	0.00727261	8.25e-07	5.50045e-05	1.54e-08	0.00756383	2.23e-06
626	Pristine	0.741011	2.38e-05	0.731891	40711.2	153	3802.75	14.3	36.021	0.127	0.0934077	1.06e-06	0.000883468	6.67e-07	1509	19	137.563	4.56e-07	0.00726939	4.56e-07	5.35063e-05	1.92e-08	0.00735819	2.74e-06
662	Altered	0.718762	9.21e-06	0.717772	109488	2230	6652.35	136	41.0666	0.841	0.0607383	8.97e-06	0.000371524	3.17e-06	612	48	137.822	0.00873	0.0072551	4.39e-07	5.43316e-05	1.46e-08	0.00748842	1.96e-06
662	Pristine	0.714227	3.78e-05	0.713322	242126	6380	14640.1	386	45.2702	1.22	0.0604644	5.52e-07	0.000184464	1.11e-06	612	48	137.707	0.00578	0.00726116	2.92e-07	5.43592e-05	2.29e-08	0.00748585	3.13e-06
809	Altered	0.72545	5.34e-06	0.724818	73.3995	0.00356	18.6313	0.000777	39.743	0.00174	0.253838	6.15e-06	0.541469	1.79e-05	82	13	137.86	0.00701	0.00725311	3.52e-07	5.41902e-05	1.5e-08	0.00747054	2.09e-06
809	Pristine	0.725436	6.4e-06	0.725102	67.5314	0.00991	18.3517	0.00149	39.7621	0.00234	0.27174	2.68e-05	0.588898	7.65e-05	82	13	137.806	0.00824	0.00725594	4.17e-07	5.34747e-05	1.09e-08	0.00736931	1.58e-06
1232	Bulk	0.709341	8.68e-06	0.70934	6803.52	27.7	356.723	1.44	39.3862	0.156	0.0524266	1.41e-06	0.00577642	1.82e-06	161	8.5	137.683	0.00573	0.0072624	2.88e-07	5.50675e-05	2.22e-08	0.00758189	3.01e-06
1237	Altered	0.709252	6.36e-06	0.709177	66.1895	0.00601	18.4352	0.00102	38.5322	0.0021	0.278547	1.12e-05	0.582232	2.68e-05	333	19	137.747	0.00821	0.00725902	4.13e-07	5.47942e-05	2.34e-08	0.00754766	3.15e-06
1237	Bulk	0.709334	6.03e-06	0.709135	1828.03	1.24	108.231	0.0731	38.2169	0.0262	0.0592047	1.7e-06	0.0209006	2.88e-06	333	19	137.737	0.0108	0.00725955	5.45e-07	5.26428e-05	1.41e-08	0.00725126	1.96e-06
1237	Pristine	0.713344	2.96e-05	0.713317	1919.21	0.926	113.32	0.0544	38.0417	0.0179	0.0590439	1.07e-06	0.0198195	2.22e-06	333	19	137.67	0.00835	0.00726311	4.22e-07	5.38252e-05	2.07e-08	0.00741017	2.75e-06
1262	Bulk	0.70949	3.87e-06	0.709132	2044.04	0.893	118.877	0.0516	38.013	0.0155	0.0581586	1.37e-06	0.0185928	1.13e-06	333	19	137.829	0.00503	0.00725474	2.54e-07	5.47082e-05	1.62e-08	0.00754013	2.22e-06
1303	Altered	0.718618	9.91e-05	0.718617	5665.8	2.82	299.829	0.148	38.523	0.0188	0.0529179	6.95e-07	0.0067985	7.73e-07	161	20	137.822	0.0213	0.0072551	1.08e-06	5.47293e-05	1.49e-08	0.00754296	2.34e-06
1303	Bulk	0.711118	1.81e-05	0.711118	6439.15	14.4	340.887	0.758	38.8733	0.0903	0.0529373	2.23e-06	0.00602767	4.26e-06	161	20	137.823	0.0096	0.00725502	4.82e-07	5.44942e-05	2.1e-08	0.00751067	2.82e-06
1303	Pristine	0.715803	7.08e-05	0.715802	3191.06	1.96	172.383	0.105	38.2585	0.022	0.0540202	9.41e-07	0.011988	1.2e-06	161	20	137.874	0.00861	0.00725236	4.33e-07	5.45396e-05	1.79e-08	0.00751991	2.4e-06
															Reproducibility - 2σ (‰)		238/235U		235/238U		234/238U		234/235U
																	0.381114		0.381472		4.31852		3.95976
																	0.299234		0.299234		8.17791		7.93369
																	0.525175

## Sheet: S5 Variable contribution
Table S5 Per cent contribution of each variable to the PCA plots in Figure 7, 9, 10, and 11.
Variable contribution for Figure 7		PCA using all variables					Variable contribution for Figure 9		PCA using EMP and REE					Variable contribution for Figure 10		PCA using EMP, REE, and MC					Variable contribution for Figure 11		PCA using EMP and MC
		Pristine		Altered					Pristine		Altered					Pristine		Altered					Pristine		Altered
#	Variable	PC 1	PC 2	PC 1	PC 2		#	Variable	PC 1	PC 2	PC 1	PC 2		#	Variable	PC 1	PC 2	PC 1	PC 2		#	Variable	PC 1	PC 2	PC 1	PC 2
1	UO2	0.477205	1.34812	0.0196291	0.760477		1	UO2	0.640732	3.58973	0.00107487	3.79695		1	UO2	0.546602	3.48071	0.00287518	0.819242		1	UO2	3.78848	0.303733	1.10717	1.87894
2	PbO	0.502095	1.09074	2.55763	0.277939		2	PbO	0.857002	4.1004	3.28605	0.174363		2	PbO	0.792789	2.04737	3.23372	0.787259		2	PbO	1.77174	1.72775	2.16097	0.905774
3	ThO2	0.308527	0.0225537	0.227337	0.48353		3	ThO2	0.482751	7.29044	0.563108	10.9586		3	ThO2	0.515956	0.633988	0.559837	0.0568651		3	ThO2	0.519987	13.9363	0.0900662	1.82965
4	SiO2	0.0128889	0.184707	2.06377	0.449516		4	SiO2	0.0372875	5.70623	2.72231	0.165524		4	SiO2	0.0285353	1.04299	2.69785	2.15444		4	SiO2	0.937986	4.97551	0.677239	2.41348
5	FeO	0.0139633	3.01166	0.051808	0.617891		5	FeO	0.000524294	10.2447	0.0307561	1.2044		5	FeO	0.00689911	6.48379	0.026777	3.23378		5	FeO	6.27498	2.76555	2.83018	0.505473
6	Al2O3	0.0221069	0.0103968	0.174771	0.413155		6	Al2O3	0.0123882	2.47405	0.274393	0.726552		6	Al2O3	0.0273972	0.277939	0.289077	0.961636		6	Al2O3	0.257068	4.07853	1.77509	2.06966
7	MnO	0.284445	0.259103	1.92517	2.3574		7	MnO	0.464209	7.70922	1.85028	13.3456		7	MnO	0.457975	0.910602	1.92148	0.991628		7	MnO	0.685665	6.34541	3.06462	12.1831
8	TiO2	0.85699	4.08915	0.105588	2.39834		8	TiO2	0.751757	1.08838	0.126789	1.14182		8	TiO2	0.68477	5.24463	0.130649	5.2693		8	TiO2	5.68212	0.607841	5.92938	0.0853326
9	As2O3	0.523468	1.67368	9.511e-06	1.08137		9	As2O3	0.797269	2.02231	0.00322014	0.183006		9	As2O3	0.662836	4.05714	0.00275635	6.70958		9	As2O3	4.52352	0.0377582	6.06004	1.75113
10	V2O3	1.14689	0.515792	0.175872	2.2747		10	V2O3	1.67182	10.7177	0.0636793	14.3951		10	V2O3	1.70717	1.75639	0.0852545	0.69039		10	V2O3	1.29171	7.36332	1.58193	9.30804
11	CaO	0.000398277	1.29822	0.000540958	3.35854		11	CaO	0.000432786	13.1317	0.0121237	12.2788		11	CaO	0.0078862	4.19963	0.00580269	4.80589		11	CaO	3.86939	6.87081	5.75177	4.69899
12	ZrO2	0.284594	4.85615	0.137121	1.69968		12	ZrO2	0.194461	0.512936	0.174326	0.91203		12	ZrO2	0.148394	5.66467	0.17721	4.11874		12	ZrO2	6.1667	2.60997	4.69669	0.0756137
13	K2O	0.244064	0.109984	0.232938	1.75653		13	K2O	0.482811	6.99055	0.201626	12.5964		13	K2O	0.424593	1.33371	0.21481	1.09106		13	K2O	1.19732	7.88969	2.10725	6.55979
14	P2O5	0.109656	2.17061	0.00115341	0.00440792		14	P2O5	0.0751821	9.14801	0.0398106	5.33511		14	P2O5	0.0485416	5.42187	0.0336322	2.27763		14	P2O5	5.3592	3.37293	1.7216	4.79844
15	SO3	0.498755	0.00579203	0.456361	0.990245		15	SO3	0.799898	6.44459	0.385976	8.72715		15	SO3	0.845154	0.783573	0.422444	0.155336		15	SO3	0.71153	10.0965	0.787753	7.83644
16	Y2O3	1.23647	0.0450129	1.82286	0.00395159		16	Y2O3	2.39546	0.7035	2.79825	1.42597		16	Y2O3	2.13148	0.802896	2.79466	0.592292		16	Y2O3	0.982363	0.0758127	1.60172	0.109205
17	Ca	0.0503487	0.941766	0.359277	0.825093		17	La	3.1274	4.80239	5.22566	2.71549		17	La	2.99955	0.619578	5.1947	0.0201771		17	87Sr/86Sr	2.36819	1.38967	0.00651084	5.52365
18	Sc	3.90028	0.564753	1.10973	0.00438836		18	Ce	6.24652	0.291767	6.4714	0.0233727		18	Ce	5.78363	0.660956	6.38511	0.220767		18	87Sr/86Sri	1.48524	0.0756216	0.0106206	3.90346
19	Ti	3.26453	0.262835	0.178316	2.78938		19	Pr	6.82507	0.0118172	6.68768	0.0231849		19	Pr	6.4066	0.219816	6.59123	0.338686		19	206Pb/204Pb	12.7786	1.0402	9.09083	8.36884
20	Cr	2.58393	1.63447	0.0251439	0.202197		20	Nd	6.83697	0.00356627	6.57747	0.433087		20	Nd	6.43726	0.123137	6.4692	0.45169		20	207Pb/204Pb	12.0704	0.886486	7.96461	7.9205
21	Mn	0.882822	0.191785	3.22554	0.655817		21	Sm	6.96837	0.11194	6.27128	1.944		21	Sm	6.67915	0.00413262	6.16245	0.190063		21	208Pb/204Pb	0.0117149	4.16449	0.000114471	5.45145
22	Co	1.1642	0.0504546	0.0242422	1.05345		22	Eu	6.6795	0.0598692	6.26801	0.0323631		22	Eu	6.42227	0.0245822	6.17159	0.0342915		22	207Pb/206Pb	8.80293	1.57169	10.4051	3.96496
23	Ni	1.05982	0.455561	0.263555	0.501856		23	Tb	6.46731	0.984817	5.7692	2.56128		23	Tb	6.20407	0.39344	5.63736	0.00140142		23	208Pb/206Pb	9.61808	1.90064	13.7531	1.81758
24	Ga	0.818462	0.621594	0.957739	0.000743741		24	Gd	6.69722	0.00434853	5.79631	0.969628		24	Gd	6.53412	0.0915676	5.71502	0.249461		24	235U/238U	0.0227416	0.00201042	0.108923	0.827037
25	Rb	1.82149	0.264198	0.220166	3.93455		25	Dy	6.75043	0.896894	6.37404	1.26986		25	Dy	6.53439	0.444885	6.24471	0.0617518		25	234U/238U	4.41091	7.95697	8.35966	2.60506
26	Sr	0.238964	0.0249868	1.89341	0.410886		26	Ho	6.8779	0.236942	6.76536	0.272277		26	Ho	6.64056	0.220008	6.64068	0.0138299		26	234U/235U	4.41144	7.95479	8.35707	2.60841
27	Y	4.24327	0.515083	4.84048	0.0947738		27	Er	6.86343	0.299963	6.77554	0.000214176		27	Er	6.60337	0.141416	6.6432	0.0121685
28	Zr	1.01727	2.86562	0.0666068	4.25188		28	m	6.70735	0.0287019	6.45857	0.311743		28	m	6.45695	0.0441972	6.33851	0.00919831			Sum	100	100	100	100
29	Nb	1.87672	4.64684	0.0518141	6.60864		29	Yb	6.75458	0.274131	6.30117	0.21733		29	Yb	6.49491	0.0607658	6.16598	0.138029
30	Cs	1.23447	4.62774	0.00627724	5.5581		30	Lu	6.53397	0.11845	5.72453	1.8588		30	Lu	6.25916	0.0223423	5.61997	0.0301871
31	Ba	1.0828	0.982761	1.06763	0.00123378									31	87Sr/86Sr	2.04232	2.50684	0.000816361	0.156108
32	La	2.31669	0.00235083	4.30615	0.0730998			Sum	100	100	100	100		32	87Sr/86Sri	0.0162059	1.49336	0.0223907	0.171438
33	Ce	4.28467	0.0573688	4.92418	0.15547									33	206Pb/204Pb	0.0125128	12.1333	0.333258	12.3589
34	Pr	4.47989	0.00377489	4.98552	0.252216									34	207Pb/204Pb	0.111883	11.5892	0.463528	11.1767
35	Nd	4.44132	0.0216326	4.80545	0.442263									35	208Pb/204Pb	0.00852151	0.0220673	0.000370663	0.0621309
36	Sm	4.54741	0.124992	4.39856	0.485154									36	207Pb/206Pb	0.382976	7.9304	0.0743487	11.5029
37	Eu	4.29312	0.167181	4.70493	0.045599									37	208Pb/206Pb	0.213334	8.73772	0.292093	13.9475
38	Tb	4.0951	0.693574	3.85009	0.30938									38	235U/238U	0.0162667	0.0207059	0.050571	0.0244197
39	Gd	4.33616	0.621729	4.15702	0.0121166									39	234U/238U	0.851343	4.17657	0.0919187	7.05839
40	Dy	4.35851	0.826358	4.47736	0.0967725									40	234U/235U	0.851664	4.17708	0.0921579	7.05484
41	Ho	4.49158	0.684793	4.91122	0.0483997
42	Er	4.54224	0.519194	5.06738	0.0505029										Sum	100	100	100	100
43	Tm	4.4974	0.410504	4.94231	0.00764274
44	Yb	4.5399	0.347947	4.8545	0.0699559
45	Lu	4.44648	0.171956	4.57617	0.0048013
46	Hf	2.5165	3.69879	0.0264907	5.78294
47	Ta	1.31886	4.04819	6.88743e-06	4.68894
48	Pb	1.10349	5.08474	2.40724	1.61901
49	Th	0.440908	0.0409295	0.150168	3.18461
50	87Sr/86Sr	1.36379	2.32823	9.06892e-05	0.0142353
51	87Sr/86Sri	0.0198696	1.26859	0.00632055	0.000301474
52	206Pb/204Pb	0.0518746	9.20764	0.347269	1.94126
53	207Pb/204Pb	0.00174519	8.85924	0.443654	1.84128
54	208Pb/204Pb	0.001201	0.0606056	0.000235869	0.348028
55	207Pb/206Pb	0.564766	6.19904	0.0196904	1.86251
56	208Pb/206Pb	0.378688	6.87478	0.166475	3.10761
57	235U/238U	0.0038304	0.0323351	0.0135297	0.108221
58	234U/238U	0.400979	4.15056	0.132815	3.96351
59	234U/235U	0.401119	4.15085	0.133084	3.96278
60	Uranophane	na	na	0.163418	0.54425
61	Skowdowskite	na	na	1.77028	2.28215
62	Curite	na	na	1.1763	2.62592
63	Rutherfordine	na	na	1.1763	2.62592
64	Znucalite	na	na	0.0319412	0.204534
65	Metauranocircite	na	na	0.0640479	0.204011
66	Dewindtite	na	na	0.0640479	0.204011
67	Boltwoodite	na	na	1.43695	1.34245
68	Phosphuranylite	na	na	0.0998197	2.62314
69	Uranospinite	na	na	0.0310751	2.15843
70	Metauranospinite	na	na	0.0318408	0.00605039
71	Compreignacite	na	na	0.0310751	2.15843
72	Oxidised Uraninite	na	na	0.114958	0.156933
73	becquerelite	na	na	0.068788	0.873554
74	calcurmolite	na	na	0.0805728	0.120763
75	uranopilite	na	na	0.0584386	0.134794
76	billietite	na	na	0.0325446	0.465058
77	Kasolite	na	na	0.0318408	0.00605039
78	Umohoite	na	na	0.0318408	0.00605039
79	Natrouranospinite	na	na	0.346434	0.765026
80	Vorlanite	na	na	0.0535535	0.0966109
81	Clarkeite	na	na	0.0535535	0.0966109
	Sum	100	100	100	100
